# Supplementary material for: Characterization of the Fe metalloproteome of a ubiquitous marine heterotroph, Pseudoalteromonas (BB2-AT2): multiple bacterioferritin copies enable significant Fe storage
Source: Royal Society of Chemistry journal article supplement (doi:10.1039/d0mt00034e), 2020-04-15
Supplement: d0mt00034e2.xlsx [file d0mt00034e2.xlsx]

## Sheet: Cellular Metal Quota
Process blank subtracted
	55Mn	56Fe	59Co	60Ni	63Cu	66Zn	95Mo
	0.000103634	0.000349032	4.85381e-06	6.59759e-05	5.21115e-05	0.00052257	6.51754e-06
Sample	55Mn (mM)	56Fe (mM)	59Co (mM)	60Ni (mM)	63Cu (mM)	66Zn (mM)	95Mo (mM)	31P (M)		Sample	55Mn (mM)	56Fe (mM)	59Co (mM)	60Ni (mM)	63Cu (mM)	66Zn (mM)	95Mo (mM)	31P (M)		M:P (mmol M : mol P)	55Mn	56Fe	59Co	60Ni	63Cu	66Zn	95Mo		Average M:P (mmol M : mol P)	55Mn	56Fe	59Co	60Ni	63Cu	66Zn	95Mo
BB2-AT2_1_1	0.00020545	0.000681163	9.06363e-06	0.000130184	9.16235e-05	0.00102982	1.2469e-05	7.90048e-05		BB2-AT2_1_1	0.000101816	0.000332131	4.20982e-06	6.42077e-05	3.9512e-05	0.000507253	5.95145e-06	7.90048e-05		BB2-AT2_1_1	1.28873	4.20393	0.0532856	0.812706	0.500121	6.42054	0.0753302		BB2-AT2_1 (n=3)	1.25451	3.94772	0.0501046	0.757926	0.497696	6.35656	0.0722007
BB2-AT2_1_2	0.000203492	0.000677731	8.91295e-06	0.000128855	9.13325e-05	0.00102622	1.2358e-05	7.90014e-05		BB2-AT2_1_2	9.98583e-05	0.000328698	4.05914e-06	6.28793e-05	3.9221e-05	0.000503647	5.8405e-06	7.90014e-05		BB2-AT2_1_2	1.26401	4.16066	0.0513806	0.795926	0.496459	6.37516	0.073929		BB2-AT2_2 (n=3)	1.33294	4.46904	0.0585439	0.889194	0.503902	6.55891	0.0829267
BB2-AT2_1_3	0.000199333	0.000623976	8.46175e-06	0.000118549	9.1355e-05	0.00101846	1.18403e-05	7.90392e-05		BB2-AT2_1_3	9.56989e-05	0.000274944	3.60794e-06	5.25726e-05	3.92435e-05	0.000495892	5.32272e-06	7.90392e-05		BB2-AT2_1_3	1.21078	3.47858	0.0456476	0.665147	0.496507	6.274	0.0673428		BB2-AT2_3 (n=2)	1.32086	4.40317	0.0689082	1.10461	0.510547	6.48422	0.0760013
BB2-AT2_2_1	0.000206349	0.000699232	9.08832e-06	0.000130815	9.15071e-05	0.00103078	1.30035e-05	7.89178e-05		BB2-AT2_2_1	0.000102715	0.0003502	4.23452e-06	6.48395e-05	3.93956e-05	0.000508211	6.48593e-06	7.89178e-05		BB2-AT2_2_1	1.30155	4.43752	0.0536573	0.821607	0.499197	6.43975	0.0821859		AVG	1.30277	4.27331	0.0591856	0.917243	0.504049	6.46657	0.0770429
BB2-AT2_2_2	0.000210149	0.000698075	9.92993e-06	0.000141965	9.2209e-05	0.00104276	1.30934e-05	7.8909e-05		BB2-AT2_2_2	0.000106515	0.000349042	5.07612e-06	7.59892e-05	4.00975e-05	0.000520186	6.57586e-06	7.8909e-05		BB2-AT2_2_2	1.34984	4.42335	0.0643288	0.962998	0.508149	6.59222	0.0833348		Stan Dev M:P (mmol M : mol P)	55Mn	56Fe	59Co	60Ni	63Cu	66Zn	95Mo
BB2-AT2_2_3	0.000209917	0.000707629	9.40075e-06	0.000135623	9.18943e-05	0.00104669	1.30848e-05	7.88777e-05		BB2-AT2_2_3	0.000106283	0.000358597	4.54695e-06	6.96473e-05	3.97828e-05	0.000524124	6.56731e-06	7.88777e-05		BB2-AT2_2_3	1.34744	4.54624	0.0576455	0.882978	0.504361	6.64477	0.0832594		BB2-AT2_1 (n=3)	0.0398353	0.406867	0.00397569	0.0807863	0.00210056	0.075017	0.00426494
BB2-AT2_3_1	0.000206522	0.000692432	9.97145e-06	0.000145697	9.19799e-05	0.00103193	1.26144e-05	7.90029e-05		BB2-AT2_3_1	0.000102888	0.0003434	5.11764e-06	7.97213e-05	3.98684e-05	0.000509357	6.09689e-06	7.90029e-05		BB2-AT2_3_1	1.30234	4.34667	0.0647779	1.00909	0.504644	6.44732	0.0771729		BB2-AT2_2 (n=3)	0.0272157	0.0672334	0.00539219	0.0709002	0.00449356	0.10649	0.000642652
BB2-AT2_3_2	0.000209596	0.000701849	1.06321e-05	0.000160921	9.29692e-05	0.00103847	1.24375e-05	7.91125e-05		BB2-AT2_3_2	0.000105962	0.000352816	5.77827e-06	9.4945e-05	4.08577e-05	0.000515902	5.91996e-06	7.91125e-05		BB2-AT2_3_2	1.33938	4.45967	0.0730386	1.20013	0.51645	6.52112	0.0748296		BB2-AT2_3 (n=2)	0.026194	0.0799062	0.00584118	0.135081	0.00834819	0.0521804	0.001657
																													STDEV AVG	0.0310817	0.184669	0.00506969	0.0955891	0.00498077	0.0778959	0.0021882
										AVG [M]	55Mn (mM)	56Fe (mM)	59Co (mM)	60Ni (mM)	63Cu (mM)	66Zn (mM)	95Mo (mM)			M:C (umol M : mol C)	55Mn	56Fe	59Co	60Ni	63Cu	66Zn	95Mo		Average M:C (umol M : mol C)	55Mn	56Fe	59Co	60Ni	63Cu	66Zn	95Mo
All culture samples grown in replete marine broth (see Experimental Procedure for details)										BB2-AT2_1 (n=3)	0.000297373	0.000935773	1.18769e-05	0.00017966	0.000117976	0.00150679	1.71147e-05			BB2-AT2_1_1	25.2692	82.43	1.04482	15.9354	9.80629	125.893	1.47706		BB2-AT2_1 (n=3)	24.5982	77.4063	0.982443	14.8613	9.75874	124.638	1.4157
BB2-AT2_1_1	BB2-AT2 biological replicate 1, technical replicate 1									BB2-AT2_2 (n=3)	0.000315513	0.00105784	1.38576e-05	0.000210476	0.000119276	0.00155252	1.96291e-05			BB2-AT2_1_2	24.7844	81.5816	1.00746	15.6064	9.73449	125.003	1.44959		BB2-AT2_2 (n=3)	26.1361	87.6282	1.14792	17.4352	9.88044	128.606	1.62601
BB2-AT2_1_2	BB2-AT2 biological replicate 1, technical replicate 2									BB2-AT2_3 (n=2)	0.00020885	0.000696216	1.08959e-05	0.000174666	8.07261e-05	0.00102526	1.20168e-05			BB2-AT2_1_3	23.7408	68.2074	0.89505	13.0421	9.73543	123.02	1.32045		BB2-AT2_3 (n=2)	25.8992	86.3367	1.35114	21.659	10.0107	127.142	1.49022
BB2-AT2_1_3	BB2-AT2 biological replicate 1, technical replicate 3																			BB2-AT2_2_1	25.5206	87.0102	1.0521	16.1099	9.78818	126.27	1.61149		AVG	25.5445	83.7904	1.1605	17.9852	9.8833	126.795	1.51064
BB2-AT2_2_1	BB2-AT2 biological replicate 2, technical replicate 1																			BB2-AT2_2_2	26.4675	86.7324	1.26135	18.8823	9.96371	129.259	1.63402		Stan Dev M:C (umol M : mol C)	55Mn	56Fe	59Co	60Ni	63Cu	66Zn	95Mo
BB2-AT2_2_2	BB2-AT2 biological replicate 2, technical replicate 2									Total [M] (mM)										BB2-AT2_2_3	26.4204	89.1419	1.1303	17.3133	9.88943	130.29	1.63254		BB2-AT2_1 (n=3)	0.781085	7.97778	0.0779547	1.58405	0.0411874	1.47092	0.0836263
BB2-AT2_2_3	BB2-AT2 biological replicate 2, technical replicate 3									BB2-AT2_1 (n=3)	0.00306657									BB2-AT2_3_1	25.536	85.2288	1.27015	19.7861	9.89499	126.418	1.51319		BB2-AT2_2 (n=3)	0.53364	1.3183	0.105729	1.3902	0.0881091	2.08805	0.012601
BB2-AT2_3_1	BB2-AT2 biological replicate 3, technical replicate 1									BB2-AT2_2 (n=3)	0.00328911									BB2-AT2_3_2	26.2623	87.4446	1.43213	23.5319	10.1265	127.865	1.46725		BB2-AT2_3 (n=2)	0.513608	1.56679	0.114533	2.64864	0.16369	1.02315	0.0324901
BB2-AT2_3_2	BB2-AT2 biological replicate 3, technical replicate 2									BB2-AT2_3 (n=2)	0.00220863																		STDEV AVG	0.609444	3.62096	0.0994056	1.8743	0.0976621	1.52737	0.0429058
										% Contribution M	55Mn (mM)	56Fe (mM)	59Co (mM)	60Ni (mM)	63Cu (mM)	66Zn (mM)	95Mo (mM)
										BB2-AT2_1 (n=3)	9.69728	30.5153	0.387303	5.85866	3.84719	49.1361	0.558105
										BB2-AT2_2 (n=3)	9.59265	32.1618	0.421317	6.39917	3.62639	47.2018	0.596791
										BB2-AT2_3 (n=2)	9.45609	31.5225	0.493333	7.90835	3.65503	46.4206	0.544086
										AVG	9.58201	31.3999	0.433984	6.72206	3.70953	47.5862	0.566327
										STDEV	0.120947	0.830068	0.0541382	1.06231	0.120066	1.39797	0.0272975

## Sheet: Soluble Metal Quota
Raw data
		AEF	200	200	200	200	200	200	200	200	200	200	200	200	200	200	200	200	250	250	250	250	250	250	250	250	250	250	250	250	250	250	250	300	300	300	300	300	300	300	300	300	300	300	300	300	300	300	300
		MWF	1	2	3	4	5	6	7	8	9	10	11	12	13	14	15	16	1	2	3	4	5	6	7	8	9	10	11	12	13	14	15	1	2	3	4	5	6	7	8	9	10	11	12	13	14	15	16
	55Mn (uM)		0.00853665	0.00829546	0.0107113	0.037213	0.0143576	0.0102767	0.0175327	0.0157551	0.0108742	0.00818985	0.00721808	0.00789802	0.00730784	0.00728047	0.0071591	0.00716196	0.00746877	0.00800398	0.00756828	0.0183758	0.00946723	0.00952019	0.0133135	0.00935747	0.00756519	0.00622818	0.00690661	0.00696641	0.00693218	0.00702391	0.00691018	0.0057756	0.00683839	0.00485069	0.00792682	0.00647506	0.00491639	0.00455355	0.0035722	0.00233121	0.00423995	0.00448508	0.00507335	0.00518254	0.00470418	0.00522355	0.00509133
	56Fe (uM)		0.0220302	0.0244322	0.0364343	0.12772	0.0637825	0.0289174	0.0227254	0.0141977	0.0138584	0.0377643	0.0128052	0.0155117	0.0342594	0.0403156	0.148048	0.100032	0.0213541	0.0241189	0.0296764	0.123637	0.0574526	0.0248279	0.0244812	0.0132857	0.0194245	0.0490277	0.0140706	0.0195435	0.0227989	0.0270768	0.0259584	0.017776	0.0149163	0.0156412	0.049517	0.0908055	0.0201075	0.0270867	0.014079	0.0624353	0.0278781	0.0128693	0.0408515	0.0274796	0.0225378	0.0268078	0.0243599
	59Co (uM)		0.000342265	0.000333539	0.000392211	0.00108225	0.000488629	0.00038452	0.000482713	0.000385273	0.000306804	0.000219567	0.000223093	0.00028434	0.000280846	0.000456862	0.00117421	0.0018052	0.000429186	0.000472495	0.000420255	0.000936862	0.000503328	0.000562412	0.000673924	0.000457103	0.000387534	0.000320241	0.000350628	0.000386005	0.000436936	0.000724708	0.00184005	0.000430175	0.000386253	0.000344566	0.000565661	0.000429227	0.000369975	0.000365841	0.000279073	0.000393713	0.000438914	0.000555902	0.000290692	0.000496712	0.000986383	0.00183661	0.00124562
	64Zn (uM)		0.00465844	0.0101314	0.00999026	0.0314386	0.0150886	0.00972625	0.022926	0.0099654	0.00817274	0.0141341	0.00847476	0.0199535	0.00729751	0.00766376	0.0287776	0.0356562	0.00640097	0.00523666	0.0103891	0.0278221	0.0230916	0.00797457	0.00717678	0.0092357	0.0187437	0.00603781	0.00853517	0.0165581	0.0177953	0.0168907	0.0210478	0.0130634	0.0134143	0.0029222	0.0122494	0.0165846	0.00491898	0.0104665	0.0102507	0.0262841	0.0167946	0.0178655	0.0217112	0.0311885	0.0217592	0.016225	0.0152617
	60Ni (uM)		0.0576557	0.0649402	0.0712737	0.187387	0.0912837	0.0628943	0.0729447	0.0684034	0.0508716	0.0424166	0.0399081	0.0432464	0.0483198	0.0972049	0.265184	0.590853	0.0681583	0.0760023	0.0676791	0.152071	0.0865808	0.078095	0.0787941	0.0701249	0.0548782	0.0520787	0.0442922	0.0521495	0.0639476	0.110594	0.281576	0.0581939	0.0587032	0.0556973	0.0846673	0.073263	0.0622005	0.0581893	0.055773	0.0485941	0.0498144	0.0485503	0.0525609	0.0699848	0.129773	0.275123	0.350809
	63Cu (uM)		0.000791766	0.0010554	0.00167902	0.00424312	0.00184885	0.000715846	0.00144913	0.000905435	0.00121784	0.000769122	0.000898103	0.00120194	0.00206317	0.00725912	0.0198655	0.0112883	0.00199906	0.00106771	0.0097076	0.00291595	0.00181239	0.000572153	0.000852	0.000727716	0.000897318	0.00155471	0.000644084	0.0124935	0.00590749	0.00536562	0.0162462	nd	nd	nd	nd	9.03284e-06	nd	nd	nd	nd	nd	0.000128373	0.000785473	0.00222916	0.00143688	0.00133451	nd
	95Mo (uM)		0.000251971	0.00238376	0.000259677	0.000613771	0.000331329	0.00045708	0.000477902	0.000512187	0.00024518	0.000346031	0.000521037	0.000550882	0.000184571	0.00055832	0.00037372	0.00118483	0.000796957	0.00196164	0.00122973	0.000594974	4.91803e-05	0.0019325	0.000278787	0.000278853	0.000397156	0.0004745	0.000344277	0.000669287	0.000795315	9.42901e-05	0.00143207	5.34745e-05	0.000294851	5.79643e-06	0.00326923	0.000150337	0.000462717	0.000411518	0.000321147	0.000759992	0.000398028	0.000497891	0.00595023	0.00345385	0.00230554	0.00184446	0.00134866
	31P (M)		7.80407e-05	7.87958e-05	7.80879e-05	8.06421e-05	7.89347e-05	8.106e-05	8.13414e-05	8.1435e-05	8.13816e-05	8.13383e-05	8.14512e-05	8.12375e-05	7.81571e-05	7.93522e-05	8.02827e-05	8.02186e-05	8.01983e-05	8.1105e-05	8.09066e-05	8.12207e-05	8.1424e-05	8.13955e-05	8.14106e-05	8.13892e-05	8.05379e-05	8.04376e-05	7.54755e-05	8.1032e-05	8.13788e-05	8.13995e-05	8.11279e-05	8.12663e-05	7.2448e-05	7.3597e-05	6.05509e-05	6.64157e-05	7.3956e-05	7.07723e-05	6.52986e-05	7.68419e-05	7.5129e-05	7.0884e-05	7.2448e-05	7.56317e-05	8.11222e-05	8.11501e-05	8.14323e-05
*All metal data used for metalloproteomic assignments with metalloproteome_proteins tab
**Negative values were converted to nd; nd was replaced with 0 for computational purposes
Subtraction of the 800 mM, MWF 1 metal values
		AEF	200	200	200	200	200	200	200	200	200	200	200	200	200	200	200	200	250	250	250	250	250	250	250	250	250	250	250	250	250	250	250	300	300	300	300	300	300	300	300	300	300	300	300	300	300	300	300
		MWF	1	2	3	4	5	6	7	8	9	10	11	12	13	14	15	16	1	2	3	4	5	6	7	8	9	10	11	12	13	14	15	1	2	3	4	5	6	7	8	9	10	11	12	13	14	15	16
	55Mn (uM)		0.00245279	0.0022116	0.00462744	0.0311292	0.00827378	0.00419281	0.0114489	0.00967125	0.00479033	0.00210599	0.00113422	0.00181416	0.00122398	0.00119661	0.00107524	0.0010781	0.00138491	0.00192012	0.00148442	0.0122919	0.00338337	0.00343633	0.00722968	0.00327361	0.00148133	0.000144321	0.000822751	0.000882555	0.000848324	0.000940053	0.000826318	0	0.000754535	0	0.00184296	0.000391204	0	0	0	0	0	0	0	0	0	0	0
	56Fe (uM)		0.00643398	0.00883606	0.0208381	0.112124	0.0481864	0.0133212	0.00712922	0	0	0.0221682	0	0	0.0186632	0.0247195	0.132452	0.0844353	0.00575791	0.00852271	0.0140803	0.10804	0.0418564	0.0092317	0.00888498	0	0.00382832	0.0334315	0	0.00394728	0.00720276	0.0114806	0.0103622	0.0021798	0	4.49748e-05	0.0339208	0.0752093	0.00451131	0.0114905	0	0.0468392	0.0122819	0	0.0252553	0.0118835	0.00694158	0.0112116	0.00876368
	59Co (uM)		3.73249e-05	2.85987e-05	8.72705e-05	0.000777307	0.000183688	7.95802e-05	0.000177772	8.03334e-05	1.86422e-06	0	0	0	0	0.000151922	0.000869274	0.00150026	0.000124246	0.000167555	0.000115315	0.000631922	0.000198388	0.000257472	0.000368984	0.000152163	8.25937e-05	1.53006e-05	4.56881e-05	8.10652e-05	0.000131996	0.000419768	0.00153511	0.000125235	8.13133e-05	3.96259e-05	0.000260721	0.000124287	6.50347e-05	6.09009e-05	0	8.87731e-05	0.000133974	0.000250961	0	0.000191772	0.000681443	0.00153167	0.000940678
	64Zn (uM)		0	0.00537952	0.00523833	0.0266866	0.0103367	0.00497433	0.0181741	0.00521348	0.00342082	0.00938215	0.00372284	0.0152016	0.00254558	0.00291184	0.0240257	0.0309042	0.00164905	0.000484736	0.00563721	0.0230702	0.0183397	0.00322265	0.00242486	0.00448378	0.0139918	0.00128589	0.00378325	0.0118062	0.0130434	0.0121388	0.0162959	0.00831149	0.00866237	0	0.00749747	0.0118326	0.000167059	0.00571456	0.00549879	0.0215322	0.0120427	0.0131136	0.0169593	0.0264366	0.0170073	0.011473	0.0105097
	60Ni (uM)		0.00349542	0.0107799	0.0171134	0.133226	0.0371234	0.00873395	0.0187843	0.014243	0	0	0	0	0	0.0430446	0.211024	0.536692	0.013998	0.021842	0.0135187	0.0979109	0.0324205	0.0239347	0.0246338	0.0159646	0.000717853	0	0	0	0.00978726	0.0564333	0.227416	0.00403359	0.00454284	0.00153697	0.030507	0.0191027	0.00804015	0.00402899	0.00161269	0	0	0	0	0.0158245	0.0756128	0.220962	0.296649
	63Cu (uM)		0	0.000229719	0.000853333	0.00341744	0.00102316	0	0.000623443	7.97519e-05	0.000392158	0	7.242e-05	0.000376257	0.00123749	0.00643344	0.0190398	0.0104626	0.00117338	0.000242028	0.00888191	0.00209027	0.000986709	0	2.63166e-05	0	7.16342e-05	0.000729023	0	0.0116678	0.00508181	0.00453994	0.0154205	0	0	0	0	0	0	0	0	0	0	0	0	0.00140348	0.000611201	0.000508823	0
	95Mo (uM)		0	0.00109054	0	0	0	0	0	0	0	0	0	0	0	0	0	0	0	0.000668418	0	0	0	0.000639284	0	0	0	0	0	0	0	0	0.000138847	0	0	0	0.00197601	0	0	0	0	0	0	0	0.00465701	0.00216063	0.00101232	0.000551237	5.54397e-05
	31P (M)		1.18454e-06	7.55103e-07	4.7138e-08	2.60136e-06	8.93944e-07	3.01927e-06	3.30063e-06	3.39432e-06	3.34093e-06	3.2976e-06	3.41051e-06	3.19673e-06	1.16388e-07	1.31145e-06	2.24202e-06	2.17787e-06	2.15754e-06	3.06426e-06	2.86592e-06	3.18002e-06	3.38326e-06	3.35481e-06	3.36992e-06	3.34853e-06	2.49713e-06	2.39686e-06	0	2.99126e-06	3.3381e-06	3.35876e-06	3.08719e-06	3.22554e-06	0	0	0	0	0	0	0	0	0	0	0	0	3.08148e-06	3.10941e-06	3.39154e-06
Process blank subtraction (see Experimental Methods for detail)
	55Mn	56Fe	59Co	60Ni	63Cu	66Zn	95Mo	31P
	8.572e-05	0.000438361	4.64648e-06	0.000165867	3.77572e-05	0.000529591	3.56443e-06	8.14755e-05
			200	200	200	200	200	200	200	200	200	200	200	200	200	200	200	200	250	250	250	250	250	250	250	250	250	250	250	250	250	250	250	300	300	300	300	300	300	300	300	300	300	300	300	300	300	300	300
			1	2	3	4	5	6	7	8	9	10	11	12	13	14	15	16	1	2	3	4	5	6	7	8	9	10	11	12	13	14	15	1	2	3	4	5	6	7	8	9	10	11	12	13	14	15	16
	55Mn (uM)		0.00845093	0.00820974	0.0106256	0.0371273	0.0142719	0.0101909	0.017447	0.0156694	0.0107885	0.00810413	0.00713236	0.0078123	0.00722212	0.00719475	0.00707338	0.00707624	0.00738305	0.00791826	0.00748256	0.0182901	0.00938151	0.00943447	0.0132278	0.00927175	0.00747947	0.00614246	0.00682089	0.00688069	0.00684646	0.00693819	0.00682446	0.00568988	0.00675267	0.00476497	0.0078411	0.00638934	0.00483067	0.00446783	0.00348648	0.00224549	0.00415423	0.00439936	0.00498763	0.00509682	0.00461846	0.00513783	0.00500561
	56Fe (uM)		0.0215918	0.0239939	0.0359959	0.127282	0.0633442	0.0284791	0.022287	0.0137593	0.01342	0.037326	0.0123669	0.0150734	0.033821	0.0398773	0.14761	0.0995932	0.0209157	0.0236805	0.0292381	0.123198	0.0570142	0.0243895	0.0240428	0.0128473	0.0189861	0.0485893	0.0136322	0.0191051	0.0223606	0.0266385	0.0255201	0.0173376	0.0144779	0.0152028	0.0490786	0.0903671	0.0196691	0.0266484	0.0136406	0.061997	0.0274397	0.0124309	0.0404132	0.0270413	0.0220994	0.0263695	0.0239215
	59Co (uM)		0.000337619	0.000328892	0.000387564	0.0010776	0.000483982	0.000379874	0.000478066	0.000380627	0.000302158	0.00021492	0.000218447	0.000279694	0.000276199	0.000452216	0.00116957	0.00180055	0.00042454	0.000467848	0.000415609	0.000932216	0.000498682	0.000557766	0.000669277	0.000452456	0.000382887	0.000315594	0.000345982	0.000381359	0.000432289	0.000720062	0.0018354	0.000425529	0.000381607	0.00033992	0.000561015	0.000424581	0.000365328	0.000361194	0.000274427	0.000389067	0.000434267	0.000551255	0.000286045	0.000492065	0.000981737	0.00183197	0.00124097
	64Zn (uM)		0.00412885	0.00960185	0.00946067	0.030909	0.014559	0.00919666	0.0223964	0.00943581	0.00764315	0.0136045	0.00794517	0.0194239	0.00676792	0.00713417	0.028248	0.0351266	0.00587138	0.00470707	0.00985954	0.0272925	0.022562	0.00744498	0.00664719	0.00870611	0.0182141	0.00550822	0.00800558	0.0160285	0.0172657	0.0163611	0.0205182	0.0125338	0.0128847	0.00239261	0.0117198	0.016055	0.00438939	0.00993689	0.00972112	0.0257545	0.016265	0.0173359	0.0211816	0.0306589	0.0212296	0.0156954	0.0147321
	60Ni (uM)		0.0574899	0.0647743	0.0711078	0.187221	0.0911179	0.0627284	0.0727788	0.0682375	0.0507058	0.0422507	0.0397422	0.0430805	0.0481539	0.0970391	0.265019	0.590687	0.0679925	0.0758365	0.0675132	0.151905	0.086415	0.0779292	0.0786283	0.069959	0.0547123	0.0519128	0.0441263	0.0519837	0.0637817	0.110428	0.281411	0.058028	0.0585373	0.0555314	0.0845015	0.0730971	0.0620346	0.0580234	0.0556071	0.0484282	0.0496485	0.0483845	0.0523951	0.0698189	0.129607	0.274957	0.350644
	63Cu (uM)		0.000754008	0.00101764	0.00164126	0.00420536	0.00181109	0.000678089	0.00141137	0.000867678	0.00118008	0.000731365	0.000860346	0.00116418	0.00202541	0.00722137	0.0198277	0.0112505	0.00196131	0.00102995	0.00966984	0.0028782	0.00177464	0.000534396	0.000814243	0.000689959	0.00085956	0.00151695	0.000606326	0.0124557	0.00586973	0.00532787	0.0162084	0	0	0	0	0	0	0	0	0	0	9.06157e-05	0.000747715	0.0021914	0.00139913	0.00129675	0
	95Mo (uM)		0.000248407	0.0023802	0.000256112	0.000610206	0.000327764	0.000453515	0.000474337	0.000508623	0.000241615	0.000342466	0.000517473	0.000547317	0.000181007	0.000554756	0.000370156	0.00118126	0.000793392	0.00195807	0.00122617	0.00059141	4.56158e-05	0.00192894	0.000275223	0.000275289	0.000393592	0.000470936	0.000340712	0.000665722	0.00079175	9.07256e-05	0.0014285	4.99101e-05	0.000291287	2.232e-06	0.00326566	0.000146773	0.000459153	0.000407954	0.000317583	0.000756428	0.000394464	0.000494326	0.00594667	0.00345029	0.00230198	0.00184089	0.0013451
[truncated: 120 more columns]

## Sheet: Metalloproteome_Proteins
		Anion Exchange Fraction (mM NaCl)	200	200	200	200	200	200	200	200	200	200	200	200	200	200	200	200	250	250	250	250	250	250	250	250	250	250	250	250	250	250	250	300	300	300	300	300	300	300	300	300	300	300	300	300	300	300	300
		Molecular Weight Fraction	1	2	3	4	5	6	7	8	9	10	11	12	13	14	15	16	1	2	3	4	5	6	7	8	9	10	11	12	13	14	15	1	2	3	4	5	6	7	8	9	10	11	12	13	14	15	16
#	Identified Proteins	Molecular Weight
1	BB2AT2_0147, ribosomal protein S1, 167242 - 168909	61 kDa	0	0	0	0	0	0	0	0	0	0	0	0	0	0	0	0	0	0	0	0	0	0	0	0	0	0	0	0	1	0	0	0	0	0	0	0	0	0	2	1	5	6	11	13	6	1	1
2	BB2AT2_2671, putativeglutamate dehydrogenase, NAD-specific, 32332 - 37173	?	0	2	0	0	1	0	0	0	0	2	0	0	0	0	0	0	0	0	0	0	3	0	1	3	0	0	0	0	0	0	0	0	0	0	1	6	6	5	2	0	3	0	1	0	0	0	0
3	BB2AT2_3970, chaperonin GroL, 3192 - 4841	57 kDa	0	0	0	0	0	0	0	0	0	0	0	0	0	0	0	0	0	0	0	0	0	0	0	0	0	1	0	0	1	0	1	0	0	0	0	1	1	0	0	0	0	0	0	1	0	0	1
4	BB2AT2_0935, phosphate ABC transporter, 8711 - 9676	35 kDa	1	1	5	21	49	25	22	29	23	18	18	8	3	0	0	1	2	2	4	7	13	18	20	22	21	9	6	7	1	0	0	3	5	6	10	24	35	33	36	14	6	4	1	1	0	0	0
5	BB2AT2_0474, polyribonucleotide nucleotidyltransferase, 93611 - 95737	76 kDa	0	0	0	0	0	0	0	0	0	0	0	1	0	0	0	0	0	0	0	0	0	4	0	0	0	0	0	0	0	0	0	0	0	0	0	2	0	0	0	3	3	4	1	0	0	0	0
6	BB2AT2_3714, intestinal alkaline phosphatase 1, 17012 - 18799	62 kDa	0	2	3	7	6	29	25	2	1	2	1	1	0	0	0	0	0	1	4	5	7	7	11	4	2	0	3	3	3	0	0	0	1	4	3	7	7	4	2	0	0	0	1	0	1	0	0
7	BB2AT2_2156, ribosomal protein L9, 15719 - 16171	16 kDa	0	0	0	0	0	0	0	0	0	0	0	0	0	0	0	0	0	0	0	0	0	0	0	0	0	0	0	0	0	1	0	0	0	0	0	0	0	0	0	0	1	4	92	54	51	48	36
8	BB2AT2_3265, ATP synthase F1, beta subunit, 50719 - 52104	50 kDa	0	0	1	0	0	1	0	0	0	0	0	0	0	0	0	0	0	0	1	0	0	0	0	0	0	0	1	0	13	3	2	0	0	0	0	0	0	0	0	0	0	5	4	7	4	2	0
9	BB2AT2_0131, peptidyl-prolyl cis-trans isomerase, fkbp-type, 149674 - 150294	23 kDa	0	0	0	0	0	0	0	0	0	0	0	0	0	0	0	0	0	0	0	0	0	0	0	0	0	0	0	0	0	0	0	0	0	0	0	0	0	0	0	0	0	0	0	0	0	0	0
10	BB2AT2_2308, DNA-directed RNA polymerase, beta' subunit, 79626 - 83798	154 kDa	0	0	0	2	11	7	0	0	0	0	0	0	0	0	0	0	0	0	1	3	13	5	0	0	0	0	0	0	1	0	0	0	0	1	9	13	5	0	0	0	2	1	2	1	1	0	0
11	BB2AT2_0596, chaperone protein DnaK, 30275 - 32194	69 kDa	0	0	0	0	0	0	0	0	1	0	0	1	1	0	0	0	0	0	0	0	0	0	0	0	1	0	0	0	0	0	0	0	0	0	0	0	1	0	2	1	3	3	7	16	12	2	0
12	BB2AT2_3371, translation elongation factor G, 38359 - 40443	76 kDa	0	0	0	0	0	0	0	0	0	0	0	0	0	0	0	0	1	0	1	0	0	1	0	0	0	0	0	4	2	0	0	0	0	0	2	4	1	1	0	0	8	21	7	4	4	0	0
13	BB2AT2_2312, elongation factor Tu 2, 87139 - 87612 (+1)	17 kDa	0	0	0	0	0	0	0	0	0	0	0	0	0	0	0	0	0	0	0	0	0	0	0	0	0	0	0	0	0	0	0	0	0	2	1	3	1	0	0	0	0	0	0	1	0	0	0
14	BB2AT2_3263, ATP synthase F1, alpha subunit, 48223 - 49764	55 kDa	0	0	0	0	0	0	0	0	0	0	0	0	0	1	1	0	0	0	0	0	0	0	0	0	0	0	0	0	0	0	0	0	0	0	0	0	0	0	0	0	1	8	15	17	10	5	6
15	BB2AT2_2307, DNA-directed RNA polymerase, beta subunit, 75496 - 79521	150 kDa	0	0	1	1	9	4	0	0	1	0	0	1	0	0	0	0	0	0	1	0	3	2	0	0	0	0	0	0	0	0	0	0	0	0	1	4	1	0	2	1	0	2	7	4	1	0	0
16	BB2AT2_2038, DNA-directed RNA polymerase, alpha subunit, 109525 - 110511	36 kDa	0	0	1	0	3	2	0	1	1	0	0	0	0	0	0	0	0	0	1	0	2	1	0	0	0	0	0	0	0	0	0	0	0	1	0	0	1	0	0	0	0	1	2	2	1	0	0
17	BB2AT2_2513, translation elongation factor Ts, 30376 - 31227	31 kDa	0	0	0	0	0	0	0	0	0	0	0	0	0	0	0	0	0	0	0	0	0	0	0	0	0	0	0	0	0	0	0	0	0	0	0	0	0	0	0	0	1	1	4	3	1	1	0
18	BB2AT2_0346, outer membrane protein, 162311 - 165034	101 kDa	0	1	18	36	28	11	3	1	0	1	0	0	0	0	0	0	0	0	9	28	16	6	1	0	0	0	0	0	0	0	0	0	1	7	26	11	5	0	0	0	0	0	0	0	0	0	0
19	BB2AT2_3715, alkaline phosphatase, tissue-nonspecific isozyme, 18811 - 20394	56 kDa	0	0	0	0	0	0	0	0	0	0	0	0	0	0	0	0	0	0	0	0	0	0	0	0	0	0	0	0	0	0	0	0	0	0	0	0	0	0	0	0	0	0	0	0	0	0	0
20	BB2AT2_4182, thioredoxin, 3662 - 3988	12 kDa	0	0	0	0	0	0	0	0	0	0	0	0	0	0	0	0	0	0	0	0	0	0	0	0	0	0	0	0	0	0	0	0	0	0	0	0	0	0	0	0	0	1	3	82	88	41	17
21	BB2AT2_1871, peptidyl-dipeptidase dcp, 66908 - 69043	79 kDa	0	1	12	11	12	4	1	0	13	4	0	0	0	0	0	0	0	0	9	14	11	6	1	0	13	1	0	0	0	0	0	0	0	8	11	11	5	0	5	30	15	0	0	0	0	0	0
22	BB2AT2_0610, putAtiveOuter membrane protein with a TonB box, 47921 - 51064	?	0	0	21	35	27	16	7	3	1	0	0	0	0	0	0	0	0	2	7	23	17	4	1	0	0	0	0	0	0	0	0	0	2	7	25	11	4	0	0	1	0	0	0	0	0	0	0
23	BB2AT2_2642, succinyl-CoA ligase [ADP-forming] subunit beta, 3969 - 5135	41 kDa	0	0	0	0	0	0	0	1	1	0	0	0	0	0	0	0	1	0	0	0	0	0	0	0	0	0	0	0	0	0	0	0	1	0	0	3	3	0	0	0	0	0	0	0	0	0	0
24	BB2AT2_1609, proline dehydrogenase/delta-1-pyrroline-5-carboxylate dehydrogenase, 39647 - 43450	140 kDa	0	0	0	0	0	0	1	0	0	0	0	0	0	0	0	0	0	0	0	0	0	0	0	0	0	0	0	0	0	0	0	0	0	0	0	0	0	0	0	0	0	0	0	0	0	0	0
25	BB2AT2_3432, phosphoenolpyruvate synthase, 48251 - 50626	87 kDa	0	0	0	0	0	0	0	0	0	0	0	0	0	0	0	0	0	0	0	0	0	0	0	0	0	0	0	0	0	0	0	0	0	0	0	1	0	0	0	0	0	1	0	1	0	0	0
26	BB2AT2_2248, aconitate hydratase 2, 9535 - 12177	96 kDa	0	0	0	0	0	0	0	0	0	0	0	0	0	0	0	0	0	0	0	0	0	0	0	0	0	0	0	0	0	0	0	0	0	0	0	0	0	0	0	0	0	2	2	1	0	0	0
27	BB2AT2_1190, TonB-dependent receptor, 99312 - 101561	82 kDa	0	0	20	23	18	8	1	1	1	1	0	1	0	0	0	0	0	0	7	17	14	4	2	1	0	0	0	0	0	0	0	0	1	5	19	9	2	0	0	0	0	0	0	1	0	0	0
28	BB2AT2_1393, dihydrolipoyl dehydrogenase, 126599 - 128026	50 kDa	0	0	0	0	0	0	0	2	0	0	0	0	0	0	0	0	0	0	0	0	0	0	0	2	0	0	0	0	0	0	0	0	0	0	1	3	1	1	3	0	0	0	0	0	0	0	0
29	BB2AT2_1028, glycine dehydrogenase, 110554 - 113445	105 kDa	0	0	0	0	0	0	0	0	0	0	0	0	0	0	0	0	0	0	0	0	0	0	0	0	0	0	0	0	0	0	1	0	0	0	0	0	0	0	0	0	0	0	0	0	0	0	0
30	BB2AT2_0005, putative lipoprotein, 6611 - 9634	103 kDa	0	0	0	0	0	0	0	0	0	0	0	0	0	0	0	0	0	0	0	0	0	0	0	0	0	0	0	0	0	0	0	0	0	0	0	0	0	0	0	0	0	0	0	0	0	0	0
31	BB2AT2_1029, glycine cleavage system H protein, 113600 - 113989	14 kDa	0	0	0	0	0	0	0	0	0	0	0	0	0	0	0	0	0	0	0	0	0	0	0	0	0	0	0	0	0	0	0	0	0	0	0	0	0	0	0	0	0	0	0	0	0	0	0
32	BB2AT2_1892, 2-Cys peroxiredoxin BAS1, ic, 84766 - 85371	22 kDa	0	0	2	0	0	0	1	0	0	0	0	0	0	0	0	0	0	0	0	0	0	1	0	0	0	0	0	0	0	0	0	0	0	0	0	0	0	0	0	1	0	0	1	2	1	0	0
33	BB2AT2_2361, SapC family protein, 52109 - 52816	27 kDa	0	0	0	0	0	0	0	0	0	0	0	0	0	0	0	0	0	0	0	0	0	0	0	0	1	0	0	0	0	0	0	0	0	0	0	0	0	0	0	0	0	0	0	0	0	0	0
34	BB2AT2_3599, isopenicillin N synthase, 13007 - 13846	31 kDa	0	0	0	0	0	0	0	0	0	0	0	0	0	0	0	0	0	0	0	0	0	0	0	0	0	2	15	0	0	0	0	0	0	0	0	0	0	0	0	0	34	40	6	0	0	0	0
35	BB2AT2_0556, TonB-dependent receptor, 176587 - 179208	94 kDa	0	0	12	20	17	6	2	1	4	0	0	0	0	0	0	0	0	2	7	18	10	4	1	1	0	0	0	0	0	0	0	0	1	8	13	8	1	0	0	0	0	0	0	0	0	0	0
36	BB2AT2_2512, ribosomal protein S2, 29549 - 30277	27 kDa	0	0	0	0	4	0	0	0	0	0	0	0	0	0	0	0	0	0	0	5	4	2	0	0	0	0	0	0	1	0	0	0	0	0	5	6	2	1	0	0	0	1	0	2	1	0	0
37	BB2AT2_2331, amidohydrolase family protein, 16701 - 19877	118 kDa	0	0	6	0	0	0	0	0	0	0	0	0	0	0	2	0	0	0	7	0	0	0	0	0	0	0	0	0	0	0	0	0	0	6	1	0	0	0	0	0	0	0	0	0	0	0	0
38	BB2AT2_0925, peptidase B, 861 - 2156	46 kDa	0	0	0	1	0	0	1	0	0	0	0	0	0	0	0	0	0	0	0	0	0	0	0	0	0	0	0	0	0	0	0	0	0	0	0	0	0	0	0	0	0	0	1	2	0	0	0
39	BB2AT2_0602, Zn-dependent peptidase, 38199 - 41090	109 kDa	1	2	1	0	1	3	3	3	1	3	1	1	1	0	1	0	1	3	1	1	0	2	2	3	2	1	1	1	1	1	1	1	1	3	3	2	3	3	3	1	1	2	1	1	1	1	1
40	BB2AT2_3573, zinc carboxypeptidase domain-containing protein, 34101 - 35228	43 kDa	0	0	0	0	0	0	0	0	0	0	0	0	0	0	0	0	0	0	0	0	0	0	0	0	0	0	0	0	0	0	0	0	0	0	0	0	0	0	0	0	0	1	0	0	0	0	0
41	BB2AT2_3986, adenylosuccinate synthetase, 19472 - 20785	47 kDa	0	0	0	0	0	0	0	0	0	0	0	0	0	0	0	0	0	0	1	0	0	0	0	0	0	0	0	0	0	0	0	0	0	0	1	1	0	0	0	0	0	2	1	0	1	0	0
42	BB2AT2_2629, chaperone protein HtpG, 69954 - 71867	73 kDa	0	0	0	0	0	0	0	0	0	0	0	0	0	0	0	0	0	0	0	0	0	0	0	0	0	0	0	0	0	0	0	0	0	0	0	0	0	1	1	0	0	0	0	0	1	0	0
43	BB2AT2_3872, phosphoenolpyruvate carboxykinase (ATP), 1956 - 3494	56 kDa	0	0	0	0	0	0	0	0	0	0	0	0	0	0	1	0	0	0	0	0	0	0	0	0	0	0	0	0	0	0	0	0	0	0	0	0	0	0	0	0	0	0	0	0	0	0	0
44	BB2AT2_1103, outer membrane receptor protein, 4203 - 7031	105 kDa	0	0	11	18	17	3	3	0	0	0	0	0	0	0	0	0	0	0	1	17	9	2	1	0	0	0	0	0	0	0	0	0	0	2	17	7	0	0	1	0	0	0	0	0	0	0	0
45	BB2AT2_2621, superoxide dismutase (Fe), 60569 - 61150	21 kDa	0	0	0	0	0	0	0	0	0	0	0	0	0	0	0	0	0	0	0	0	0	0	0	0	0	0	0	0	0	0	0	0	0	0	0	0	0	0	0	0	0	0	1	0	0	0	0
46	BB2AT2_2037, ribosomal protein S4, 108880 - 109500	24 kDa	0	0	0	7	6	4	0	0	1	0	0	0	0	0	0	0	0	0	0	8	9	2	1	0	0	0	0	0	0	0	0	0	0	1	6	12	3	1	0	0	0	0	0	0	0	0	1
47	BB2AT2_3960, conserved hypothetical protein, 16043 - 17137	41 kDa	0	0	0	0	0	0	0	0	0	0	0	0	0	0	0	0	0	0	0	0	0	0	0	0	0	0	0	0	0	0	0	0	0	0	0	1	1	1	1	0	0	0	0	0	0	0	0
48	BB2AT2_3680, TonB-dependent receptor, 8177 - 11119	105 kDa	0	2	13	19	14	5	2	1	1	0	0	0	0	0	0	0	0	1	8	14	5	2	0	0	0	0	0	0	0	0	0	0	1	6	9	7	2	0	0	0	0	0	0	0	0	0	0
49	BB2AT2_0143, DNA gyrase, A subunit, 161159 - 163858	100 kDa	0	1	0	0	0	0	0	0	0	0	0	0	0	0	0	0	0	0	0	0	0	1	4	0	0	0	0	0	0	0	0	0	0	0	0	0	3	0	0	0	0	0	1	1	0	0	0
50	BB2AT2_3084, glutamine synthetase, type I, 8675 - 10081	52 kDa	0	0	0	0	1	0	0	0	0	0	0	0	0	0	0	0	0	0	0	0	0	0	0	0	0	0	0	0	0	0	0	0	0	0	0	0	0	0	0	0	0	0	0	0	0	0	0
51	BB2AT2_2953, NADP-dependent malic enzyme, 31 - 1272	45 kDa	1	0	0	0	0	0	0	0	0	0	0	0	0	0	0	0	0	0	0	0	0	1	0	0	0	0	0	0	0	0	0	0	0	0	0	0	0	0	0	0	0	0	0	0	0	0	0
52	BB2AT2_2786, alanine dehydrogenase, 62016 - 63137	39 kDa	0	0	0	0	0	0	0	0	0	0	0	0	0	0	0	0	0	0	0	0	0	0	0	0	0	0	0	0	0	0	0	1	0	0	0	0	0	0	0	0	0	0	0	0	0	0	0
53	BB2AT2_4151, catalase/peroxidase HPI, 7726 - 9906	81 kDa	0	0	0	0	0	0	0	0	0	0	0	0	0	0	0	0	0	0	0	0	0	0	0	0	0	0	0	0	0	0	0	0	0	0	0	0	0	0	0	0	0	0	0	0	0	0	0
54	BB2AT2_1728, TonB-dependent receptor, 40720 - 43302	93 kDa	0	0	6	16	13	9	1	0	1	0	0	0	0	0	0	0	0	0	2	12	10	4	1	1	0	0	0	0	0	0	0	0	1	2	15	6	0	0	0	0	0	0	0	0	0	0	0
55	BB2AT2_1874, TonB-dependent receptor, 70932 - 72830	69 kDa	0	1	7	15	10	3	2	1	2	0	0	0	0	0	0	0	0	1	5	9	8	4	0	2	0	0	0	0	0	0	0	0	0	6	8	4	1	0	0	0	0	0	0	1	0	0	0
56	BB2AT2_2892, aminopeptidase, 20209 - 22641	94 kDa	0	0	0	0	0	1	0	0	0	0	0	0	0	0	0	0	0	0	0	0	0	1	1	0	0	0	0	0	1	0	0	0	0	0	1	0	0	0	0	0	0	0	0	0	0	0	0
57	BB2AT2_3958, dTDP-glucose 4,6-dehydratase, 11169 - 12254	40 kDa	1	1	0	1	0	1	1	0	0	0	0	0	1	0	0	0	1	2	1	1	0	1	0	0	0	1	1	1	1	0	0	1	0	0	0	0	0	1	1	0	1	0	1	1	1	0	0
58	BB2AT2_3366, delta-aminolevulinic acid dehydratase, 30111 - 31121	37 kDa	0	0	0	0	0	0	0	0	0	0	0	0	0	0	0	0	0	0	0	0	0	0	0	0	0	0	0	1	0	0	0	0	0	0	0	0	0	0	0	0	0	0	0	0	0	0	0
59	BB2AT2_2300, transcription termination/antitermination factor NusG, 72060 - 72617	21 kDa	0	0	0	0	0	0	0	0	0	0	0	0	0	0	0	0	0	0	0	0	0	0	0	0	0	0	0	2	2	1	0	0	0	0	0	0	0	0	0	0	0	0	13	44	41	22	7
60	BB2AT2_2233, dipeptidyl peptidase IV, 84193 - 85827	63 kDa	0	0	0	0	0	1	0	0	0	0	0	0	0	0	0	0	0	0	0	8	8	5	4	8	1	0	0	0	0	0	0	1	0	0	2	9	12	9	10	1	0	0	0	0	0	1	0
61	BB2AT2_2230, putativeaminopeptidase W07G4.4, 80658 - 82193	?	0	0	0	0	0	0	0	0	0	0	0	0	0	0	0	0	0	0	0	0	0	0	0	0	0	0	0	0	0	0	0	0	0	0	0	0	0	0	0	0	0	0	0	0	0	1	0
62	BB2AT2_0768, glutamyl-tRNA synthetase, 21285 - 22769	56 kDa	0	0	0	0	0	0	0	0	0	0	0	0	0	0	0	0	0	0	0	0	0	0	0	0	0	0	0	0	0	0	0	0	0	0	0	0	0	0	0	0	0	0	0	0	0	0	0
63	BB2AT2_0248, glycogenphosphorylase, 59668 - 62205	?	0	0	0	0	0	0	0	0	0	0	0	0	0	0	0	0	0	0	0	0	0	0	0	0	0	0	0	0	0	0	0	0	0	0	0	0	0	0	0	0	0	0	0	0	0	0	0
64	BB2AT2_2514, UMP kinase, 31387 - 32136	27 kDa	1	0	0	1	0	0	0	0	0	0	0	0	0	0	0	0	0	0	0	0	0	0	0	0	0	0	0	0	0	0	0	0	0	0	0	0	0	0	0	0	0	0	0	0	0	0	0
65	BB2AT2_3192, transaldolase, 41688 - 42638	35 kDa	0	0	0	0	0	0	0	0	0	0	0	0	0	0	0	0	0	0	0	0	0	0	0	0	0	0	0	0	0	0	0	0	0	0	0	0	0	0	0	0	0	0	0	0	0	0	0
66	BB2AT2_3106, ribosomal protein S3, 29046 - 29747	26 kDa	0	0	0	4	3	0	0	0	0	0	0	0	0	0	0	0	0	0	0	2	4	0	0	0	0	0	0	0	0	0	0	0	0	0	6	7	1	0	0	0	0	0	0	0	0	0	0
67	BB2AT2_0027, methionyl-tRNA synthetase, 31750 - 33771	76 kDa	0	0	0	0	0	0	0	0	0	0	0	0	0	0	0	0	0	0	0	0	0	0	0	0	0	0	0	0	0	0	0	0	0	0	0	0	0	0	0	0	0	0	1	0	0	0	0
68	BB2AT2_3295, isoleucine--tRNA ligase, 19437 - 22109	99 kDa	0	0	0	0	0	0	0	0	0	0	0	0	0	0	0	0	0	0	0	0	1	0	0	0	0	0	0	0	0	0	0	0	0	0	0	1	0	0	0	0	0	0	0	0	0	0	0
69	BB2AT2_1829, twin-arginine translocation pathway signal, 20771 - 23032	82 kDa	0	0	0	0	0	0	0	0	3	49	13	1	0	0	0	0	0	0	0	0	0	0	0	0	5	66	16	1	0	0	0	0	0	0	0	0	0	0	0	0	5	0	0	0	0	0	0
70	BB2AT2_2776, isocitrate dehydrogenase, NADP-dependent, 51552 - 53774	81 kDa	0	0	0	0	0	0	0	0	0	0	0	0	0	1	0	0	0	0	0	0	0	0	0	0	0	0	0	0	1	1	0	0	0	0	0	1	0	0	0	0	0	0	5	4	4	5	1
71	BB2AT2_2337, fumaratehydratase, class I, 26337 - 27863	?	0	0	0	0	0	0	0	0	1	0	0	0	0	0	0	0	0	0	1	0	0	0	0	1	0	0	0	0	0	0	0	0	0	0	0	0	0	0	0	0	0	0	0	0	0	0	0
72	BB2AT2_2173, cytosol aminopeptidase, 30314 - 31825	55 kDa	1	0	0	0	0	0	0	0	0	0	0	0	0	0	1	0	0	0	1	0	0	0	0	0	0	0	0	0	0	0	0	0	0	0	0	0	0	0	0	0	0	0	0	0	0	0	0
73	BB2AT2_1566, phosphoglucomutase, alpha-D-glucose phosphate-specific, 139482 - 141119	60 kDa	0	0	0	0	0	0	0	0	0	0	0	0	0	0	0	0	0	0	0	0	0	0	0	0	0	0	0	0	0	0	0	0	0	0	0	0	0	0	0	0	0	0	0	0	0	0	0
74	BB2AT2_4043, protease, 7337 - 10558	121 kDa	0	0	1	0	0	0	0	0	0	0	0	0	0	1	0	1	0	0	1	0	0	0	0	0	0	0	0	0	0	1	0	1	0	0	0	0	0	0	0	0	0	0	0	0	0	0	0
75	BB2AT2_2336, leucine dehydrogenase, 24846 - 25886	37 kDa	0	0	0	0	0	0	0	0	0	0	0	0	0	0	0	0	0	0	0	0	0	0	0	0	0	0	0	0	0	1	0	0	0	0	0	0	0	0	0	0	0	0	0	0	0	0	0
76	BB2AT2_1984, protein YhgF, 58531 - 60852	85 kDa	0	0	0	0	0	0	0	0	0	0	0	0	0	0	0	0	0	0	0	0	2	0	0	1	10	4	0	0	0	0	0	0	0	0	0	0	0	0	0	0	0	1	0	0	2	0	0
77	BB2AT2_3488, stringent starvation protein A, 44343 - 44969	24 kDa	0	0	0	0	0	0	0	0	0	0	0	0	0	0	0	0	0	0	0	0	0	0	0	0	0	0	0	0	0	0	0	0	0	0	0	0	0	0	0	0	0	0	0	0	0	0	0
78	BB2AT2_2089, NirV, 50273 - 51232	35 kDa	0	0	0	0	0	0	0	0	0	1	0	69	47	6	0	0	0	0	0	0	0	0	0	0	0	0	0	14	2	0	0	0	0	0	0	0	0	0	0	0	0	0	0	0	0	0	0
79	BB2AT2_2698, adenylosuccinate lyase, 62320 - 63690	52 kDa	0	0	0	0	0	0	0	0	0	0	0	0	0	0	0	0	0	0	0	0	0	0	0	0	0	0	0	0	0	0	0	0	0	0	0	0	0	0	0	0	0	0	0	0	0	0	0
80	BB2AT2_0418, aspartate aminotransferase, 39316 - 40506	44 kDa	0	0	0	0	0	0	0	0	0	0	0	0	0	0	0	0	0	0	0	0	0	0	0	0	0	0	0	0	0	0	0	0	0	0	0	0	0	0	0	0	0	0	1	0	0	0	0
81	BB2AT2_2674, conserved hypothetical protein, 40831 - 42195	52 kDa	0	0	0	0	0	0	0	0	0	0	0	0	0	0	0	0	0	0	0	0	0	0	0	0	0	0	0	0	0	0	0	0	0	0	0	0	0	0	0	0	0	2	4	0	0	16	6
82	BB2AT2_1372, protein-export chaperone SecB, 103761 - 104246	18 kDa	0	0	0	0	0	0	0	0	0	0	0	0	0	0	0	0	0	0	0	0	0	0	0	0	0	0	0	0	0	0	0	0	0	0	0	0	0	0	0	0	0	0	0	0	0	0	0
83	BB2AT2_2060, single-stranded DNA-binding protein, 23532 - 24230	25 kDa	0	0	2	2	2	5	2	2	0	0	0	0	0	0	0	0	0	0	1	2	4	4	2	3	0	0	0	0	0	0	0	0	0	2	3	3	3	3	2	0	0	0	0	0	0	0	0
84	BB2AT2_2024, 50S ribosomal protein L5, 103183 - 103725	20 kDa	0	0	0	1	7	0	0	0	0	0	0	0	0	0	0	0	0	0	0	4	6	0	1	0	0	0	0	0	0	0	0	0	0	0	6	11	0	0	0	0	0	0	0	0	0	0	0
85	BB2AT2_2702, aminopeptidase, 66014 - 67417	51 kDa	0	0	0	0	0	0	0	0	0	0	0	0	0	0	0	0	0	0	0	0	0	0	1	3	10	6	0	1	1	0	0	0	0	0	2	11	14	21	21	18	18	5	0	1	0	0	1
86	BB2AT2_0558, TonB-dependent receptor, 180603 - 183236	96 kDa	0	0	7	13	6	1	0	0	0	0	0	0	0	0	0	0	0	0	1	9	3	0	0	0	0	0	0	0	0	0	0	0	0	1	5	4	0	0	0	0	0	0	0	0	0	0	0
87	BB2AT2_3264, ATP synthase F1, gamma subunit, 49825 - 50685	31 kDa	0	0	0	0	1	0	0	0	0	0	0	0	1	1	0	0	0	0	0	0	1	0	0	0	0	0	0	0	1	0	0	0	0	0	1	1	0	0	0	0	0	0	0	0	1	0	1
88	BB2AT2_0075, phosphogluconate dehydratase, 88626 - 90476	66 kDa	0	0	0	0	0	0	0	0	0	0	0	0	0	0	0	0	0	0	0	0	0	0	0	0	0	0	0	0	0	0	0	0	0	0	0	0	0	0	0	0	0	0	0	0	0	0	0
89	BB2AT2_0345, putativesecreted protein, 160631 - 162238	?	0	0	2	9	3	4	1	1	2	2	1	1	0	0	0	0	0	1	0	2	1	0	0	0	0	0	0	0	1	0	0	0	0	1	1	1	1	1	1	0	0	1	1	0	0	0	0
90	BB2AT2_1052, aminopeptidase, 133214 - 135787	96 kDa	0	0	0	0	2	0	1	0	0	0	0	0	0	0	0	0	0	0	0	11	14	5	2	0	0	7	9	2	0	0	0	0	0	0	2	10	7	2	3	0	14	12	5	0	0	0	0
91	BB2AT2_3678, DNA protection during starvation protein, 7469 - 7942	18 kDa	0	0	0	0	0	0	0	0	0	0	0	0	0	0	0	0	0	0	0	0	0	0	0	0	0	0	0	0	0	0	0	0	0	0	0	0	0	0	0	0	0	0	0	0	0	0	0
92	BB2AT2_0470, translation initiation factor IF-2, 88789 - 91446	97 kDa	0	0	0	0	0	0	0	0	0	0	0	1	1	1	0	0	0	0	0	0	0	0	0	0	0	0	0	2	1	0	0	0	0	0	0	0	0	0	0	0	0	0	6	5	0	0	1
93	BB2AT2_0291, aminopeptidase N family protein 106218 - 107984	66 kDa	0	0	0	0	0	1	2	0	0	0	0	0	0	0	0	0	0	0	0	0	0	0	1	0	0	0	0	0	0	0	0	0	0	0	1	0	9	12	2	0	0	0	0	0	0	0	0
94	BB2AT2_4167, TonB-dependent receptor, 33 - 2111	77 kDa	0	0	2	14	9	1	0	0	0	0	0	0	0	0	0	0	0	0	2	10	5	0	0	0	0	0	0	0	0	0	0	0	0	1	9	3	0	0	0	0	0	0	0	0	0	0	0
95	BB2AT2_2324, dihydroorotase, homodimeric type, 9462 - 10511	38 kDa	0	0	0	0	0	0	0	0	0	0	19	8	0	0	0	0	0	0	0	0	0	0	0	7	34	9	7	9	2	0	0	0	0	0	0	0	0	0	6	12	4	0	11	3	0	0	0
96	BB2AT2_3016, lipoprotein, 6659 - 8503	70 kDa	0	0	7	4	3	0	0	0	0	0	20	1	0	0	0	0	0	0	1	2	5	0	0	0	0	0	4	0	0	0	0	0	0	3	4	2	1	0	0	0	0	0	0	0	0	0	0
97	BB2AT2_4133, peptidase S9 prolyl oligopeptidase, 8568 - 11327	104 kDa	0	0	0	0	0	0	0	0	0	0	0	0	0	0	0	0	0	0	0	0	0	0	0	0	0	0	0	0	0	0	0	0	0	0	0	0	0	4	12	0	0	0	0	1	0	0	0
98	BB2AT2_1314, phosphate transport regulator, 47671 - 48348	26 kDa	0	0	0	0	1	0	0	0	0	0	0	0	0	0	0	0	0	0	0	0	0	0	0	0	0	0	0	0	0	0	0	0	0	0	0	0	0	0	0	0	0	0	0	0	0	0	0
99	BB2AT2_2305, ribosomal protein L7/L12, 74861 - 75223	12 kDa	0	0	0	0	0	0	0	0	0	0	0	0	0	1	0	0	0	0	0	0	0	0	0	0	0	0	0	0	2	1	0	0	0	0	0	0	0	0	0	0	0	0	0	3	3	2	0
100	BB2AT2_2645, succinate dehydrogenase iron-sulfur subunit, 9749 - 10465	27 kDa	0	0	0	0	0	0	0	0	0	0	0	0	0	0	0	0	0	0	0	1	0	0	0	0	0	0	0	0	0	0	0	0	0	0	0	1	0	0	0	1	0	2	0	0	3	1	0
101	BB2AT2_2506, pterin-4-alpha-carbinolamine dehydratase, 22182 - 22526	13 kDa	0	0	0	0	0	0	0	0	0	0	0	0	0	0	0	0	0	0	0	0	0	0	0	0	0	0	0	0	0	0	0	0	0	0	0	0	0	0	0	0	1	0	2	1	1	0	0
102	BB2AT2_2643, dihydrolipoyllysine-residue succinyltransferase, E2 component of oxoglutarate dehydrogenase (succinyl-transferring) complex, 5313 - 6836	54 kDa	0	0	0	0	1	0	0	0	0	0	0	0	0	0	0	0	0	0	0	2	1	0	0	0	0	0	0	0	0	0	0	0	0	0	9	10	3	3	3	1	2	0	0	0	0	0	0
103	BB2AT2_0650, leucyl aminopeptidase, 88568 - 89929	50 kDa	0	0	0	0	0	0	0	0	0	0	0	0	0	0	0	1	0	0	0	0	0	0	0	0	0	0	1	0	0	0	0	1	0	0	0	0	0	0	0	0	0	1	0	0	0	0	0
104	BB2AT2_2487, trigger factor, 426 - 1730	48 kDa	0	0	0	0	0	0	0	0	0	0	0	0	0	0	0	0	0	0	0	0	0	0	0	0	0	0	0	0	1	0	0	0	0	0	0	0	0	0	1	0	2	2	3	2	3	3	1
105	BB2AT2_0236, conserved hypothetical protein, 44573 - 45376	30 kDa	0	0	0	0	0	0	0	0	0	0	0	0	0	0	0	0	0	0	0	0	0	0	0	0	0	0	0	0	0	0	0	0	0	0	0	0	0	0	0	0	0	0	0	0	0	0	0
106	BB2AT2_1187, trehalase, 95103 - 96605	57 kDa	0	0	0	0	0	0	0	0	0	1	0	0	0	1	1	0	0	0	0	0	1	0	0	0	0	22	18	0	0	0	0	0	0	0	0	2	3	0	0	0	19	10	0	0	0	0	0
107	BB2AT2_4199, elongation factor Tu 2, 3606 - 4091 (+1)	18 kDa	0	0	0	0	0	0	0	0	0	0	0	0	0	0	0	0	0	0	0	0	0	0	0	0	0	0	0	0	0	0	0	0	0	1	0	0	1	0	0	0	0	0	0	0	0	0	0
108	BB2AT2_3330, fumarylacetoacetase, 56773 - 58086	48 kDa	0	0	0	0	0	0	0	0	0	0	0	0	0	0	1	0	0	0	0	0	0	0	0	0	0	0	0	0	0	0	0	0	0	0	0	0	0	0	4	1	0	1	1	0	0	0	0
109	BB2AT2_1709, TonB-dependent receptor, 14311 - 16584	83 kDa	0	0	6	12	8	3	0	1	0	0	0	0	0	0	0	0	0	0	1	7	2	1	1	0	0	0	0	0	0	0	0	0	0	2	7	0	1	0	0	0	0	0	0	0	0	0	0
110	BB2AT2_2628, adenylate kinase, 69127 - 69771	23 kDa	0	0	0	0	0	0	0	0	0	0	0	0	0	0	0	0	0	0	0	0	0	0	0	0	0	0	0	0	0	0	0	0	0	0	0	0	0	0	0	0	0	0	0	0	0	0	0
111	BB2AT2_2235, nudix hydrolase 3, 86979 - 88679	63 kDa	0	0	0	0	1	0	0	0	10	4	0	1	0	1	0	0	0	0	1	0	4	0	0	0	2	3	0	0	0	0	0	0	0	0	4	3	0	0	0	7	4	0	0	0	0	0	0
112	BB2AT2_3956, dTDP-4-dehydrorhamnose 3,5-epimerase, 8845 - 9390	21 kDa	0	0	0	0	0	0	0	0	0	0	0	0	0	0	0	0	0	0	0	0	0	0	0	0	0	0	0	0	0	0	0	0	0	0	0	0	0	0	0	10	9	1	1	0	0	0	0
113	BB2AT2_2029, ribosomal protein S5, 105372 - 105878	18 kDa	0	0	0	1	2	0	0	0	0	0	0	0	0	0	0	0	0	0	0	1	1	0	0	0	0	0	0	0	0	0	0	0	0	1	2	4	2	0	0	0	0	0	0	0	0	1	0
114	BB2AT2_2647, succinate dehydrogenase flavoprotein subunit, 10694 - 12247	56 kDa	0	0	0	0	0	0	0	0	0	0	0	0	0	0	0	0	0	0	0	0	0	0	0	0	0	0	0	0	0	0	0	1	0	0	0	0	0	0	0	0	0	0	0	0	0	0	0
115	BB2AT2_1925, peptidyl-prolyl cis-trans isomerase, fkbp-type, 4333 - 5079	27 kDa	0	0	2	3	3	0	0	0	0	0	3	1	0	0	0	0	0	0	2	3	3	0	0	0	0	0	1	0	0	0	0	0	0	2	4	3	1	0	0	0	0	0	0	0	0	0	0
116	BB2AT2_3110, ribosomal protein, L4/L1 family, 31542 - 32147	22 kDa	0	1	0	1	3	1	0	0	0	0	0	0	0	0	0	0	0	0	0	1	2	1	0	0	0	0	0	0	0	0	0	0	0	0	1	2	2	0	0	0	0	0	0	0	1	0	0
117	BB2AT2_3971, chaperonin GroS, 4890 - 5177	10 kDa	0	0	0	0	0	0	0	0	0	0	0	0	0	0	0	0	0	0	0	0	0	0	0	0	0	0	0	0	0	0	0	0	0	0	0	0	0	0	0	0	0	0	0	0	0	0	0
118	BB2AT2_1492, enzymatic protein, 59093 - 61597	93 kDa	1	0	6	5	1	3	0	0	0	0	0	0	0	0	0	0	1	0	1	5	1	1	0	0	0	0	0	0	0	0	0	0	0	2	3	1	1	0	0	0	0	0	0	0	0	1	1
119	BB2AT2_3339, leukotriene A-4 hydrolase, 3480 - 5324	69 kDa	0	0	0	0	0	0	0	0	0	0	0	0	0	0	0	0	0	0	0	0	0	0	0	0	0	0	0	0	0	0	0	0	0	0	2	6	3	0	0	0	25	17	9	2	0	0	0
120	BB2AT2_2482, conserved hypothetical protein, 79965 - 80378	15 kDa	0	0	0	0	0	0	0	0	0	0	0	0	1	0	0	0	0	0	0	0	0	0	0	0	0	0	0	0	0	0	0	0	0	0	0	0	0	0	0	0	0	0	0	0	0	0	0
121	BB2AT2_0715, peptidase S9 prolyl oligopeptidase active site domain protein, 160605 - 163070	92 kDa	0	0	0	0	1	0	0	0	0	0	0	0	0	1	0	0	0	0	0	0	0	0	0	0	0	0	0	0	0	0	0	0	0	0	0	0	4	3	12	3	0	0	0	0	0	0	0
122	BB2AT2_2508, 2,3,4,5-tetrahydropyridine-2,6-dicarboxylate N-succinyltransferase, 24967 - 25794	30 kDa	0	0	0	0	0	0	0	0	0	0	0	0	0	0	0	0	0	0	0	0	0	0	0	0	0	0	0	0	0	0	0	0	0	0	0	0	0	0	0	0	0	0	0	0	0	0	0
123	BB2AT2_1391, pyruvatedehydrogenase (acetyl-transferring), homodimeric type, 121836 - 124502	?	0	0	0	0	0	0	0	0	0	0	0	0	0	0	0	0	0	0	0	0	0	0	0	0	0	0	0	0	0	0	0	0	0	0	0	1	0	0	0	0	1	1	1	1	1	0	1
124	BB2AT2_2101, oligopeptidase A, 65513 - 67564	77 kDa	0	0	0	0	0	0	0	0	0	0	0	0	0	0	0	0	0	0	0	0	0	0	0	0	0	0	0	0	0	0	0	0	0	0	0	0	2	0	0	0	0	0	0	0	0	0	0
125	BB2AT2_1552, prolyl-tRNA synthetase, 121743 - 123467	64 kDa	0	0	0	1	0	0	0	0	0	0	0	0	0	0	1	0	0	0	0	0	0	0	0	0	0	0	0	1	0	0	0	0	0	0	0	0	0	0	0	0	0	0	0	0	0	0	0
126	BB2AT2_1755, ribonuclease E, 68027 - 71191	117 kDa	0	0	0	0	0	0	0	0	0	0	0	0	0	0	0	0	0	0	0	0	1	0	0	0	0	0	0	0	0	0	0	0	0	0	1	1	2	1	0	0	0	0	0	0	1	1	0
127	BB2AT2_2035, 30S ribosomal protein S13, 108103 - 108459	13 kDa	0	0	0	2	1	1	1	0	0	0	0	0	0	0	0	0	1	0	1	3	2	2	1	0	0	0	0	0	0	0	0	0	0	0	2	3	3	0	0	0	0	0	0	2	2	1	0
128	BB2AT2_1746, ferric enterobactin receptor, 57035 - 59953	105 kDa	0	0	8	10	5	1	1	0	0	0	0	0	0	0	0	0	0	0	4	5	3	0	0	0	0	0	0	0	0	0	0	0	0	1	5	1	0	0	0	0	0	0	0	1	0	1	0
129	BB2AT2_3043, chaperone SurA, 40373 - 41668	48 kDa	0	0	0	1	0	0	0	0	0	0	1	1	0	0	0	0	0	0	0	0	0	0	0	0	0	0	5	4	1	0	0	0	0	0	0	0	0	0	0	0	34	11	4	1	0	0	1
130	BB2AT2_2652, citrate synthase, 14329 - 14661	13 kDa	0	0	0	0	0	0	0	0	0	0	0	0	0	0	0	0	0	0	0	0	0	0	0	0	0	0	0	0	0	0	0	0	0	0	0	0	0	0	0	0	0	0	0	0	0	0	0
131	BB2AT2_2259, alpha-galactosidase, 24029 - 26161	80 kDa	0	0	0	0	0	0	0	0	0	0	0	0	0	0	0	0	0	0	0	0	0	0	0	0	0	0	0	0	0	0	0	0	0	0	0	0	0	0	0	0	1	2	0	0	0	0	0
132	BB2AT2_2322, TonB system biopolymer transport component, 7190 - 7969	29 kDa	0	0	0	0	4	0	0	0	0	0	0	0	0	0	0	0	0	0	1	5	11	1	0	0	0	0	0	0	0	0	0	0	0	1	4	6	1	1	1	0	1	2	3	1	1	0	1
133	BB2AT2_3492, ribosomal protein L25, Ctc-form, 2502 - 3116	22 kDa	0	0	0	0	0	0	0	0	0	0	0	0	0	0	0	0	0	0	0	0	0	0	0	0	0	0	0	0	0	0	0	0	0	0	0	0	0	0	0	0	0	1	1	2	0	0	0
134	BB2AT2_0327, TonB-dependent receptor, plug, 141825 - 144242	90 kDa	0	0	4	7	5	2	0	0	1	0	0	0	0	0	0	0	0	0	3	6	2	0	0	0	0	0	0	0	0	0	1	0	0	2	6	1	1	0	0	0	0	0	0	0	0	1	0
135	BB2AT2_2972, preprotein translocase, SecA subunit, 23243 - 25951	102 kDa	0	0	0	0	0	0	0	0	0	0	0	0	0	0	0	0	0	0	0	0	0	0	0	0	0	0	0	0	1	0	0	0	0	0	0	0	0	0	0	0	0	0	0	0	0	0	0
136	BB2AT2_1392, dihydrolipoyllysine-residue acetyltransferase E2 component of pyruvate dehydrogenase complex, 124513 - 126423	67 kDa	0	0	0	0	0	0	0	0	0	0	0	0	0	0	0	0	0	0	1	2	4	1	0	0	0	0	0	0	0	0	0	0	0	0	4	2	1	0	1	0	0	0	0	0	0	0	0
137	BB2AT2_0782, inosine-5'-monophosphate dehydrogenase, 36255 - 37724	52 kDa	0	1	0	0	0	0	0	0	0	0	0	0	0	0	0	0	0	0	0	0	0	0	0	0	0	0	0	0	0	0	0	0	0	0	0	0	0	0	0	0	0	0	0	0	0	0	0
138	BB2AT2_2188, 2',3'-cyclic-nucleotide 2'-phosphodiesterase, 43716 - 45785	75 kDa	0	0	0	1	0	0	2	0	0	0	0	0	0	0	0	0	0	0	0	0	0	0	0	0	0	0	0	0	0	0	0	0	0	0	0	0	0	0	0	0	0	0	0	0	0	0	0
139	BB2AT2_1572, ferric uptake regulation protein, 144144 - 144587	17 kDa	0	0	0	0	0	0	0	0	0	0	0	0	0	0	0	0	0	0	0	0	0	0	0	0	0	0	0	0	0	0	0	0	0	0	0	0	0	0	0	0	0	0	0	0	0	0	0
140	BB2AT2_2963, regulator of ribonuclease activity A, 11116 - 11613	18 kDa	0	0	0	0	0	0	0	0	0	0	0	0	0	0	0	0	0	0	0	0	0	0	0	0	0	0	0	0	0	0	0	0	0	0	0	0	0	0	0	0	0	0	0	0	0	0	0
141	BB2AT2_2644, oxoglutarate dehydrogenase (succinyl-transferring), E1 component, 6840 - 9659	105 kDa	0	0	0	0	0	0	1	0	0	0	0	0	0	0	0	0	0	0	0	0	0	0	0	0	0	0	0	0	0	0	0	0	0	0	0	1	0	0	0	0	0	0	0	0	0	0	0
142	BB2AT2_2640, conserved hypothetical protein, 1963 - 3033	42 kDa	0	0	0	0	2	1	0	0	0	0	1	0	0	0	0	0	0	0	1	7	16	9	2	1	1	2	1	1	0	0	0	0	0	1	7	10	6	4	3	0	0	0	0	0	0	1	0
143	BB2AT2_2597, carbamoyl-phosphate synthase, large subunit, 34379 - 37597	118 kDa	0	0	0	0	0	0	0	0	0	0	0	0	0	0	0	0	0	0	0	0	0	0	0	0	0	0	0	0	0	0	0	2	0	0	0	0	0	0	0	0	0	0	0	0	1	0	0
144	BB2AT2_3687, conserved hypothetical protein, 20310 - 22820	93 kDa	0	0	0	0	0	0	0	0	0	0	0	0	0	0	0	0	0	0	0	1	1	1	0	0	0	0	0	0	0	0	0	0	0	0	0	0	0	0	0	0	0	0	0	0	0	0	0
145	BB2AT2_0206, TonB-dependent receptor, 11339 - 14179	103 kDa	0	0	4	12	4	0	0	0	0	0	0	0	0	0	0	0	0	0	0	6	4	0	0	0	0	0	0	0	0	0	0	0	0	0	4	1	0	0	0	0	0	0	0	0	0	0	0
146	BB2AT2_3145, glutathione synthase, 1116 - 2066	35 kDa	0	0	0	0	0	0	0	0	0	0	0	0	0	0	0	0	0	0	0	0	0	0	0	0	0	0	0	0	0	0	0	0	0	0	0	0	0	0	0	0	0	0	0	1	0	0	0
147	BB2AT2_2276, acetylornithine aminotransferase, 45551 - 46756	43 kDa	0	0	0	0	1	0	0	0	0	0	0	0	0	0	0	0	0	0	0	0	1	0	0	0	0	0	0	0	0	0	0	0	0	0	0	1	0	0	0	0	0	1	0	4	0	0	0
148	BB2AT2_0786, GMP synthase, 38904 - 39401	19 kDa	0	0	0	0	0	0	0	0	0	0	0	0	0	0	0	0	0	0	0	0	0	0	0	0	0	0	0	0	0	0	1	0	0	0	0	0	0	0	0	0	0	0	0	0	0	0	0
149	BB2AT2_3066, UTP-glucose-1-phosphate uridylyltransferase, 61144 - 62064	33 kDa	0	0	0	0	0	0	0	0	0	0	0	0	0	0	0	0	0	0	0	0	0	0	0	0	0	0	0	0	0	0	0	0	0	0	0	1	0	0	0	0	0	0	0	0	1	0	0
150	BB2AT2_0932, 3-methyl-2-oxobutanoate hydroxymethyltransferase, 6709 - 7503	28 kDa	0	0	0	0	0	0	0	0	0	0	0	0	0	0	0	0	0	0	0	0	0	0	0	0	0	0	1	1	0	0	0	0	0	0	0	0	11	12	2	0	0	0	0	0	0	0	0
151	BB2AT2_1425, TonB-dependent receptor, 157520 - 159961	89 kDa	0	0	7	12	4	0	0	1	0	0	0	0	0	0	0	0	0	0	3	7	4	0	0	0	0	0	0	0	0	0	0	0	0	4	4	2	1	0	0	0	0	0	0	0	0	0	0
152	BB2AT2_0633, uridine phosphorylase, 73197 - 73952	27 kDa	0	0	0	0	0	0	0	0	0	0	0	0	0	0	0	0	0	0	0	0	0	0	0	0	0	0	0	0	0	0	0	0	0	0	0	0	0	0	0	0	0	0	0	0	0	0	0
153	BB2AT2_2641, succinyl-CoA ligase, alpha subunit, 3097 - 3969	30 kDa	0	0	0	0	0	0	0	0	0	0	0	0	0	0	0	0	0	0	0	0	0	0	0	0	0	0	0	0	0	0	0	0	0	0	0	0	0	0	0	0	0	2	2	1	0	0	0
154	BB2AT2_3458, extracellular metal-dependent peptidase, 18786 - 21215	90 kDa	0	0	0	1	0	0	3	3	1	0	0	0	0	0	0	0	0	0	0	0	1	6	8	10	0	0	0	0	0	0	0	0	0	0	1	3	16	13	4	0	0	0	0	1	0	0	0
155	BB2AT2_0580, membrane-bound aldehyde dehydrogenase (pyrroloquinoline-quinone), 15785 - 18076	82 kDa	0	0	0	0	0	0	0	0	0	0	0	0	0	0	0	0	0	0	0	0	0	0	0	0	15	2	0	0	0	0	0	0	0	0	0	0	0	0	0	46	23	2	0	0	0	0	0
156	BB2AT2_0061, DNA topoisomerase I, 66490 - 69189	101 kDa	0	0	0	0	1	0	0	0	0	0	0	0	0	0	0	0	0	0	0	0	3	0	0	0	0	0	0	0	0	1	0	0	0	0	1	0	0	0	0	0	2	0	0	0	1	0	1
157	BB2AT2_3913, alanyl-tRNA synthetase, 7640 - 10240	95 kDa	0	0	0	0	0	0	0	0	1	0	0	0	0	0	0	0	0	0	0	0	0	0	0	0	0	0	0	0	0	0	0	0	0	0	0	0	0	0	0	0	0	2	1	0	0	0	0
158	BB2AT2_2651, citrate synthase, chromosomal, 13898 - 14329	16 kDa	0	0	0	0	0	0	0	0	0	0	0	0	0	0	0	0	0	0	0	0	0	0	0	0	0	0	0	0	0	0	0	0	0	0	0	0	0	0	0	0	0	0	0	0	0	0	0
159	REVERSED - BB2AT2_2308, DNA-directed RNA polymerase, beta' subunit, 79626 - 83798	154 kDa	0	0	0	0	0	0	0	0	0	0	0	1	0	0	0	2	0	1	0	0	0	0	0	0	0	0	0	0	0	0	2	0	0	0	0	1	0	0	0	0	0	0	0	0	0	0	0
160	BB2AT2_3705, secretedprotein, 4364 - 5209	?	0	0	0	0	0	3	3	1	2	1	1	0	0	0	0	0	0	0	0	0	0	2	0	3	2	0	2	0	0	0	0	0	0	1	0	2	5	3	3	0	0	0	0	0	0	0	0
161	BB2AT2_3245, DNA gyrase, B subunit, 28631 - 31069	91 kDa	0	0	0	0	1	0	0	0	0	0	0	0	0	0	0	0	0	0	0	0	0	0	0	0	0	0	0	0	0	0	0	0	0	0	1	1	0	0	0	0	0	1	0	0	0	0	1
162	BB2AT2_1671, L-threonine 3-dehydrogenase, 95772 - 96797	37 kDa	0	0	0	0	0	0	0	0	0	0	0	0	0	1	0	0	0	0	0	0	0	0	0	0	0	0	0	0	0	0	0	0	0	0	0	0	0	0	0	0	0	0	0	0	0	0	0
163	BB2AT2_0835, porin, 88376 - 89545	42 kDa	0	0	4	6	2	0	0	0	1	0	0	0	0	0	0	0	0	0	1	4	1	1	0	0	0	0	0	0	0	0	0	0	0	2	3	1	0	0	0	0	0	0	0	0	0	0	0
164	BB2AT2_0207, TonB-dependent receptor, 14739 - 17591	104 kDa	0	0	2	8	5	0	0	0	0	0	1	0	0	0	0	0	0	0	0	8	2	0	0	0	0	0	0	0	0	0	0	0	0	0	4	0	0	0	0	0	0	0	0	0	0	0	0
165	BB2AT2_4191, sulfate adenylyltransferase subunit 1, 1324 - 2730	53 kDa	0	0	0	0	0	0	0	1	0	0	0	0	0	0	0	0	0	0	0	0	0	0	0	0	0	0	0	0	0	0	0	0	0	0	0	0	0	0	0	0	0	0	0	0	0	0	0
166	BB2AT2_1244, nucleoside diphosphate kinase, 152587 - 153018	16 kDa	0	0	0	0	0	0	0	0	0	0	0	0	0	0	0	0	0	0	0	0	0	0	0	0	0	0	0	0	0	0	0	0	0	0	0	0	0	0	0	0	0	1	0	0	0	0	0
167	BB2AT2_1358, cell division protein FtsY, 92136 - 93962	68 kDa	0	0	0	0	0	0	0	1	0	0	0	0	0	1	0	0	0	0	0	0	0	0	1	0	0	0	0	0	0	0	1	0	0	0	0	0	2	3	2	0	0	0	0	0	0	0	0
168	BB2AT2_3904, oxidoreductase, aldo/keto reductase, 229 - 1200	36 kDa	0	0	0	0	0	0	0	0	0	0	0	0	0	0	0	0	0	0	0	0	0	0	0	0	0	0	0	0	0	0	0	0	0	0	0	0	0	0	0	0	0	0	0	0	0	0	0
169	BB2AT2_2871, purine nucleoside phosphorylase, 1480 - 2181	25 kDa	0	0	0	0	0	0	0	0	0	0	0	0	0	0	0	0	0	0	0	0	0	0	0	0	0	0	0	0	0	0	1	0	0	0	0	0	0	0	0	0	0	0	0	0	0	0	0
170	BB2AT2_2310, ribosomal protein S7, 84464 - 84934	18 kDa	0	0	1	5	6	1	0	0	0	0	0	0	0	0	0	0	0	0	0	5	5	3	0	0	0	0	0	0	0	1	0	0	0	2	4	3	0	0	0	0	0	0	0	0	0	0	0
171	BB2AT2_0514, leucyl-tRNA synthetase, 127423 - 130011	98 kDa	1	0	0	0	0	0	0	0	0	0	0	0	0	0	0	0	0	0	0	0	0	0	0	0	0	0	0	0	0	0	0	0	0	0	0	0	0	0	0	0	0	0	0	0	0	0	0
172	BB2AT2_2009, alkalinephosphatase D, 89281 - 91059	?	0	0	0	1	2	0	0	2	0	0	0	0	0	0	0	0	0	0	0	1	2	0	0	0	0	0	0	0	0	0	0	0	0	0	0	0	0	0	0	0	0	0	0	0	0	0	0
173	BB2AT2_2283, S-adenosylmethionine decarboxylase proenzyme, 50482 - 51294	31 kDa	0	0	0	0	0	0	0	0	0	0	0	0	0	0	0	0	0	0	0	0	0	0	0	0	0	0	0	0	0	0	0	1	0	0	0	0	0	0	0	0	0	0	0	0	0	0	0
174	BB2AT2_1969, biofilm dispersion protein BdlA, 44502 - 47213	100 kDa	0	0	0	0	0	0	0	0	0	0	0	0	1	0	0	0	0	0	0	0	0	0	0	0	0	0	0	0	1	0	0	0	0	0	0	0	0	0	1	0	1	0	0	0	1	0	1
175	BB2AT2_1621, TonB-dependent Outer membrane receptor, 55971 - 57800	67 kDa	0	0	5	10	3	0	0	0	0	0	0	0	0	0	0	0	0	0	3	5	0	0	0	0	0	0	0	0	0	0	0	0	0	0	4	2	0	0	0	0	0	0	0	0	0	0	0
176	BB2AT2_2784, thioredoxin reductase, 59811 - 60287	17 kDa	0	0	0	0	0	0	0	0	0	0	0	0	0	0	0	0	0	0	0	0	0	0	0	0	0	0	0	0	0	0	0	0	0	0	0	0	0	0	0	0	0	0	0	0	0	0	0
177	BB2AT2_2171, valyl-tRNA synthetase, 26798 - 29650	108 kDa	0	0	0	0	0	0	0	0	0	0	0	0	0	1	0	0	0	0	0	0	0	0	0	0	0	0	0	0	0	0	0	0	0	0	0	0	0	0	0	0	0	0	1	0	1	1	0
178	BB2AT2_3701, conserved hypothetical protein, 1221 - 2540	49 kDa	0	0	7	5	3	1	1	1	1	0	0	0	0	0	0	0	0	0	3	5	3	0	1	0	0	0	0	0	0	0	0	0	0	4	6	0	0	0	0	0	0	0	0	0	0	0	0
179	BB2AT2_1134, catalase, 41373 - 42911	57 kDa	0	0	0	0	0	0	0	1	0	0	0	0	0	0	0	0	0	0	0	0	1	0	1	0	0	8	5	0	0	0	0	0	2	0	0	0	0	0	0	0	7	3	0	1	0	0	0
180	BB2AT2_3593, aspartyl-tRNA synthetase, 7007 - 8785	66 kDa	0	0	0	0	0	0	0	0	0	0	0	0	0	0	0	0	0	0	0	0	0	0	0	0	0	0	0	0	0	0	0	0	0	0	0	0	0	0	0	0	0	0	0	0	0	0	0
181	REVERSED - BB2AT2_1554, sensor protein, 124554 - 127010	92 kDa	0	0	0	0	0	0	0	0	0	0	0	0	0	0	0	0	0	0	0	0	0	0	0	0	0	0	0	0	0	0	0	0	0	0	0	0	0	0	0	0	0	0	0	0	0	0	0
182	BB2AT2_0153, RNA-binding S1 domain-containing protein, 172171 - 173001	31 kDa	0	0	0	0	0	0	0	0	0	0	0	0	0	0	0	0	0	0	0	0	0	0	0	0	0	0	0	0	0	0	0	0	0	0	0	0	0	0	0	0	0	0	0	0	1	1	0
183	BB2AT2_3574, glyceraldehyde-3-phosphate dehydrogenase, 35429 - 36871	53 kDa	0	0	0	0	2	0	0	0	0	0	0	0	0	0	0	0	0	0	0	1	3	0	0	0	0	0	0	0	0	0	0	0	0	0	3	3	0	0	0	0	0	0	0	0	0	0	0
184	BB2AT2_2599, dihydrodipicolinate reductase, 39115 - 39912	29 kDa	0	1	0	0	0	0	0	1	0	0	0	0	0	0	0	0	0	1	0	0	0	0	0	0	1	0	0	0	0	0	0	0	0	1	0	0	0	1	0	0	0	0	0	0	0	0	0
185	BB2AT2_3613, cysteinesynthase A, 28233 - 29201	?	0	0	0	0	0	0	0	0	0	0	0	0	0	0	0	0	0	0	0	0	0	0	0	0	0	0	0	0	0	0	0	0	0	0	0	0	0	0	0	0	0	0	0	0	0	0	0
186	BB2AT2_3577, phenylalanyl-tRNA synthetase, beta subunit, 38235 - 40622	87 kDa	0	0	0	0	0	0	0	0	0	0	0	0	0	0	1	1	0	0	0	0	0	0	0	0	0	0	2	0	0	0	0	0	0	0	0	0	0	0	0	0	7	4	4	1	0	0	0
187	BB2AT2_0785, GMP synthase, 38648 - 38890	9 kDa	0	0	0	0	0	0	0	0	0	0	0	0	0	0	0	0	0	0	0	0	0	0	0	0	0	0	0	0	0	0	0	0	0	0	0	1	0	0	0	0	0	0	0	0	0	0	0
188	BB2AT2_2311, translation elongation factor G, 84962 - 87076	77 kDa	0	0	0	0	0	0	0	0	0	0	0	0	0	0	0	0	0	0	0	0	0	0	0	0	0	0	0	0	0	1	0	0	0	0	0	0	0	0	0	0	0	0	0	0	0	0	0
189	BB2AT2_0304, histidinol-phosphate transaminase, 119277 - 120386	40 kDa	0	0	0	0	0	0	0	0	0	0	0	0	0	0	0	0	0	0	0	0	0	0	0	0	0	0	0	0	0	0	0	0	0	0	0	1	0	0	1	0	0	0	0	0	0	0	0
190	BB2AT2_3940, putativeorphan protein, 13611 - 14393	?	0	0	4	7	6	0	0	0	0	0	0	0	0	0	0	0	0	0	1	5	2	0	0	0	0	0	0	0	0	0	0	0	0	0	3	1	0	0	0	0	0	0	0	0	0	0	0
191	BB2AT2_2155, ribosomal protein S18, 15456 - 15683	9 kDa	0	0	0	3	7	1	0	0	0	0	0	0	0	0	0	0	0	0	0	3	6	1	0	0	0	0	0	0	0	0	0	0	0	1	3	3	1	0	0	0	0	0	0	0	0	0	0
192	BB2AT2_2490, ATP-dependent protease La, 4081 - 6441	88 kDa	0	0	0	0	0	0	0	0	0	0	0	0	0	0	0	0	0	0	0	0	0	0	0	0	0	0	0	0	0	0	0	0	0	0	0	0	0	0	0	0	0	0	0	0	0	0	0
193	BB2AT2_3955, glucose-1-phosphate thymidylyltransferase, 7921 - 8832	34 kDa	0	0	0	0	0	0	0	0	0	0	0	3	1	0	0	0	0	0	0	0	0	0	0	0	0	0	0	1	0	0	0	0	0	0	0	0	0	0	0	0	0	0	0	0	0	0	0
194	BB2AT2_4069, protein YicC, 2415 - 3275	33 kDa	0	0	0	0	0	0	0	0	0	0	0	0	0	0	0	0	1	0	0	0	0	0	0	0	0	0	0	0	0	0	0	0	0	0	0	0	0	0	0	0	0	0	0	0	0	0	0
195	BB2AT2_1368, 2,3-bisphosphoglycerate-independent phosphoglycerate mutase, 100885 - 102429	56 kDa	0	0	0	0	0	0	0	0	0	0	0	0	0	0	0	0	0	0	0	0	0	0	0	0	0	0	0	0	0	0	0	0	0	0	0	0	0	0	0	0	0	0	0	0	0	0	0
196	BB2AT2_4087, phosphodiesterase I, 7909 - 9132	45 kDa	0	0	1	3	1	0	0	0	0	0	0	0	0	1	0	0	0	0	0	2	1	0	0	0	0	0	0	0	0	0	0	0	0	2	9	9	3	1	0	0	0	0	0	0	0	0	0
197	BB2AT2_2596, transcription elongation factor GreA, 33856 - 34332	18 kDa	0	0	0	0	0	0	0	0	0	0	0	0	0	0	0	0	0	0	0	0	0	0	0	0	0	0	0	0	0	0	0	0	0	0	0	0	0	0	0	0	0	0	0	0	0	0	0
198	BB2AT2_3823, branched-chain amino acid aminotransferase, 8144 - 9139	36 kDa	0	0	0	0	0	0	0	0	0	0	0	0	0	0	0	0	0	0	0	0	0	0	0	0	0	1	5	2	0	0	0	0	0	0	0	0	0	0	2	4	2	6	1	0	0	0	0
199	BB2AT2_3988, tyrosyl-tRNA synthetase, 1729 - 2928	44 kDa	0	0	0	0	0	0	0	0	0	0	0	0	0	2	0	0	0	0	0	0	0	0	0	0	0	0	0	0	0	0	0	0	0	0	0	0	0	0	0	0	0	0	0	0	0	0	0
200	BB2AT2_1565, succinylglutamate desuccinylase, 138350 - 139402	39 kDa	0	0	0	0	0	0	0	0	0	0	0	0	0	0	0	0	0	0	0	0	0	0	0	0	0	0	0	0	0	0	0	0	0	0	0	0	0	0	0	0	11	4	0	0	0	0	0
201	BB2AT2_3096, sulfite reductase (NADPH) hemoprotein, beta-component, 20475 - 22172	63 kDa	0	0	0	0	0	0	0	0	0	1	0	0	0	0	0	0	0	0	0	0	0	0	0	0	0	0	0	0	0	0	1	0	0	0	0	0	0	0	0	1	0	0	0	0	0	0	0
202	BB2AT2_2447, peptidase S8 and S53, subtilisin, kexin, sedolisin, 52322 - 56029	129 kDa	0	0	0	0	0	0	0	0	0	0	0	0	0	0	0	0	0	0	0	0	0	0	0	0	0	0	0	0	0	0	0	0	0	0	0	0	0	0	0	0	0	0	0	0	0	0	0
203	BB2AT2_2872, phosphopentomutase, 2198 - 3415	44 kDa	0	0	0	0	0	0	0	0	0	0	0	0	0	0	0	0	0	0	0	0	0	0	0	0	0	0	0	0	0	0	0	0	0	0	0	0	1	0	0	0	0	0	0	0	0	0	0
204	BB2AT2_2189, thermostable carboxypeptidase 2, 46042 - 47331	46 kDa	0	0	0	0	0	0	0	0	0	0	0	0	0	0	0	0	0	0	0	0	0	0	0	5	4	0	0	0	1	0	0	0	0	0	0	0	2	3	34	3	1	2	2	0	0	0	0
205	BB2AT2_0398, ATP-dependent chaperone protein ClpB, 16777 - 19353	96 kDa	0	0	0	1	0	0	0	0	0	0	0	0	0	0	0	0	0	0	0	1	0	0	0	0	0	1	1	1	0	0	0	0	0	0	0	0	0	0	0	0	1	8	5	0	0	0	0
206	BB2AT2_2401, 3-octaprenyl-4-hydroxybenzoate carboxy-lyase, 6156 - 7622	55 kDa	0	0	0	0	0	0	0	0	0	0	0	0	0	0	0	0	0	0	0	0	0	0	0	0	0	0	0	0	0	0	0	0	0	0	0	0	0	0	0	0	0	0	0	0	1	0	0
207	BB2AT2_3758, thioredoxin domain-containing protein, 417 - 1274	31 kDa	0	0	0	0	0	0	0	0	0	0	0	0	0	0	0	0	0	0	0	0	0	0	0	0	0	0	0	0	0	0	0	0	0	0	0	0	0	0	0	0	0	0	0	0	0	0	0
208	BB2AT2_2958, ATP-dependent protease HslVU, ATPase subunit, 5575 - 6903	50 kDa	0	0	0	0	0	1	0	0	0	0	0	0	0	0	1	0	0	0	0	0	0	0	0	0	0	0	0	0	0	0	0	0	0	0	0	0	1	0	0	0	0	0	0	0	0	0	0
209	BB2AT2_4064, tRNA pseudouridine synthase A, 12427 - 13221	30 kDa	0	0	0	0	0	0	0	0	0	0	0	0	0	0	0	0	0	0	0	0	0	0	0	0	0	0	0	0	0	0	0	0	0	1	3	4	5	4	3	0	0	0	0	0	0	0	0
210	BB2AT2_0632, arginasefamily protein, 71652 - 72761	?	0	0	0	0	0	0	0	0	0	0	0	0	0	0	0	0	0	0	0	0	0	0	0	0	0	0	0	0	0	0	0	0	0	0	0	0	0	0	0	0	0	0	0	0	0	0	0
211	BB2AT2_3282, nitrogenregulatory protein P-II, 8282 - 8626	?	0	0	0	0	0	0	0	0	0	0	0	0	0	0	0	0	0	0	0	0	0	0	0	0	0	0	0	0	0	0	0	0	0	0	0	0	0	0	0	0	0	0	0	0	0	0	0
212	BB2AT2_1843, biofilm dispersion protein BdlA, 40950 - 42251	48 kDa	0	0	0	0	0	0	0	0	0	0	0	0	0	0	0	0	0	0	0	0	0	0	0	0	0	0	1	2	1	0	0	0	0	0	0	0	0	0	1	2	1	2	2	1	0	0	0
213	BB2AT2_1048, peptidylprolyl isomerase PrsA3, 130970 - 131251	10 kDa	0	0	0	0	0	0	0	0	0	0	0	0	0	0	0	0	0	0	0	0	0	0	0	0	0	0	0	0	0	0	0	0	0	0	0	0	0	0	0	0	0	0	0	0	0	0	0
214	BB2AT2_2396, plasma glutamate carboxypeptidase, 114 - 1514	50 kDa	0	0	0	2	2	1	0	0	0	0	0	0	0	0	0	0	0	0	2	8	6	3	0	1	1	1	1	0	0	0	0	0	0	0	3	5	0	1	0	0	0	0	0	0	0	0	0
215	BB2AT2_3367, periplasmic calcium binding protein, 31252 - 33981	97 kDa	0	0	0	0	0	1	0	0	0	0	0	0	0	0	0	0	0	0	0	0	0	0	0	0	0	0	0	0	0	0	0	0	0	0	0	0	0	0	0	0	0	0	0	0	0	0	0
216	BB2AT2_3329, 4-hydroxyphenylpyruvate dioxygenase, 55832 - 56641	31 kDa	0	0	0	0	0	0	0	0	0	0	0	0	0	0	0	0	0	0	0	0	0	0	0	0	0	0	0	0	0	0	0	0	0	0	0	0	0	0	0	0	0	0	0	0	0	0	0
217	BB2AT2_2717, transcriptional regulatory protein PhoP, 1759 - 2433	26 kDa	0	0	0	0	0	0	0	0	0	0	0	0	0	0	0	0	0	0	0	0	0	0	0	0	0	0	0	3	1	0	0	0	0	0	0	0	0	0	0	0	0	0	2	1	1	0	0
218	BB2AT2_0112, threonyl-tRNA synthetase, 127861 - 129771	73 kDa	0	0	0	0	0	0	0	0	0	0	0	0	0	0	0	0	0	0	0	0	0	0	0	0	0	0	0	0	0	0	0	0	0	0	0	0	0	0	0	0	0	0	1	1	0	0	0
219	BB2AT2_3484, ribosomal protein S9, 40716 - 41105	15 kDa	0	0	0	0	1	1	0	0	0	0	0	0	0	0	0	0	0	0	0	1	1	1	0	0	0	0	0	0	0	0	0	0	0	0	5	4	3	1	0	0	0	0	0	0	0	0	0
220	BB2AT2_0239, acetylornithine aminotransferase, 47958 - 49163	43 kDa	0	1	0	0	0	0	0	0	0	0	0	0	0	0	0	0	0	0	0	0	0	0	0	0	0	0	0	0	0	0	0	0	0	0	0	0	0	0	0	0	0	0	2	1	0	0	0
221	BB2AT2_2524, acyl-(acyl-carrier-protein)-UDP-N- acetylglucosamine O-acyltransferase, 41605 - 42399	28 kDa	0	0	0	0	0	0	0	0	0	0	0	0	0	0	0	0	0	0	0	0	1	0	0	0	0	0	0	0	0	0	0	0	0	0	2	9	5	5	8	4	1	0	0	0	0	0	0
222	BB2AT2_2222, responseregulator Rcp1, 73322 - 73783	?	0	0	0	0	0	0	0	0	0	0	0	0	0	0	0	0	0	0	0	0	0	0	0	0	0	0	0	0	0	0	0	0	0	0	0	0	0	0	0	0	0	0	0	0	0	0	0
223	BB2AT2_0924, hypoxanthine-guanine phosphoribosyltransferase, 113 - 679	21 kDa	0	0	0	0	0	0	0	0	0	0	0	0	0	0	0	0	0	0	0	0	0	0	0	0	0	0	0	0	0	0	0	0	0	0	0	0	0	0	0	0	0	0	0	0	0	0	0
224	BB2AT2_4007, translation elongation factor P, 1711 - 2277	20 kDa	0	0	0	0	0	0	0	0	0	0	0	0	0	0	1	0	0	0	0	0	0	0	0	0	0	0	0	0	0	0	1	0	0	0	0	0	0	0	0	0	0	0	0	0	0	0	0
225	BB2AT2_2317, TPR repeat-containing protein, 2990 - 4249	48 kDa	0	0	0	0	1	0	0	0	0	0	0	0	0	1	0	0	0	0	0	2	2	1	0	0	0	0	0	0	0	0	0	0	0	1	3	5	3	1	0	1	0	0	0	2	0	0	0
226	BB2AT2_0910, hybrid peroxiredoxin hyPrx5, 165459 - 166187	27 kDa	0	0	0	0	0	0	0	0	0	0	0	0	0	0	0	0	0	0	0	0	0	0	0	0	0	0	0	0	0	0	0	0	0	0	0	0	0	0	0	0	0	0	0	0	0	0	0
227	BB2AT2_2363, glucose-6-phosphate dehydrogenase, 53869 - 55341	56 kDa	0	0	0	1	0	0	0	0	0	0	0	0	0	0	0	0	0	0	0	0	0	0	0	0	1	0	0	0	0	0	0	0	0	0	0	0	0	0	0	0	0	0	0	0	1	0	0
228	BB2AT2_3209, lysyl-tRNA synthetase, 58208 - 59743	59 kDa	0	0	0	0	0	0	0	0	0	1	0	0	0	0	1	0	0	0	0	0	0	0	0	0	0	0	0	0	0	0	0	0	0	0	1	1	0	0	0	0	0	0	0	0	0	0	0
229	BB2AT2_3950, polysialic acid transport protein KpsD, 3206 - 4936	63 kDa	0	0	2	6	1	0	0	0	0	0	0	1	0	0	0	0	0	0	1	4	2	0	0	0	0	0	0	0	0	0	0	0	0	0	4	1	0	0	0	0	0	0	0	0	0	0	0
230	BB2AT2_3780, serine hydroxymethyltransferase, 22023 - 23279	45 kDa	0	0	0	0	0	0	0	0	0	0	0	0	0	0	0	0	0	0	0	0	0	0	0	0	0	0	0	0	0	0	0	0	0	0	0	0	0	0	0	0	1	0	0	0	0	0	0
231	BB2AT2_2885, acylaminoacyl-peptidase, 11156 - 13192	75 kDa	0	0	0	0	0	0	0	0	0	0	0	0	0	0	0	0	0	0	0	1	0	0	0	0	0	0	0	0	0	0	0	0	0	1	0	0	0	0	0	0	0	0	0	0	0	0	0
232	BB2AT2_2699, cupin superfamily protein, 63768 - 64913	44 kDa	0	0	0	0	0	0	0	0	0	0	0	0	0	0	0	0	0	0	0	0	0	0	0	0	0	0	0	0	0	0	0	0	0	0	0	0	0	0	0	0	0	0	0	0	0	0	1
233	BB2AT2_0867, fkbp-type peptidyl-prolyl cis-trans isomerase ilpa, 123614 - 124099	18 kDa	0	0	0	0	0	0	0	0	0	0	0	0	0	0	0	0	0	0	0	0	0	0	0	0	0	0	0	0	0	0	0	0	0	0	0	0	0	0	0	0	0	0	0	0	0	0	0
234	BB2AT2_1707, 12-oxophytodienoate reductase 1, 13071 - 14114	38 kDa	0	0	0	0	0	0	1	0	0	0	0	0	0	0	0	0	0	0	0	0	0	0	0	0	0	0	0	0	0	0	0	0	0	0	0	0	0	0	0	0	0	0	0	0	0	0	0
235	BB2AT2_4067, orotate phosphoribosyltransferase, 881 - 1525	23 kDa	0	0	0	0	0	0	0	0	0	0	0	0	0	0	0	0	0	0	0	0	0	0	0	0	0	0	0	0	0	0	0	0	0	0	0	0	0	0	0	0	0	0	0	0	0	0	0
236	BB2AT2_2619, putativeglutaredoxin family protein, 59964 - 60302	?	0	0	0	0	0	0	0	0	0	0	0	0	0	0	0	0	0	0	0	0	0	0	0	0	0	0	0	0	0	0	0	0	0	0	0	0	0	0	0	0	0	0	0	0	0	0	0
237	BB2AT2_4054, peptidyl-prolyl cis-trans isomerase B, 3382 - 3873	18 kDa	0	0	0	0	0	0	0	0	0	0	0	0	0	0	0	0	0	0	0	0	0	0	0	0	0	0	0	0	0	0	0	0	0	0	0	0	0	0	0	0	0	0	0	0	0	0	0
238	BB2AT2_0450, ATP-dependent RNA helicase DeaD, 71616 - 73418	67 kDa	0	0	0	0	0	0	0	0	0	0	0	0	0	1	0	0	0	0	0	0	1	0	0	0	0	0	1	0	0	0	0	0	0	0	0	1	2	0	0	0	0	0	0	0	1	1	0
239	BB2AT2_0783, GMP synthase, N- domain, 37821 - 38537	26 kDa	0	0	0	0	0	0	0	0	0	0	0	0	0	0	0	0	0	0	0	0	0	0	0	0	0	0	0	1	0	0	0	0	0	0	0	0	0	0	0	0	0	0	0	0	0	0	0
240	BB2AT2_2328, protein YbgI, 15289 - 16041	27 kDa	0	0	0	0	0	0	0	0	0	0	0	0	0	0	0	0	0	0	0	0	0	0	0	0	0	0	0	0	0	0	0	0	0	0	0	0	0	21	14	0	0	0	0	0	0	0	0
241	BB2AT2_1320, queuine tRNA-ribosyltransferase, 55048 - 56172	42 kDa	0	0	0	0	0	0	0	0	0	0	0	1	0	0	0	0	0	0	0	0	0	0	0	0	0	0	0	1	0	0	0	0	0	0	0	0	0	0	0	0	0	0	0	0	0	0	0
242	BB2AT2_2058, excinuclease ABC subunit A, 19161 - 21980	104 kDa	1	0	0	0	0	0	1	0	0	0	1	0	0	0	0	0	0	0	0	0	0	0	0	0	0	0	0	0	0	0	0	0	0	0	0	1	0	0	0	0	0	0	0	0	0	0	0
243	BB2AT2_1868, glycerophosphoryl diester phosphodiesterase, 64555 - 65886	48 kDa	0	0	0	0	0	0	0	0	0	0	0	0	0	0	0	0	0	0	0	0	0	0	0	0	0	0	0	0	0	0	0	0	0	0	0	0	0	0	2	0	0	0	1	2	0	0	0
244	BB2AT2_2433, protein YcaO, 36591 - 38351	67 kDa	0	0	0	0	0	0	0	0	0	0	0	0	0	0	0	0	0	0	0	1	0	0	0	0	0	0	0	0	0	0	0	0	0	0	0	0	0	0	0	0	0	0	0	0	0	0	0
245	BB2AT2_0744, amidohydrolase 3, 2249 - 3904	61 kDa	0	0	0	0	0	0	0	0	0	0	0	0	0	0	0	0	0	0	0	0	0	0	0	0	0	0	10	31	2	0	0	0	0	0	0	0	0	0	0	0	0	0	1	0	0	0	0
246	BB2AT2_0076, 2-dehydro-3-deoxy-phosphogluconate aldolase, 90511 - 91131	22 kDa	0	0	0	0	0	0	0	0	0	0	0	0	0	0	0	0	0	0	0	0	0	0	0	0	0	0	0	0	0	0	0	0	0	0	0	0	0	0	0	0	0	0	0	0	0	0	0
247	BB2AT2_3243, glycyl-tRNA synthetase, beta subunit, 25516 - 27585	76 kDa	0	0	0	0	0	0	0	0	0	0	0	0	0	0	0	0	0	0	0	0	0	0	0	0	0	0	0	0	0	0	0	0	0	0	0	0	0	0	0	0	0	0	0	0	0	0	0
248	BB2AT2_1110, dihydrodipicolinate synthetase, 12814 - 13782	35 kDa	0	0	0	0	0	0	0	0	0	0	0	0	0	0	0	0	0	0	0	0	0	0	0	0	0	0	0	0	0	0	0	0	0	0	0	0	0	1	1	9	5	10	1	0	0	0	0
249	BB2AT2_3193, conserved hypothetical protein, 42893 - 43672	29 kDa	0	0	0	0	0	0	0	0	0	0	0	0	0	0	0	0	0	0	0	0	4	2	1	1	0	0	0	0	0	0	0	0	0	0	5	10	8	5	4	0	0	0	0	0	0	0	0
250	BB2AT2_1537, putativeorphan protein, 107254 - 108066	?	0	0	0	0	0	0	0	0	0	0	0	1	0	0	0	0	0	0	0	0	0	0	0	0	0	0	0	0	0	0	0	0	0	0	0	0	0	0	0	0	0	0	8	4	1	0	0
251	BB2AT2_1347, phosphoribosylamine--glycine ligase, 79930 - 81213	46 kDa	0	0	0	0	0	0	0	0	0	0	0	0	0	0	0	0	0	0	0	0	0	0	0	0	0	0	0	0	0	0	0	0	0	0	0	0	0	0	0	0	0	0	0	0	0	0	0
252	BB2AT2_3105, ribosomal protein L16, 28620 - 29033	16 kDa	0	0	2	2	2	1	0	0	0	0	0	0	0	0	0	0	0	0	0	2	2	1	0	0	0	0	0	0	0	0	0	0	0	1	2	2	1	0	0	0	0	0	0	0	0	0	0
253	BB2AT2_2321, MotA/TolQ/ExbB proton channel protein, 5818 - 7182	49 kDa	0	0	4	1	1	0	0	0	0	0	0	0	0	0	0	0	0	0	2	2	0	0	0	0	0	0	0	0	0	0	0	0	0	1	1	2	0	0	0	0	0	0	0	0	0	0	0
254	BB2AT2_2279, arginineN-succinyltransferase, beta subunit, 47329 - 47856	?	0	0	0	0	0	0	0	0	0	0	0	0	0	0	0	0	0	0	0	0	0	0	0	0	0	0	0	0	0	0	0	0	0	0	0	0	0	0	0	0	0	0	0	0	0	0	0
255	BB2AT2_3959, glycosyltransferase, group 1, 12295 - 16041	?	1	0	0	0	0	0	0	0	0	0	0	0	0	0	0	0	0	0	0	0	0	0	0	0	0	0	0	0	0	0	0	0	0	0	0	0	0	0	0	0	0	0	0	0	0	0	0
256	BB2AT2_2774, enzyme, 48794 - 50176	50 kDa	0	0	1	0	2	0	0	0	0	0	0	0	0	0	0	0	0	0	1	0	1	1	0	0	0	0	0	0	1	0	0	0	0	1	1	1	0	0	0	0	0	0	0	0	0	0	0
257	BB2AT2_1248, 4-hydroxy-3-methylbut-2-en-1-yl diphosphate synthase, 157254 - 158372	40 kDa	0	0	0	0	0	0	0	0	0	0	0	0	0	0	0	0	0	0	0	0	0	0	0	0	0	0	0	0	0	0	0	0	0	0	0	1	0	0	0	0	0	0	0	0	0	0	0
258	BB2AT2_1282, mandelate racemase, 17377 - 18552	44 kDa	0	0	0	0	0	0	0	0	0	0	0	0	0	0	0	0	0	0	0	0	0	0	0	0	0	0	0	0	0	0	0	0	0	0	0	0	0	0	0	0	0	0	0	0	0	0	0
259	BB2AT2_3778, riboflavin biosynthesis protein RibD, 20334 - 21467	41 kDa	0	0	0	0	0	0	0	0	0	0	0	0	0	0	0	0	0	0	0	0	0	2	4	5	6	2	0	0	0	0	0	0	0	0	0	0	0	0	0	0	0	0	0	0	0	0	0
260	BB2AT2_2039, ribosomal protein L17, 110551 - 110952	15 kDa	0	0	1	3	5	2	0	0	0	0	0	0	0	0	0	0	0	0	0	3	4	3	1	0	0	0	0	0	0	0	0	0	0	0	2	3	1	0	0	0	0	0	0	0	0	0	0
261	BB2AT2_1117, peptidase M24, 19801 - 20718	34 kDa	0	0	0	0	0	0	0	0	0	0	0	0	0	0	0	0	0	0	0	0	0	0	0	0	0	0	0	0	0	0	0	0	0	0	0	0	0	0	9	5	2	0	0	0	0	0	0
262	BB2AT2_0668, bacterioferritin, 107438 - 107911	18 kDa	0	0	0	0	0	0	0	0	0	0	0	0	0	0	0	0	0	0	1	0	0	0	0	0	0	0	0	0	0	0	0	0	0	0	0	0	0	0	0	0	0	0	0	0	0	0	0
263	BB2AT2_3863, hydroxyacylglutathione hydrolase, 22629 - 23402	29 kDa	0	0	0	0	0	0	0	0	0	0	2	1	0	0	0	0	0	0	0	0	0	0	0	0	0	0	27	13	4	0	0	0	0	0	0	0	0	0	0	0	0	2	0	0	0	0	0
264	BB2AT2_2783, thioredoxin reductase, 59338 - 59685	12 kDa	0	0	0	0	0	0	0	0	0	0	0	0	0	0	0	0	0	0	0	0	0	0	0	0	0	0	0	0	0	0	0	0	0	0	0	0	0	0	0	0	0	0	0	0	0	0	0
265	BB2AT2_0938, fructose-bisphosphate aldolase, class II, Calvin cycle subtype, 12746 - 13810	38 kDa	0	0	0	0	0	0	0	0	0	0	0	0	0	0	0	0	0	0	0	0	0	0	0	0	0	0	0	0	0	0	0	0	0	0	0	0	0	0	0	0	0	0	0	0	0	0	0
266	BB2AT2_2364, glucose-6-phosphate isomerase, 55610 - 57256	61 kDa	0	0	0	0	0	0	0	0	0	0	0	0	0	0	0	0	0	0	0	0	0	0	0	0	0	0	0	0	0	0	0	0	0	0	0	0	0	0	0	0	0	0	0	0	0	0	0
267	BB2AT2_3776, 3,4-dihydroxy-2-butanone 4-phosphate synthase, 18523 - 19635	40 kDa	0	0	0	0	0	0	0	0	0	0	0	0	0	0	0	0	0	0	0	0	0	0	0	0	0	0	0	0	0	0	0	0	0	0	0	0	0	0	0	0	0	0	2	0	0	0	0
268	BB2AT2_3775, 6,7-dimethyl-8-ribityllumazine synthase, 17957 - 18421	16 kDa	0	0	0	0	0	0	0	0	0	0	0	0	0	0	0	0	0	0	0	0	0	0	0	0	0	0	0	0	0	0	0	0	0	0	0	0	0	0	0	0	0	0	0	0	0	0	0
269	BB2AT2_3449, phosphoribosylaminoimidazole-succinocarboxamide synthase, 10080 - 11183	41 kDa	0	0	0	0	0	0	0	0	0	0	0	0	0	0	0	0	0	0	0	0	0	0	0	0	0	0	0	0	0	0	0	0	0	0	0	0	0	0	0	0	0	0	0	0	0	0	0
270	BB2AT2_1419, N-acylglucosamine 2-epimerase, 153835 - 155034	47 kDa	0	0	0	0	0	0	0	0	0	0	0	0	0	0	0	0	0	0	0	0	0	0	0	0	0	0	0	0	0	0	0	0	0	0	0	0	0	0	0	0	4	0	0	0	0	0	0
271	BB2AT2_3483, ribosomal protein L13, 40276 - 40704	16 kDa	0	0	0	4	7	0	0	0	0	0	0	0	0	0	0	0	0	0	0	1	1	0	0	0	0	0	0	0	0	0	0	0	0	0	1	0	0	0	0	0	0	0	0	1	0	0	0
272	BB2AT2_3609, conserved hypothetical protein, 22401 - 23195	30 kDa	0	0	0	4	3	0	0	0	0	0	0	0	0	0	0	0	0	0	0	4	1	0	0	0	0	0	0	0	0	0	0	0	0	0	6	0	0	0	1	0	0	0	0	0	0	0	0
273	BB2AT2_2855, purine-binding chemotaxis protein, 59000 - 59497	18 kDa	0	0	0	0	0	0	0	0	0	0	0	0	0	0	0	0	0	0	0	0	0	0	0	0	0	0	0	0	0	0	0	0	0	0	0	0	0	0	0	0	0	0	0	0	0	0	0
274	BB2AT2_0469, transcription elongation protein NusA, 87396 - 88763	51 kDa	0	0	0	0	0	0	0	0	0	0	0	0	0	0	0	0	0	0	0	0	0	0	0	0	0	0	0	0	0	0	1	0	0	0	0	0	0	0	0	0	0	0	0	0	0	0	0
275	BB2AT2_0350, aspartate-semialdehyde dehydrogenase, 166270 - 167409	41 kDa	0	0	0	0	0	0	0	0	0	0	0	0	0	0	0	0	0	0	0	0	0	0	0	0	0	0	0	0	0	0	0	0	0	0	0	0	0	0	0	0	0	0	1	0	0	0	0
276	BB2AT2_1597, TonB-dependent receptor, plug, 22439 - 25387	107 kDa	0	0	3	3	3	0	0	0	0	0	0	0	1	0	0	0	0	0	1	4	1	0	0	0	0	0	0	0	0	0	0	0	0	1	4	0	0	0	0	0	0	0	0	0	0	0	0
277	BB2AT2_3733, prostaglandin reductase 1, 4539 - 5567	37 kDa	0	0	0	0	0	0	0	0	0	0	0	0	0	0	0	0	0	0	0	0	0	0	0	0	0	0	0	0	0	0	0	0	0	0	0	0	0	0	0	0	0	0	0	0	0	0	0
278	BB2AT2_2303, ribosomal protein L1, 73264 - 73968	25 kDa	0	0	0	0	0	0	0	0	0	0	0	0	0	0	0	0	0	0	0	0	0	0	0	0	0	0	0	0	0	0	0	0	0	0	0	0	0	0	0	0	0	0	2	4	2	1	0
279	BB2AT2_4190, sulfate adenylyltransferase subunit 2 1, 349 - 1257	35 kDa	0	0	0	0	0	0	0	0	0	0	0	0	0	0	0	0	0	0	0	0	0	0	0	0	0	0	0	0	0	0	0	0	0	0	0	0	0	0	0	0	0	0	0	0	0	0	0
280	BB2AT2_3271, alkalinephosphatase, 56470 - 58263	?	0	0	0	0	0	0	0	0	0	0	4	4	0	0	0	0	0	0	0	0	0	0	0	0	0	0	3	3	0	0	0	0	0	0	0	0	7	4	1	0	0	0	0	0	0	0	0
281	BB2AT2_1979, zinc-dependent carboxypeptidase domain-containing protein, 53166 - 55700	94 kDa	0	0	0	0	0	0	0	0	0	0	0	0	0	0	0	0	1	0	0	0	0	1	0	0	0	0	0	0	0	0	0	0	0	0	5	3	0	0	0	0	0	0	0	0	0	0	0
282	BB2AT2_1586, peptidylprolyl isomerase, 12107 - 12724	23 kDa	0	0	0	0	0	0	0	0	0	0	0	0	0	0	0	0	0	0	0	0	0	0	0	0	0	0	0	0	0	0	0	0	0	0	0	0	0	0	0	0	0	0	0	0	0	0	0
283	BB2AT2_1571, flavodoxin, 143428 - 143955	20 kDa	0	0	0	0	0	0	0	0	0	0	0	0	0	0	0	0	0	0	0	0	0	0	0	1	0	0	0	0	0	0	0	0	0	0	0	0	0	0	0	0	0	0	0	0	0	0	0
284	BB2AT2_3569, conserved hypothetical protein, 28935 - 31616	102 kDa	0	0	0	0	0	0	0	0	0	0	0	0	0	0	0	0	0	0	0	0	0	0	0	0	0	0	0	2	0	0	0	0	0	0	0	1	1	1	0	0	2	3	5	2	0	0	0
285	BB2AT2_0669, bacterioferritin, 107924 - 108388	19 kDa	0	0	0	0	0	0	0	0	0	0	0	0	0	0	0	0	0	0	0	0	0	0	0	0	0	0	0	0	0	0	0	0	0	0	0	0	0	0	0	0	0	0	0	0	0	0	0
286	BB2AT2_2282, protein YhfA, 49980 - 50393	15 kDa	0	0	0	0	0	0	0	0	0	0	0	0	0	0	0	0	0	0	0	0	0	0	0	0	0	2	3	1	0	0	0	0	0	0	0	0	0	0	0	0	14	13	7	2	0	0	0
287	BB2AT2_3233, Xaa-Pro dipeptidase, 16619 - 17941	51 kDa	0	0	0	0	0	0	0	0	0	0	0	0	0	0	0	0	0	0	0	0	0	0	0	0	0	0	0	0	0	0	0	0	0	0	0	0	0	0	0	0	0	0	0	0	0	0	0
288	BB2AT2_2412, iron donor protein CyaY, 18468 - 18791	12 kDa	0	0	0	0	0	0	0	0	0	0	0	0	0	0	0	0	0	0	0	0	0	0	0	0	0	0	0	0	0	0	0	0	0	0	0	0	0	0	0	0	0	0	0	0	0	0	0
289	BB2AT2_1763, malonyl CoA-acyl carrier protein transacylase, 76103 - 77029	32 kDa	0	0	0	1	0	0	0	0	0	0	0	0	0	0	0	0	0	0	0	0	0	0	0	0	0	0	0	0	0	0	0	0	0	0	0	0	0	0	0	0	0	0	0	1	0	0	0
290	BB2AT2_1030, glycine cleavage system T protein, 114061 - 115143	39 kDa	0	0	0	0	0	0	0	0	0	1	0	0	0	0	0	0	1	0	1	0	0	0	0	0	0	0	1	0	0	0	0	0	0	0	0	0	0	0	0	0	0	0	0	0	0	0	0
291	BB2AT2_0139, ribonucleoside-diphosphate reductase, alpha subunit, 156895 - 159177	86 kDa	0	0	0	0	0	0	0	0	0	0	0	0	0	0	0	0	0	0	0	0	0	0	0	0	0	0	0	0	0	0	0	0	0	0	0	0	0	0	0	0	0	0	0	0	0	0	0
292	BB2AT2_0834, outer membrane receptor for ferric iron uptake; TonB-dependent receptor, 85788 - 87914	78 kDa	0	0	3	4	3	0	0	0	0	0	0	0	0	0	0	0	0	0	0	3	1	0	0	0	0	0	0	0	0	0	0	0	0	1	3	1	0	0	0	0	0	0	0	0	0	0	0
293	BB2AT2_3939, polysaccharide export protein, 10811 - 13489	99 kDa	0	0	2	6	1	0	0	0	0	0	0	0	0	0	0	0	0	0	1	6	1	0	0	0	0	0	0	0	0	0	0	0	0	0	2	0	0	0	0	0	0	0	0	0	0	0	0
294	BB2AT2_3152, outer membrane protein TolC, 9336 - 10691	49 kDa	0	0	1	6	1	0	0	0	0	0	0	0	0	0	0	0	0	0	1	2	3	0	0	0	0	0	0	0	0	0	0	1	0	0	3	0	0	0	0	0	0	0	0	0	0	0	0
295	BB2AT2_0004, probableAcnD-accessory protein PrpF, 4922 - 6088	?	0	0	0	0	0	0	0	0	0	0	0	0	0	0	0	0	1	0	0	0	0	0	0	0	0	0	0	0	0	0	0	0	0	0	0	0	0	0	9	3	0	0	0	0	0	0	0
296	BB2AT2_0882, pyridoxine 5'-phosphate synthase, 135576 - 136307	27 kDa	0	0	0	0	0	0	0	0	0	0	0	0	0	0	0	0	0	0	0	0	0	0	0	0	0	0	0	0	0	0	0	0	0	0	0	0	0	0	0	0	0	0	0	0	0	0	0
297	BB2AT2_0408, ribosomal protein L19, 29343 - 29702	13 kDa	0	0	1	1	3	2	0	0	0	0	0	0	0	0	0	0	0	0	0	1	2	2	0	0	0	0	0	0	0	0	0	0	0	1	1	1	2	1	1	0	0	0	0	0	0	0	0
298	BB2AT2_3108, ribosomal protein L2, 30401 - 31225	30 kDa	0	0	0	0	0	0	0	0	0	0	0	0	0	0	0	0	0	0	0	1	0	0	0	0	0	0	0	0	0	0	0	0	0	0	1	1	1	0	0	0	0	0	0	0	0	0	0
299	BB2AT2_3528, DNA ligase, NAD-dependent, 38814 - 40832	74 kDa	0	0	0	0	0	0	0	0	0	0	0	0	0	0	0	0	0	0	0	0	0	0	0	0	0	0	0	0	0	0	0	0	0	0	0	0	0	0	0	0	1	4	1	0	0	0	0
300	BB2AT2_1687, phosphoribosylformylglycinamidine synthase, 111806 - 115696	141 kDa	0	0	0	0	0	0	0	0	0	0	0	0	0	0	0	0	0	0	0	0	0	0	0	0	0	0	0	0	0	0	0	0	0	0	0	0	0	0	0	0	0	0	0	0	0	0	0
301	BB2AT2_0138, ribonucleoside-diphosphate reductase, beta subunit, 155692 - 156831	44 kDa	0	0	0	0	0	0	0	0	0	0	0	0	0	0	0	0	0	0	0	0	0	0	0	0	0	0	0	0	0	0	0	0	0	0	0	0	0	0	0	0	0	0	0	0	0	0	0
302	BB2AT2_2957, ATP-dependent protease HslVU, peptidase subunit, 5045 - 5563	18 kDa	0	0	0	0	0	0	0	0	0	0	0	0	0	0	0	0	0	0	0	0	0	0	0	0	0	0	0	0	0	0	0	0	0	1	0	0	0	0	0	0	0	0	0	0	0	0	0
303	BB2AT2_1423, conserved hypothetical protein, 156024 - 156977	37 kDa	0	0	0	0	0	0	0	0	0	0	0	0	0	0	0	0	0	0	0	0	0	0	0	0	0	0	0	0	0	0	0	0	0	0	0	0	0	0	0	0	1	0	0	0	0	0	0
304	BB2AT2_2041, O-succinylhomoserine (thiol)-lyase, 644 - 1891	45 kDa	0	0	0	0	0	0	0	0	0	0	0	0	0	0	0	0	0	0	0	0	0	0	0	0	0	0	0	0	0	0	0	0	0	0	0	0	0	2	0	3	2	0	0	0	0	0	0
305	BB2AT2_3044, 4-hydroxythreonine-4-phosphate dehydrogenase, 41671 - 42663	35 kDa	0	0	0	0	0	0	0	0	0	0	0	0	0	0	0	0	0	0	0	0	0	0	0	0	0	0	0	0	0	0	0	0	0	0	0	0	0	0	0	0	0	0	0	0	0	0	0
306	BB2AT2_2409, porphobilinogen deaminase, 15875 - 16813	34 kDa	0	0	0	0	0	0	0	0	0	0	0	0	0	0	0	0	0	0	0	0	0	0	0	0	1	0	0	0	0	0	0	0	0	0	0	0	0	0	0	0	0	0	0	0	0	0	0
307	BB2AT2_2271, conserved hypothetical protein, 39183 - 39422	9 kDa	0	0	0	0	0	0	0	0	0	0	0	0	0	0	0	0	1	0	0	0	0	0	0	0	0	0	0	0	0	0	0	0	0	0	0	0	0	0	0	0	0	0	0	0	0	0	0
308	BB2AT2_0635, phosphoenolpyruvate carboxylase, 75305 - 77950	99 kDa	0	0	0	1	0	0	0	0	0	0	0	0	0	0	0	0	0	0	1	0	0	0	0	0	0	1	0	0	0	0	0	0	0	0	0	0	0	0	0	0	0	0	0	0	0	0	0
309	BB2AT2_1580, NADH:ubiquinone oxidoreductase, A subunit, 6383 - 7738	49 kDa	0	0	3	5	0	0	0	0	0	0	0	0	0	0	0	0	0	0	1	3	0	0	0	0	0	0	0	0	0	1	0	0	0	0	0	1	0	0	0	0	0	0	0	0	0	0	0
310	BB2AT2_0908, dihydrolipoamide dehydrogenase, 163929 - 165377	52 kDa	0	0	0	0	0	0	0	0	0	0	0	0	0	0	0	0	0	0	0	0	0	0	0	0	0	0	0	0	1	0	0	0	0	0	0	0	0	0	0	0	0	0	0	0	0	0	0
311	BB2AT2_4162, 2-hydroxy-3-oxopropionate reductase, 5054 - 5935	31 kDa	0	0	0	0	0	0	0	0	0	0	0	0	0	0	0	0	0	0	0	0	0	0	0	0	0	0	0	0	0	0	0	0	0	0	0	0	0	0	0	0	0	0	0	0	0	0	0
312	BB2AT2_1495, phosphoribosylaminoimidazole carboxylase, catalytic subunit, 64122 - 64604	16 kDa	0	0	0	0	0	0	0	0	0	0	0	0	0	0	0	0	0	0	0	0	0	0	0	0	0	0	0	0	0	0	0	0	0	0	0	0	0	0	0	0	0	0	0	0	0	0	0
313	BB2AT2_1638, argininosuccinate lyase, 68849 - 70714	68 kDa	0	0	0	0	0	0	0	0	0	0	0	0	0	0	0	0	0	0	0	0	0	0	0	0	0	0	0	0	0	1	0	0	0	0	0	0	0	0	0	0	0	0	0	0	1	0	0
314	BB2AT2_2814, A-type flagellin, 21301 - 22503	41 kDa	0	0	2	3	0	0	0	0	0	0	0	0	0	0	0	0	0	0	5	0	0	0	0	0	0	0	0	0	0	1	0	0	0	3	0	0	0	0	0	0	0	0	0	0	0	0	0
315	BB2AT2_1773, metallo-dependent hydrolase, 83705 - 84529	31 kDa	0	0	0	0	0	0	0	0	0	0	0	0	0	0	0	0	0	0	0	0	0	0	0	0	0	0	0	0	0	0	0	0	0	0	0	0	0	0	0	0	0	0	0	0	0	0	0
316	BB2AT2_0306, ATP phosphoribosyltransferase, 121683 - 122582	33 kDa	0	0	0	0	0	0	0	0	0	0	0	0	0	0	0	0	0	0	0	0	0	0	0	0	0	0	0	0	0	0	0	0	0	0	1	1	1	0	0	0	0	0	1	0	0	0	0
317	BB2AT2_2127, cysteinedesulfurase IscS, 94933 - 96150	?	0	0	0	0	0	0	0	0	0	0	0	0	0	0	0	0	0	0	0	0	0	0	0	0	0	0	0	0	0	1	0	0	1	0	0	0	0	0	0	0	0	0	0	1	0	0	0
318	BB2AT2_0431, fatty oxidation complex, alpha subunit FadJ, 51517 - 53739	80 kDa	0	0	0	0	1	0	0	0	0	0	0	0	0	0	0	0	0	0	0	2	1	0	0	0	0	0	0	0	0	0	0	0	0	0	1	2	0	0	0	0	0	0	0	0	0	0	0
319	BB2AT2_2670, dihydroorotate oxidase, 31204 - 32214	37 kDa	0	0	0	0	0	0	0	0	0	0	1	0	0	0	0	0	0	0	1	0	2	0	0	0	0	0	0	0	0	0	0	0	0	0	0	1	0	0	0	0	0	0	0	0	0	0	0
320	BB2AT2_2488, ATP-dependent Clp protease, proteolytic subunit ClpP, 1894 - 2511	23 kDa	0	0	0	0	0	0	0	0	0	0	0	0	0	0	0	0	0	0	0	0	0	0	0	0	0	0	0	0	0	0	0	0	0	0	0	0	0	0	0	0	0	0	0	0	0	0	0
321	BB2AT2_3485, ubiquinol-Cytochrome c reductase, iron-sulfur subunit, 41661 - 42251	21 kDa	1	0	1	0	0	0	0	0	0	0	0	1	0	0	0	0	0	0	1	1	0	0	0	0	0	0	0	2	0	0	0	0	1	0	0	0	0	0	0	0	0	2	8	6	1	0	0
322	BB2AT2_0020, molybdenum cofactor biosynthesis protein B, 28071 - 28610	20 kDa	0	0	0	0	0	0	0	0	0	0	0	0	0	0	0	0	0	0	0	0	0	0	0	0	0	0	0	0	0	0	0	0	0	0	0	0	0	0	0	0	0	0	0	0	0	0	0
323	BB2AT2_2754, carbonate dehydratase, 34239 - 34895	24 kDa	0	0	0	0	0	0	0	0	0	0	0	0	0	0	0	0	0	0	0	0	0	0	0	0	0	0	0	0	0	0	0	0	0	0	0	0	0	0	0	0	0	0	0	0	0	0	0
324	BB2AT2_2888, malate synthase G, 15713 - 17905	81 kDa	0	0	0	0	0	0	1	0	0	0	0	0	0	0	0	0	0	0	0	0	1	0	1	0	2	2	0	0	0	0	0	0	0	0	0	0	0	1	0	1	0	1	0	0	0	0	0
325	BB2AT2_2026, ribosomal protein S8, 104063 - 104455	14 kDa	0	0	0	0	0	0	0	0	0	0	0	0	1	0	0	0	0	0	0	0	0	0	0	0	0	0	0	0	0	0	2	1	0	0	0	1	1	0	0	0	0	0	0	0	0	0	0
326	BB2AT2_1353, RNA polymerase sigma factor RpoD, 86573 - 88420	71 kDa	0	0	0	1	2	1	0	0	0	0	0	0	0	0	0	0	0	0	0	0	0	0	0	0	0	0	0	0	1	0	0	0	0	0	0	0	0	0	0	0	0	0	1	1	2	0	0
327	BB2AT2_3126, hydrolase, 46134 - 48629	93 kDa	0	0	0	0	0	0	0	0	0	0	0	0	0	0	0	0	0	0	0	0	0	0	0	0	0	0	0	0	0	0	0	0	0	0	1	0	0	0	0	0	0	0	0	0	0	0	0
328	BB2AT2_0303, histidine biosynthesis bifunctional protein HisB, 118219 - 119280	39 kDa	0	0	0	0	0	0	0	0	0	0	0	0	0	0	0	0	1	0	0	0	0	0	0	0	0	1	0	0	0	0	0	0	0	0	0	0	0	0	0	0	0	0	1	0	0	0	0
329	BB2AT2_3033, RNA polymerase-associated protein RapA, 30069 - 32513	93 kDa	0	0	0	0	0	0	0	0	0	0	0	0	0	0	0	0	0	0	0	0	0	0	0	0	0	0	0	0	0	0	0	0	0	0	0	0	0	0	0	0	0	0	1	0	0	0	0
330	BB2AT2_1452, 3-hydroxydecanoyl-[acyl-carrier-protein] dehydratase, 20161 - 20352	7 kDa	0	0	0	0	0	0	0	0	0	0	0	0	0	0	0	0	0	0	0	0	0	0	0	0	0	0	0	0	0	0	0	0	0	0	0	1	0	0	0	0	0	5	5	3	1	0	0
331	BB2AT2_2578, dienelactone hydrolase, 22086 - 22976	33 kDa	0	0	0	0	0	0	0	0	0	0	0	3	2	0	0	0	0	0	0	0	1	0	0	0	0	0	2	12	12	0	0	0	0	0	0	0	0	0	0	0	0	0	0	0	0	0	0
332	BB2AT2_4183, transcription termination factor Rho, 4171 - 5430	47 kDa	0	0	0	0	0	0	0	0	0	0	0	0	0	0	0	0	0	0	0	1	0	0	0	0	0	0	0	0	0	0	0	0	0	0	0	2	0	0	0	0	0	0	0	0	1	0	0
333	BB2AT2_3441, inorganic diphosphatase PpaC, 3688 - 4566	33 kDa	0	0	0	0	1	0	0	0	0	0	0	0	0	0	0	0	0	0	0	0	0	0	0	0	0	0	0	0	0	0	0	1	0	0	0	1	0	0	0	0	0	0	0	0	0	0	0
334	BB2AT2_3112, ribosomal protein S10, 32828 - 33139	12 kDa	0	0	0	0	0	0	0	0	0	0	0	0	0	4	4	1	1	0	0	0	0	0	0	0	0	0	0	0	0	1	2	0	0	0	0	0	0	0	0	0	0	0	0	0	0	1	2
335	BB2AT2_2178, putativelipoprotein, 35415 - 35777	?	0	0	1	3	2	1	0	0	0	0	0	0	0	0	0	0	0	0	0	4	1	0	0	1	0	0	0	0	0	0	0	0	0	0	2	0	0	0	0	0	0	0	0	0	0	0	0
336	BB2AT2_3497, peptide chain release factor 1, 7101 - 8186	40 kDa	0	0	0	0	0	0	0	0	0	0	0	0	0	0	0	0	1	0	0	0	0	0	0	0	0	0	0	0	0	0	0	0	0	0	0	0	0	0	0	0	0	0	0	0	3	0	0
337	BB2AT2_0505, D-alanyl-D-alanine carboxypeptidase DacA, 119144 - 120304	42 kDa	0	0	0	0	0	0	0	0	0	0	0	1	0	0	0	0	0	0	0	0	0	0	0	0	0	0	0	0	0	0	0	0	0	0	0	0	0	0	0	0	0	0	1	0	0	0	0
338	BB2AT2_0612, homogentisate 1,2-dioxygenase, 52006 - 53304	48 kDa	0	0	0	0	0	0	0	0	0	0	0	0	0	0	0	0	0	0	0	0	0	0	0	0	0	0	0	0	0	0	0	0	0	0	0	0	0	0	0	0	0	0	0	0	0	0	0
339	BB2AT2_2677, aminopeptidase N, 44775 - 47369	98 kDa	0	0	0	0	0	0	0	0	1	0	0	0	0	0	0	0	0	0	0	0	0	0	0	0	0	0	0	0	0	0	0	0	0	0	0	0	0	0	0	0	0	0	0	0	0	0	0
340	BB2AT2_3487, cytochrome c1, 43513 - 44262	28 kDa	1	0	5	1	1	0	0	0	0	0	0	0	0	0	0	0	0	0	1	4	1	0	0	0	0	0	0	0	0	0	0	0	0	1	3	1	0	0	0	0	0	0	0	0	0	0	0
341	BB2AT2_0316, alkalinephosphatase 3, 131072 - 131491	?	0	0	0	0	0	0	0	0	0	0	0	0	0	0	0	0	0	0	0	0	0	0	0	1	4	1	1	0	0	0	0	0	0	0	1	0	0	0	2	12	7	1	0	0	0	1	0
342	BB2AT2_1823, methionine synthase, 15645 - 18275	98 kDa	0	0	0	0	0	0	0	0	0	0	0	0	0	0	0	0	0	0	0	0	0	0	0	0	0	0	0	0	0	0	1	0	0	0	0	0	0	0	0	0	0	0	0	1	0	0	0
343	BB2AT2_1716, tRNA 2-thiocytidine biosynthesis protein TtcA, 29252 - 30169	34 kDa	0	0	0	0	0	0	0	0	0	0	0	0	0	0	0	0	0	0	0	0	0	0	0	0	0	1	0	0	0	0	0	0	0	0	0	0	0	0	0	0	0	0	0	0	0	0	0
344	BB2AT2_3995, aerobic respiration control protein ArcA, 8949 - 9665	27 kDa	0	0	0	0	0	0	0	0	0	0	0	0	0	0	0	0	0	0	0	0	1	0	0	0	0	0	0	0	0	0	0	0	0	0	0	0	0	0	0	0	0	0	3	1	0	0	0
345	BB2AT2_2779, ATP-dependent Clp protease ATP-binding subunit ClpA, 55029 - 57290	84 kDa	0	1	0	0	0	0	0	0	0	0	0	0	0	0	0	0	0	0	0	0	1	0	0	0	0	0	0	0	0	0	0	0	0	0	0	0	1	0	0	0	0	0	0	0	0	0	0
346	BB2AT2_0330, conserved hypothetical protein, 146899 - 147717	31 kDa	0	0	0	0	0	0	0	0	0	0	0	0	0	0	0	0	0	0	0	0	0	0	0	0	0	0	0	0	0	0	0	0	0	0	0	0	0	0	0	0	0	1	6	8	2	1	0
347	BB2AT2_0301, 1-(5-phosphoribosyl)-5-[(5- phosphoribosylamino)methylideneamino] imidazole-4-carboxamide isomerase, 116864 - 117598	27 kDa	0	0	0	0	0	0	0	0	0	0	0	0	0	0	0	0	0	0	0	0	0	0	0	0	0	0	0	0	0	0	1	0	0	1	0	0	1	0	0	0	0	1	0	0	0	0	0
348	BB2AT2_0329, conserved hypothetical protein, 145878 - 146798	34 kDa	0	0	0	0	1	0	0	0	0	0	0	0	0	0	0	0	0	0	0	1	3	0	0	0	0	0	0	0	1	0	0	0	0	0	0	0	0	0	0	0	0	0	10	9	2	1	0
349	BB2AT2_3893, thiol:disulfide interchange protein DsbA, 20614 - 21237	23 kDa	0	0	0	0	1	0	0	0	0	0	0	0	0	1	5	8	0	0	0	0	0	0	0	0	0	0	0	0	0	1	7	0	0	0	0	0	0	0	0	0	0	0	0	0	1	3	0
350	BB2AT2_2970, histidine ammonia-lyase, 18432 - 19985	55 kDa	0	0	0	0	0	0	0	0	0	0	0	0	0	0	0	0	0	0	0	0	0	0	0	0	0	0	0	0	0	0	0	0	0	0	0	0	0	4	0	0	0	1	0	0	0	0	0
351	BB2AT2_2481, PspA/IM30, 79248 - 79940	25 kDa	0	0	0	2	1	0	0	0	0	0	0	0	0	0	0	0	0	0	0	2	1	0	0	0	0	0	0	0	0	0	0	0	0	0	0	1	0	0	0	0	0	0	2	1	0	0	0
352	BB2AT2_0394, TonB-dependent receptor, 11574 - 13796	81 kDa	0	0	1	5	1	0	0	1	0	0	0	0	0	0	0	0	0	0	1	3	0	0	0	0	0	0	0	0	0	0	0	0	0	0	0	0	0	0	0	0	0	0	0	0	0	0	0
353	BB2AT2_3734, glutathione S-transferase domain-containing protein, 5616 - 6233	23 kDa	0	0	0	0	0	0	0	0	0	0	0	0	0	0	0	0	0	0	0	0	0	0	0	0	0	0	0	0	0	0	0	0	0	0	0	0	0	0	0	0	0	0	0	0	0	0	0
354	BB2AT2_1496, ABC transporter ATP-binding protein, 64755 - 66359	60 kDa	0	0	0	0	0	0	0	0	0	0	0	0	0	0	0	0	0	0	0	0	0	1	0	0	0	0	0	0	0	0	0	0	0	0	0	0	0	0	0	0	0	0	0	0	0	0	0
355	BB2AT2_2639, glutaminyl-tRNA synthetase, 90 - 1754	64 kDa	0	0	0	0	1	0	0	0	0	0	0	0	0	0	0	0	0	0	0	0	1	0	0	0	0	0	0	0	0	0	0	0	0	0	0	1	0	0	0	1	1	0	0	0	0	0	0
356	BB2AT2_0328, amidohydrolase, 144454 - 145725	46 kDa	0	0	2	0	2	1	0	0	0	0	0	0	1	0	0	0	0	0	0	0	3	2	1	0	0	0	0	0	1	0	0	0	0	0	0	0	0	0	1	0	0	0	0	0	0	0	0
357	BB2AT2_3082, GTP-binding protein TypA/BipA, 6345 - 8168	67 kDa	0	0	0	0	0	0	1	0	0	0	0	0	0	0	0	0	0	0	1	0	0	0	0	0	0	0	0	0	0	0	0	1	0	0	0	0	0	0	0	0	0	0	0	0	0	0	0
358	BB2AT2_3181, outer membrane porin, 34628 - 35560	34 kDa	0	0	0	3	2	0	0	0	0	0	0	0	0	0	0	1	0	0	0	2	0	0	0	0	0	0	0	0	0	0	0	0	0	0	3	1	0	0	0	0	0	0	0	0	0	0	0
359	BB2AT2_0183, isobutyryl-CoA dehydrogenase, 207535 - 208692	42 kDa	0	0	0	0	0	0	0	0	0	0	0	0	0	0	0	0	0	0	0	0	0	0	0	0	0	0	0	0	0	0	0	0	0	0	0	0	0	0	0	0	0	0	0	0	0	0	0
360	BB2AT2_0034, putativeHpt domain, 38013 - 38357	?	0	0	0	0	0	0	0	0	0	0	0	0	0	0	0	0	0	0	0	0	0	0	0	0	0	0	0	0	0	0	0	0	0	0	0	0	0	0	0	0	1	1	0	0	0	0	0
361	BB2AT2_3537, prenylyltransferase domain-containing protein, 462 - 1157	26 kDa	0	0	0	0	0	0	0	0	0	0	0	0	3	0	0	0	0	0	0	0	0	0	0	0	0	0	0	3	1	0	0	0	0	0	0	0	0	0	6	2	3	0	0	1	0	0	0
362	BB2AT2_3499, responseregulator receiver modulated metal dependent phosphohydrolase, 9085 - 10035	?	0	0	0	0	0	0	0	0	0	0	0	0	0	0	0	0	0	0	0	0	0	0	0	0	0	0	0	0	0	0	0	0	0	0	0	0	0	0	0	0	0	0	0	0	0	0	0
363	BB2AT2_1352, ribosomal protein L11 methyltransferase, 85625 - 86506	32 kDa	0	0	0	0	0	0	0	0	0	0	0	0	0	0	0	0	0	0	0	0	0	0	0	0	0	0	0	0	0	0	0	0	0	0	0	0	0	0	0	0	0	0	0	0	0	0	0
364	BB2AT2_2402, NAD(P)H-flavin reductase, 7726 - 8439	27 kDa	0	0	0	0	0	0	0	0	0	0	0	0	0	0	0	0	0	0	0	0	0	0	0	0	0	0	0	0	0	0	0	0	0	0	0	0	0	0	0	0	2	13	1	2	0	0	0
365	BB2AT2_1342, beta-lactamase, 73290 - 74831	58 kDa	0	0	0	0	0	0	0	0	0	0	0	0	0	0	0	1	0	0	0	0	0	0	0	0	0	0	0	0	0	0	0	0	0	0	0	0	0	0	0	0	0	1	5	0	0	0	0
366	BB2AT2_0927, RNA polymerase-binding protein DksA, 3218 - 3661	19 kDa	0	0	0	0	0	0	0	0	0	0	0	0	0	0	0	0	0	0	0	0	0	0	0	0	0	0	0	0	0	0	0	0	0	0	0	0	0	0	0	0	0	0	0	0	0	0	0
367	BB2AT2_2377, lipoprotein-34 NlpB, 69501 - 70559	40 kDa	0	0	0	1	1	0	0	0	0	0	0	0	1	0	0	0	0	0	1	0	0	0	0	0	1	0	0	0	1	1	0	0	0	0	0	0	0	0	0	0	0	0	0	0	0	0	0
368	BB2AT2_1581, putativereductase pshaa2242, 8081 - 9274	?	0	0	0	0	0	0	0	0	0	0	0	0	0	0	0	0	0	0	0	0	0	0	0	0	0	0	0	0	0	0	0	0	0	0	0	0	0	0	0	0	0	0	0	0	0	0	0
369	BB2AT2_0315, alkalinephosphatase 3, 130737 - 131078	?	0	0	0	0	0	0	0	0	0	0	0	0	0	0	0	0	0	0	0	0	0	0	0	0	11	1	0	0	0	0	0	0	0	0	0	0	0	0	2	11	3	0	0	0	0	0	0
370	BB2AT2_2554, magnesium and cobalt efflux protein CorC, 75321 - 76205	33 kDa	0	0	0	0	0	0	0	0	0	0	0	0	0	0	0	0	0	0	0	0	0	0	0	0	0	0	0	0	0	0	0	0	0	0	0	0	0	0	0	0	0	0	0	0	0	0	0
371	BB2AT2_1893, TonB-dependent receptor, 85457 - 88048	94 kDa	0	0	4	2	2	0	0	0	0	0	0	0	0	0	0	0	0	1	0	2	2	0	0	0	0	0	0	0	0	0	0	0	0	0	2	1	0	0	0	0	0	0	0	0	0	0	0
372	BB2AT2_1765, acyl carrier protein, 78038 - 78274	9 kDa	0	0	0	0	0	0	0	0	0	0	0	0	0	0	0	0	0	0	0	0	0	0	0	0	0	0	0	0	0	0	0	0	0	0	0	0	0	0	0	0	0	0	0	0	0	0	0
373	BB2AT2_0896, UTP-glucose-1-phosphate uridylyltransferase, 155191 - 156069	32 kDa	0	0	0	0	0	0	0	0	0	0	0	0	0	0	0	0	0	0	0	0	0	0	0	0	0	0	0	0	0	0	0	0	0	0	0	0	0	0	0	0	0	0	0	0	0	0	0
374	BB2AT2_2975, neprilysin-2, 27562 - 29637	77 kDa	0	0	0	0	2	0	0	0	0	0	0	0	0	0	0	0	0	0	0	0	1	0	0	0	0	0	0	1	0	0	0	0	0	0	1	1	0	0	0	0	0	1	0	0	0	0	0
375	BB2AT2_1141, gamma-glutamyltransferase, 48528 - 50102	56 kDa	0	0	0	0	0	0	0	0	0	0	0	0	0	0	0	0	0	0	0	0	0	0	0	0	0	0	0	0	0	0	0	0	0	0	0	0	0	0	0	0	1	0	0	0	0	0	0
376	BB2AT2_0104, S-(hydroxymethyl)glutathione dehydrogenase/class III alcohol dehydrogenase, 118963 - 120084	40 kDa	0	0	0	0	0	0	0	0	0	0	0	0	0	0	0	0	0	0	0	0	0	0	0	0	0	0	0	0	0	0	0	0	0	0	0	0	0	0	0	0	0	0	0	0	0	0	0
377	BB2AT2_1846, dipeptidase, 44881 - 46368	54 kDa	0	0	0	0	0	0	0	0	0	0	0	0	0	0	0	0	0	0	0	0	0	0	0	0	0	0	5	0	0	0	0	0	0	0	0	0	0	0	0	0	0	9	1	0	1	0	0
378	BB2AT2_3244, glycyl-tRNA synthetase, alpha subunit, 27588 - 28490	34 kDa	0	0	0	0	0	0	0	0	0	0	0	0	0	0	0	0	0	0	0	0	0	0	0	0	0	0	0	0	0	0	0	0	0	0	0	0	0	0	0	0	0	0	0	0	0	0	0
379	BB2AT2_1828, isoquinoline 1-oxidoreductase subunit alpha, 20277 - 20774	18 kDa	0	0	0	0	0	0	0	0	1	9	5	0	0	0	0	0	0	0	0	0	0	0	0	0	1	9	2	2	0	0	0	0	0	0	0	0	0	0	0	0	0	0	0	0	0	0	0
380	BB2AT2_1245, radical SAM enzyme, Cfr family, 153203 - 154333	42 kDa	0	0	0	0	0	0	0	0	0	0	0	0	0	0	0	1	0	0	0	0	0	0	0	0	0	0	0	0	0	0	0	0	0	0	2	4	1	1	1	0	0	1	0	0	2	0	0
381	BB2AT2_0927, RNA polymerase-binding protein DksA, 3218 - 3661	17 kDa	0	0	0	0	0	0	0	0	0	0	0	0	0	0	0	0	0	0	0	0	0	0	0	0	0	0	0	0	1	0	0	0	0	0	0	0	0	0	0	0	0	0	0	5	5	1	0
382	BB2AT2_2998, dihydroxy-acid dehydratase, 54278 - 56134	66 kDa	0	0	0	0	0	0	0	0	0	0	0	0	0	1	0	0	0	0	0	0	0	0	0	0	0	0	0	0	0	0	0	0	0	0	0	0	0	0	0	1	1	0	0	0	0	0	0
383	BB2AT2_3437, CheC domain-containing protein, 1061 - 1528	17 kDa	0	0	0	0	0	0	0	0	0	0	0	0	0	0	0	0	0	0	0	0	0	0	0	0	0	0	0	0	0	0	0	0	0	0	0	0	0	0	0	0	0	0	0	0	0	0	0
384	BB2AT2_0468, conserved hypothetical protein, 86771 - 87226	17 kDa	0	0	0	0	0	0	0	0	0	0	0	0	0	0	0	0	0	0	0	0	0	0	0	0	0	0	0	0	0	0	0	0	0	0	0	0	0	0	0	0	0	0	0	0	0	0	0
385	BB2AT2_2146, YecA family protein, 7818 - 8393	21 kDa	0	0	0	0	0	0	0	0	0	0	0	0	0	0	0	0	0	0	0	0	0	0	0	0	0	0	0	0	0	0	0	0	0	0	0	0	0	0	0	0	0	0	0	0	0	0	0
386	BB2AT2_1054, signal peptide, 136282 - 137154	33 kDa	0	0	0	0	0	0	0	0	0	0	0	11	4	0	0	0	0	0	0	0	0	0	0	0	0	0	0	9	5	0	0	0	0	0	0	0	0	0	0	0	0	0	0	0	0	0	0
387	BB2AT2_4040, glutamine-fructose-6-phosphate transaminase, 2668 - 4488	66 kDa	0	0	0	0	0	0	0	0	0	0	0	0	0	0	0	0	0	0	0	0	1	0	0	0	0	0	0	0	0	0	0	0	0	0	0	0	1	0	0	0	0	0	0	0	0	0	0
388	BB2AT2_0807, transketolase, 62669 - 64660	72 kDa	0	0	0	0	0	0	0	0	0	0	0	0	0	0	0	0	0	0	0	0	0	0	0	0	0	0	0	0	0	0	0	0	0	0	0	0	0	0	0	0	0	0	1	0	0	0	0
389	BB2AT2_0111, conserved hypothetical protein, 127016 - 127477	18 kDa	0	0	0	0	0	0	0	0	0	0	1	0	0	0	0	0	0	0	0	0	0	0	0	0	0	0	0	0	0	0	0	0	0	0	0	0	1	0	0	0	0	1	0	0	0	0	0
390	BB2AT2_3587, tRNA (mo5U34)-methyltransferase, 3041 - 3667	24 kDa	0	0	0	0	0	0	0	0	0	0	0	0	0	0	0	0	0	1	0	0	0	0	0	0	0	0	0	0	0	0	0	0	0	0	0	0	0	0	0	0	0	0	0	0	0	0	0
391	BB2AT2_2236, signal transduction protein, 88966 - 89805	31 kDa	0	0	0	0	0	0	0	0	0	0	0	0	0	0	0	0	0	0	0	0	0	0	0	0	1	0	0	9	2	0	0	0	0	0	0	0	0	0	0	0	0	0	1	0	0	0	0
392	BB2AT2_4002, putativeFe(2+)-trafficking protein, 14968 - 15240	?	0	0	0	0	0	0	0	0	0	0	0	0	0	0	0	0	0	0	0	0	0	0	0	0	0	0	0	0	1	0	0	0	0	0	0	0	0	0	0	0	0	0	1	7	2	1	0
393	BB2AT2_1055, phosphoribulokinase, chromosomal, 137271 - 138170	34 kDa	0	0	0	0	0	0	0	0	0	0	0	0	0	0	0	0	0	0	0	0	0	0	0	0	0	0	0	0	0	0	0	0	0	0	0	0	0	0	0	0	0	0	0	0	0	0	0
394	BB2AT2_3538, peptidoglycan-associated lipoprotein, 1225 - 1767	20 kDa	0	0	3	0	0	0	0	0	0	0	0	0	0	0	0	0	0	0	2	0	1	0	0	0	0	0	1	1	0	0	0	0	0	2	2	1	0	0	0	0	0	0	0	0	0	0	0
395	BB2AT2_2492, peptidyl-prolyl cis-trans isomerase D, 7097 - 8998	70 kDa	0	0	1	0	0	0	0	0	0	1	0	0	0	1	0	0	0	0	0	0	0	0	0	0	0	0	0	0	0	0	0	0	0	1	0	0	0	1	0	0	0	0	1	0	0	0	0
396	BB2AT2_0247, glycogendebranching enzyme GlgX, 57612 - 59675	?	0	0	0	0	0	0	0	0	0	0	0	0	0	0	0	0	1	0	0	0	0	0	0	0	0	0	0	0	0	1	0	0	0	0	1	1	0	0	1	1	0	0	0	0	0	0	0
397	BB2AT2_3286, pilin biogenesis protein, 10408 - 13623	117 kDa	0	0	0	0	0	0	0	0	0	0	0	0	0	0	0	0	0	0	0	0	0	0	0	0	0	0	0	0	0	0	0	0	0	0	0	0	0	0	0	0	0	0	0	0	0	0	0
398	BB2AT2_2134, metal dependent phosphohydrolase, 101805 - 103466	62 kDa	0	0	0	0	0	0	0	0	0	0	0	0	0	0	0	0	0	0	0	0	0	0	0	0	0	0	1	2	0	0	0	0	0	0	0	0	0	0	0	0	0	0	0	0	0	0	0
399	BB2AT2_2097, protein TldD, 60446 - 61885	51 kDa	0	0	0	0	0	0	0	0	0	0	0	0	0	0	0	0	0	0	0	0	0	0	0	0	0	0	0	0	0	0	0	0	0	0	0	0	0	0	0	0	3	0	0	0	0	0	0
400	BB2AT2_2726, tryptophan biosynthesis protein trpCF, 9607 - 10971	50 kDa	0	0	0	0	0	0	0	0	0	0	0	0	0	0	0	0	0	0	0	0	0	0	0	0	0	5	3	2	0	0	0	0	0	0	0	0	0	0	0	1	6	0	0	0	0	0	0
401	BB2AT2_3605, cystathionine beta-lyase, 18754 - 19932	43 kDa	0	0	0	0	0	0	0	0	0	0	0	0	0	0	0	0	0	0	0	0	0	0	0	0	0	0	0	0	0	0	0	0	0	0	0	0	0	0	0	1	0	0	0	0	0	0	0
402	BB2AT2_1455, isocitrate dehydrogenase, 20883 - 21740	32 kDa	0	0	0	0	0	0	0	0	0	0	0	0	0	0	0	0	0	0	0	0	0	0	0	0	0	0	0	0	0	0	0	0	0	0	0	0	0	0	0	0	1	1	0	0	0	0	0
403	BB2AT2_0941, redoxin,16446 - 17105	?	0	0	0	0	0	0	0	0	0	0	0	0	0	0	0	0	0	0	0	0	0	0	0	0	0	0	0	0	0	0	0	0	0	0	0	0	0	0	0	0	0	0	0	0	0	0	0
404	BB2AT2_2147, Xaa-Pro aminopeptidase, 8420 - 9742	49 kDa	0	0	0	0	0	1	0	0	0	0	0	0	0	0	0	0	0	0	0	0	0	0	0	0	0	0	0	0	1	0	0	0	0	0	0	0	0	0	0	0	0	0	0	0	0	0	0
405	BB2AT2_2520, outer membrane protein assembly complex, YaeT protein, 37115 - 39586	92 kDa	0	0	0	4	0	0	0	0	0	0	0	0	0	0	0	0	0	0	0	3	0	0	0	0	0	0	0	0	0	0	0	0	0	1	4	0	0	0	0	0	0	0	0	0	0	0	0
406	BB2AT2_0693, peroxiredoxin, 135114 - 135683	21 kDa	0	0	0	0	0	0	0	0	0	0	0	0	0	0	0	0	0	0	0	0	0	0	0	0	0	0	0	0	0	0	0	0	0	0	0	0	0	0	0	0	0	0	0	0	0	0	0
407	BB2AT2_1766, beta-ketoacyl-acyl-carrier-protein synthase II, 78546 - 79784	43 kDa	0	0	0	0	0	0	0	0	0	0	0	0	0	0	0	0	0	0	0	0	0	0	0	0	0	0	0	1	0	0	0	0	0	0	0	0	0	0	0	0	0	0	0	0	0	0	0
408	BB2AT2_2598, carbamoyl-phosphate synthase, small subunit, 37614 - 38825	44 kDa	0	0	0	0	0	0	0	0	0	0	0	0	0	0	0	0	0	0	0	0	0	0	0	0	0	0	0	1	0	0	0	0	0	0	0	0	0	0	0	0	0	0	0	0	0	0	0
409	BB2AT2_0888, phosphopyruvate hydratase, 145516 - 146814	46 kDa	0	0	0	0	0	0	0	0	0	0	0	0	0	0	0	0	0	0	0	0	0	0	0	0	0	0	0	0	0	0	0	0	0	0	0	0	0	0	0	0	1	0	0	0	0	0	0
410	BB2AT2_0285, isocitrate dehydrogenase (NADP(+)), 98900 - 99907	36 kDa	0	0	0	0	0	0	0	0	0	0	0	0	0	0	0	0	0	0	0	0	0	0	0	0	0	0	0	0	0	0	0	0	0	0	0	0	0	0	0	0	0	2	3	1	0	0	0
411	BB2AT2_3873, chaperonin HslO, 3756 - 4601	32 kDa	0	0	0	0	0	0	0	0	0	0	0	0	0	0	0	0	0	0	0	0	0	0	0	0	0	0	0	0	0	0	0	0	0	0	0	0	0	0	0	0	0	0	0	0	0	0	0
412	BB2AT2_0299, histidine biosynthesis bifunctional protein hisIE, 115498 - 116112	23 kDa	0	0	0	0	0	0	0	0	0	0	0	0	0	0	0	0	0	0	0	0	0	0	0	0	0	0	0	0	0	0	0	0	0	0	0	0	0	0	0	0	0	0	0	0	0	0	0
413	BB2AT2_2792, seryl-tRNA synthetase, 68787 - 70091	48 kDa	0	0	0	0	0	0	0	0	0	0	0	0	0	0	0	0	0	0	0	0	0	0	0	0	0	0	0	0	0	0	0	0	0	0	0	0	0	0	0	0	0	0	0	0	0	0	0
414	BB2AT2_0293, O-acetylhomoserine (thiol)-lyase, 110301 - 111572	45 kDa	0	0	0	0	0	0	0	0	0	0	0	0	0	0	0	0	0	0	0	0	0	0	0	0	0	0	0	0	0	0	0	0	0	0	0	0	0	0	0	0	0	0	0	0	0	0	0
415	BB2AT2_0358, hemagglutinin/proteinase, 171389 - 177685	229 kDa	0	0	0	0	0	0	0	0	0	0	0	0	0	0	0	0	0	0	0	0	0	0	0	0	0	0	0	0	0	0	0	0	0	0	0	0	0	0	0	0	0	0	0	0	0	0	0
416	BB2AT2_1733, N-carbamoylputrescine amidase, 49448 - 50341	33 kDa	0	0	0	0	0	0	0	0	0	0	0	0	0	0	0	0	0	0	0	0	0	0	0	0	0	0	0	0	0	0	0	0	0	0	0	0	0	0	0	0	0	0	0	0	0	0	0
417	BB2AT2_3097, sulfite reductase (NADPH) flavoprotein, alpha-component, 22233 - 24044	66 kDa	0	0	0	0	0	0	0	0	0	0	0	0	0	0	0	0	0	0	0	0	0	0	0	0	0	0	0	0	0	0	0	0	0	0	0	0	0	0	0	0	0	0	0	0	0	0	0
418	BB2AT2_3899, tRNA (uracil-5-)-methyltransferase, 22421 - 23518	42 kDa	0	0	0	0	0	0	0	0	0	0	0	0	0	0	0	0	0	0	0	0	0	0	0	0	0	0	0	0	0	0	0	0	0	0	0	0	0	0	0	0	0	0	0	0	0	0	0
419	BB2AT2_3457, fructose-1,6-bisphosphatase, 17662 - 18630	35 kDa	0	0	0	0	0	0	0	0	0	0	0	0	0	0	0	0	0	0	0	0	0	0	0	0	0	0	0	0	0	0	0	0	0	0	0	0	0	0	0	0	0	0	0	0	0	0	0
420	BB2AT2_3261, ATP synthase F0, B subunit, 47188 - 47658	17 kDa	0	0	1	0	2	0	0	0	0	0	0	0	0	0	0	0	0	0	0	1	1	0	0	0	1	1	0	0	0	0	0	0	0	3	2	1	0	1	1	1	0	0	0	0	0	0	0
421	BB2AT2_0127, putativeNAD(P)H nitroreductase YdjA, 147815 - 148363	?	0	0	0	0	0	0	0	0	0	0	0	0	0	0	0	0	0	0	0	0	0	0	0	0	0	0	0	0	0	0	0	0	0	0	0	0	0	0	0	0	0	0	0	0	0	0	0
422	BB2AT2_3682, conserved hypothetical protein, 12134 - 12532	15 kDa	0	0	0	0	0	0	0	0	0	0	0	0	0	0	0	0	0	0	0	0	0	0	0	0	0	0	0	0	0	0	0	0	0	0	0	0	0	0	0	1	0	0	0	0	0	0	0
423	BB2AT2_1493, endonuclease/exonuclease/phosphatase family protein, 61702 - 62865	44 kDa	0	0	0	0	0	0	1	0	0	0	0	0	0	1	0	0	0	0	0	0	0	0	0	0	0	0	0	0	0	0	4	0	0	0	0	0	0	0	0	0	0	0	0	0	0	1	0
424	BB2AT2_0385, triosephosphate isomerase, 5763 - 6152	13 kDa	0	0	0	0	0	0	0	0	0	0	0	0	0	0	0	0	1	0	0	0	0	0	0	0	0	0	0	0	0	0	0	0	0	0	0	0	0	0	0	1	0	0	0	0	0	0	0
425	BB2AT2_2608, co-chaperone GrpE, 46027 - 46641	23 kDa	0	0	0	0	0	0	0	0	0	0	0	0	0	0	0	0	0	0	0	0	0	0	0	0	0	0	0	0	0	0	0	0	0	0	0	0	0	0	0	0	0	0	0	0	1	0	0
426	BB2AT2_0640, dsba oxidoreductase, 81214 - 81873	25 kDa	0	0	0	0	0	0	0	0	0	0	0	0	0	0	0	0	0	0	0	0	0	0	0	0	0	0	0	0	0	0	0	0	0	0	0	0	0	0	0	0	0	0	0	0	0	0	0
427	BB2AT2_2100, glutathione-disulfide reductase, 63927 - 65288	49 kDa	0	0	0	0	0	0	0	0	0	0	0	0	0	0	0	0	0	0	0	0	0	0	0	0	0	0	0	0	0	0	0	0	0	0	0	0	0	0	0	0	0	0	0	0	0	0	0
428	BB2AT2_0156, conserved hypothetical protein, 174529 - 175536	38 kDa	0	0	0	0	0	0	0	0	0	0	0	0	0	0	0	0	0	0	0	0	0	0	0	0	0	0	0	0	0	0	0	0	0	0	0	0	0	1	0	0	0	0	0	1	0	0	0
429	BB2AT2_0404, signal recognition particle protein, 26109 - 27488	50 kDa	0	0	0	0	0	0	0	0	0	0	0	0	0	0	0	0	0	0	0	0	0	0	0	0	0	0	0	0	0	0	0	0	0	0	0	0	0	0	0	0	0	0	0	0	0	1	0
430	BB2AT2_0217, AKR5D, 23315 - 24130	31 kDa	0	0	0	0	0	0	0	0	0	0	0	0	0	0	0	0	0	0	0	0	0	0	0	0	0	0	0	0	0	0	0	0	0	0	0	0	0	0	0	0	0	0	0	0	0	0	0
431	BB2AT2_2112, putatIvetype i restriction enzyme hindviip m protein, 77381 - 78994	?	0	0	0	0	0	1	0	0	0	0	0	0	0	0	0	0	0	0	0	0	0	0	0	0	0	0	0	0	0	0	0	0	0	0	0	0	0	0	0	0	0	0	1	0	0	0	0
432	BB2AT2_0113, translation initiation factor IF-3, 129831 - 130391	21 kDa	1	0	0	0	0	0	0	0	0	0	0	0	0	0	0	0	0	0	0	0	0	0	0	0	0	0	0	0	0	0	0	0	0	0	0	0	0	0	0	0	1	1	4	3	2	1	0
433	BB2AT2_1952, conserved hypothetical protein, 30770 - 31150	14 kDa	0	0	0	0	0	0	0	0	0	0	0	0	0	0	0	0	0	0	0	0	0	0	0	0	0	0	0	0	0	0	0	0	0	0	0	0	0	0	0	0	0	0	0	0	0	0	0
434	BB2AT2_1396, iron uptake protein A1, 129792 - 130796	37 kDa	0	0	0	0	0	0	0	0	0	0	0	0	0	0	0	0	0	0	0	0	0	0	0	0	0	0	0	0	0	0	0	1	0	0	2	5	3	3	3	0	0	0	0	0	0	0	0
435	BB2AT2_0042, succinyl-diaminopimelate desuccinylase, 44781 - 45911	41 kDa	0	0	0	0	0	0	0	0	0	0	0	0	0	0	0	0	1	0	0	0	0	0	0	0	0	0	0	0	0	0	0	0	0	0	1	0	0	0	0	0	0	0	0	0	0	0	0
436	BB2AT2_0648, 3-oxoacyl-(acyl-carrier-protein) synthase 3, 86973 - 88052	38 kDa	0	0	0	0	0	0	0	0	0	0	0	0	0	0	0	0	0	0	0	0	0	0	0	0	0	0	0	0	0	0	0	0	0	0	0	0	0	0	0	0	0	0	0	0	0	0	0
437	BB2AT2_4059, amidophosphoribosyltransferase, 7261 - 8787	56 kDa	0	0	0	0	0	0	0	0	0	0	0	0	0	0	0	0	0	0	0	0	0	0	0	0	1	0	0	0	0	0	0	1	0	0	0	0	0	0	0	0	0	0	0	0	0	0	0
438	BB2AT2_2057, tryptophan--tRNA ligase, 18076 - 19080	38 kDa	0	0	0	0	0	0	0	0	0	0	0	0	0	0	0	0	0	0	0	0	0	0	0	0	0	0	0	0	0	0	0	0	0	0	0	0	0	0	0	0	0	0	0	0	0	0	0
439	BB2AT2_1487, conserved hypothetical protein, 53877 - 54605	27 kDa	0	0	0	0	0	0	0	0	1	0	0	0	0	0	0	0	0	0	0	0	0	2	3	4	3	0	0	0	0	0	0	0	0	0	0	0	2	1	2	0	0	0	0	0	0	0	0
440	BB2AT2_3800, conserved hypothetical protein, 15886 - 16428	21 kDa	0	0	0	0	0	0	0	0	0	0	0	0	0	0	0	0	0	0	0	2	6	1	0	0	0	0	0	0	0	0	0	0	0	0	2	3	2	1	1	1	2	0	0	0	0	0	0
441	BB2AT2_0114, ribosomal protein L20, 130819 - 131181	14 kDa	0	0	0	0	0	0	0	0	0	0	0	0	0	0	0	0	0	0	0	0	0	0	0	0	0	0	0	0	0	0	0	0	0	0	0	0	0	0	0	0	0	0	0	0	0	0	0
442	BB2AT2_3468, 3-deoxy-D-manno-octulosonate 8-phosphate phosphatase, 28089 - 28640	20 kDa	0	0	0	0	0	0	0	0	0	0	0	0	0	0	0	0	0	0	0	0	0	0	0	0	0	0	0	0	0	0	0	0	0	0	0	0	0	0	0	0	0	0	0	0	0	0	0
443	BB2AT2_2775, amidohydrolase protein, 50187 - 51431	44 kDa	0	0	0	0	0	0	0	0	0	0	0	0	0	0	0	0	0	0	0	0	1	0	0	0	0	0	0	0	0	0	0	0	0	0	0	0	0	0	0	0	0	0	0	0	0	0	0
444	BB2AT2_1926, regulator of sigma D, 5138 - 5608	18 kDa	0	0	0	0	0	0	0	0	0	0	0	0	0	0	0	0	0	0	0	0	0	0	0	0	0	0	0	0	0	0	0	0	0	0	0	0	0	0	0	0	0	0	0	0	0	0	0
445	BB2AT2_3479, proteaseDegQ, 36818 - 38170	?	0	0	0	0	0	0	0	0	0	0	0	0	0	1	1	9	1	1	0	0	0	0	0	1	0	0	0	0	0	0	0	0	0	0	0	0	0	0	0	0	0	0	0	0	0	0	0
446	BB2AT2_3050, protein YgiQ, 46876 - 49056	81 kDa	0	0	0	0	0	0	0	0	0	0	0	0	0	0	0	0	0	0	0	0	0	0	0	0	0	0	0	0	0	0	0	0	0	0	0	0	0	0	0	0	0	0	0	0	0	0	0
447	BB2AT2_2001, inner membrane lipoprotein YiaD, 76400 - 77032	22 kDa	0	0	1	0	0	0	0	0	0	0	0	0	0	0	0	0	0	0	0	0	0	0	0	0	0	0	0	0	6	1	0	0	0	1	0	0	0	0	0	0	0	1	0	0	0	0	0
448	BB2AT2_2978, protein PmbA, 30648 - 31997	48 kDa	0	0	0	0	0	1	0	0	0	0	0	0	0	0	0	0	0	0	0	0	0	0	0	0	0	0	0	0	0	0	0	0	0	0	0	0	0	0	0	0	0	0	0	0	0	0	0
449	BB2AT2_0962, glyoxalase domain protein, 47690 - 48109	16 kDa	0	0	0	0	0	0	0	0	0	0	0	0	0	0	0	0	0	0	0	0	0	0	0	0	0	0	0	0	0	0	0	0	0	0	0	0	0	0	0	0	0	0	0	0	0	0	0
450	BB2AT2_1292, DNA, 24633 - 25472	32 kDa	0	0	0	0	0	0	0	0	0	0	0	0	0	0	0	0	0	0	0	0	0	0	0	0	0	0	0	0	0	0	0	0	0	0	0	0	0	0	0	0	0	0	0	0	1	0	0
451	BB2AT2_2294, deoxyribose-phosphate aldolase, 64417 - 65160	26 kDa	0	0	0	0	0	0	0	0	0	0	0	0	0	0	0	0	0	0	0	0	0	0	0	0	0	0	0	0	0	0	0	0	0	0	0	0	0	0	0	0	0	0	0	0	0	0	0
452	BB2AT2_0029, deoxycytidine triphosphate deaminase, 35038 - 35625	22 kDa	0	0	0	0	0	0	0	0	0	0	0	0	0	0	0	0	0	0	0	0	0	0	0	0	0	0	0	0	0	0	0	0	0	0	0	0	0	0	0	0	0	0	0	0	0	0	0
453	BB2AT2_2594, L, D-carboxypeptidase A, 32444 - 33502	39 kDa	0	0	0	0	0	0	0	0	0	0	0	0	0	0	0	0	0	0	0	0	0	0	0	0	0	0	0	3	0	0	0	0	0	0	0	0	0	0	0	0	0	0	0	0	0	0	0
454	BB2AT2_0840, formyltetrahydrofolate deformylase, 94513 - 95343	31 kDa	0	0	0	0	0	0	0	0	0	0	0	0	0	0	0	0	0	0	0	0	0	0	0	0	0	0	0	0	0	0	0	0	0	0	0	0	0	0	6	2	0	0	0	0	0	0	0
455	BB2AT2_1104, aldehydedehydrogenase, 8326 - 9846	?	0	0	0	0	0	0	0	0	0	0	0	0	0	0	0	0	1	0	0	0	0	0	0	0	0	0	0	0	0	0	0	0	0	0	0	0	0	0	0	0	0	0	0	0	0	0	0
456	BB2AT2_3223, peptide deformylase, 7899 - 8405	19 kDa	0	0	0	0	0	0	0	0	0	0	0	0	0	0	0	0	0	0	0	0	0	0	0	0	0	0	0	0	0	0	0	0	0	0	0	0	0	0	0	0	0	0	0	0	0	0	0
457	BB2AT2_3753, TonB-dependent receptor, 27389 - 29929	91 kDa	0	0	1	1	0	0	0	0	0	0	0	0	0	0	0	0	0	0	0	3	1	0	0	0	0	0	0	0	0	0	0	0	0	0	2	0	0	0	0	0	0	0	0	0	0	0	0
458	BB2AT2_3093, aconitate hydratase 1, 16191 - 18932	100 kDa	0	0	0	0	0	0	0	0	0	0	0	0	0	0	0	0	0	0	0	0	0	0	0	0	0	0	0	0	0	0	0	0	0	0	0	0	0	0	0	0	0	0	0	0	0	0	0
459	BB2AT2_2806, flagellar hook protein FlgE, 11710 - 13080	48 kDa	0	0	1	0	0	0	0	0	0	0	0	0	0	0	0	0	0	0	1	0	0	0	0	0	0	0	0	0	1	1	0	0	0	1	0	0	0	0	0	0	0	0	0	0	0	0	0
460	BB2AT2_3824, TonB-dependent receptor, 9219 - 11786	93 kDa	0	0	2	2	0	0	0	0	0	0	0	0	0	0	0	0	0	0	0	2	0	0	0	0	0	0	0	0	0	0	0	0	0	0	1	0	0	0	0	0	0	0	0	0	0	0	0
461	BB2AT2_1404, octaprenyl pyrophosphate synthetase, 136406 - 137098	25 kDa	0	0	0	0	0	0	0	0	0	0	0	0	0	0	0	1	0	0	0	0	0	0	0	0	0	0	0	0	0	0	0	0	0	0	0	0	0	0	0	0	0	0	0	0	0	0	0
462	BB2AT2_0221, dihydrodipicolinate synthase, 25425 - 26342	33 kDa	0	0	0	0	0	0	0	0	0	0	0	0	0	0	0	0	0	0	0	0	0	0	0	0	0	0	0	0	0	0	0	0	0	0	0	0	0	0	0	0	0	0	0	0	0	0	0
463	BB2AT2_3963, conserved hypothetical protein, 18992 - 19780	30 kDa	0	0	0	0	0	0	0	0	0	0	0	0	0	0	0	0	0	0	0	0	0	0	0	0	0	0	0	0	0	0	0	0	0	0	0	0	0	0	0	0	0	0	0	0	0	0	0
464	BB2AT2_0144, phosphoserine transaminase, 163969 - 165051	40 kDa	0	0	1	0	0	0	0	0	0	0	0	0	0	0	0	0	0	0	0	0	0	0	0	0	0	0	0	0	0	0	0	0	0	0	0	0	0	0	0	0	0	0	0	0	0	0	0
465	BB2AT2_1679, conserved hypothetical protein, 102987 - 104534	57 kDa	0	0	3	2	1	1	0	0	0	0	0	0	0	0	0	0	0	0	0	0	1	0	0	0	0	0	0	0	0	0	0	0	0	1	3	1	0	0	1	0	0	0	0	0	0	0	0
466	BB2AT2_1901, ketol-acid reductoisomerase, 93975 - 95447	54 kDa	0	0	0	0	0	0	0	0	0	0	0	0	0	0	0	0	0	0	0	0	0	0	0	0	0	0	0	0	0	0	0	0	0	0	0	0	0	0	0	0	0	0	0	0	0	0	0
467	BB2AT2_3840, queuine synthase, 38 - 883	32 kDa	0	0	0	0	0	0	0	0	0	0	0	0	0	0	0	0	0	0	0	0	0	0	0	0	0	0	0	0	0	0	0	0	0	0	0	0	0	0	0	0	0	0	0	0	0	0	0
468	BB2AT2_2020, conserved hypothetical protein, 98752 - 99915	44 kDa	0	0	0	0	0	0	0	0	0	0	0	0	0	0	0	0	0	0	0	0	0	0	0	0	0	0	0	0	0	0	0	0	0	0	0	1	0	0	0	0	0	0	0	0	0	0	0
469	BB2AT2_0186, 3-hydroxyisobutyrate dehydrogenase, 210650 - 211549	31 kDa	0	0	0	0	0	0	0	0	0	0	0	0	1	0	0	0	0	0	0	0	0	0	0	0	0	0	0	0	0	0	0	0	0	0	0	0	0	0	0	0	0	0	0	0	0	0	0
470	BB2AT2_4041, putativeesterase, 4601 - 5791	?	0	0	0	0	1	0	0	0	0	0	0	0	0	0	0	0	0	0	0	0	0	0	0	0	9	1	0	0	0	0	0	0	0	0	0	0	0	0	0	2	0	0	0	0	0	0	0
471	BB2AT2_4166, putative leucine Rich Repeat, 1202 - 7344	230 kDa	0	0	0	0	0	0	0	0	0	0	0	0	0	0	0	0	0	0	0	0	0	0	0	0	0	0	0	0	0	0	0	0	0	0	0	0	0	0	0	0	0	0	0	0	0	0	0
472	BB2AT2_3316, cellulose synthase operon protein YhjU, 36403 - 37983	59 kDa	0	0	0	0	0	0	0	1	0	0	0	0	0	0	0	0	0	0	0	0	0	0	0	0	0	0	0	0	0	0	0	0	0	0	0	0	0	0	0	0	0	0	0	0	0	0	0
473	BB2AT2_3982, protein hfq, 15532 - 15795	10 kDa	0	0	0	0	0	0	0	0	0	0	0	0	0	0	0	0	0	0	0	0	0	0	0	0	0	0	0	0	0	0	0	0	0	0	0	1	2	0	0	0	0	0	0	0	0	0	0
474	BB2AT2_2161, alanine racemase, 19840 - 20919	39 kDa	0	0	0	0	0	0	0	0	0	0	0	0	0	0	0	0	0	0	0	0	0	0	0	0	0	0	0	0	0	0	0	0	0	0	1	0	0	0	1	1	1	0	0	0	0	0	0
475	BB2AT2_1216, succinylarginine dihydrolase, 120460 - 121806	49 kDa	0	0	0	1	0	0	0	0	0	0	0	0	0	0	0	0	0	0	0	0	0	0	0	0	0	0	0	0	0	0	0	0	0	0	0	0	0	0	0	0	0	0	0	0	0	0	0
476	BB2AT2_1760, conserved hypothetical protein, 74295 - 74819	19 kDa	0	0	0	0	0	0	0	0	0	0	0	0	0	0	0	0	0	0	0	0	0	0	0	0	0	0	0	0	0	0	0	0	0	0	0	0	0	0	0	0	0	0	0	0	0	0	0
477	BB2AT2_1144, N-carbamoyl-L-amino-acid hydrolase, 52169 - 53455	46 kDa	0	0	0	0	0	0	0	0	0	0	0	0	0	1	0	0	0	0	0	0	0	0	0	4	10	1	1	0	0	0	0	0	0	0	0	0	0	0	0	0	0	0	0	0	0	0	0
478	BB2AT2_3107, ribosomal protein L22, 29759 - 30091	12 kDa	0	0	0	0	0	0	0	0	0	0	0	0	0	0	0	0	0	0	0	0	0	0	0	0	0	0	0	0	1	0	0	0	0	0	0	0	0	0	0	0	0	0	1	0	2	0	0
479	BB2AT2_3070, acyltransferase, 23 - 916	34 kDa	0	0	0	0	0	0	0	0	0	0	0	0	0	0	0	0	0	0	0	0	0	0	0	0	0	0	0	0	0	0	0	0	0	0	0	0	0	0	0	0	0	0	0	0	0	0	0
480	BB2AT2_3042, LPS-assembly protein, 38028 - 40280	85 kDa	0	0	0	1	0	0	0	0	0	0	0	0	0	0	0	0	0	0	0	1	1	0	0	0	0	0	0	0	0	0	0	0	0	0	2	0	0	0	0	0	0	0	0	0	0	0	0
481	BB2AT2_0639, peptidase M24, 79883 - 81103	45 kDa	0	0	0	0	0	0	0	0	0	0	0	0	0	0	0	0	0	0	0	0	0	0	0	0	0	0	0	0	0	0	0	0	0	0	0	0	0	0	2	2	1	1	0	0	0	0	0
482	BB2AT2_1528, lactoylglutathione lyase, 98494 - 99021	20 kDa	0	0	0	0	0	0	0	0	0	0	0	0	0	0	0	0	0	0	0	0	0	0	0	0	0	0	0	0	0	0	0	0	0	0	0	0	0	0	0	0	0	0	0	0	0	0	0
483	BB2AT2_1627, transcriptional regulator, 62601 - 63254	25 kDa	0	0	0	0	0	0	0	0	0	0	0	0	0	0	0	0	0	0	0	0	0	0	0	0	0	0	0	0	0	0	0	0	0	0	0	0	0	0	0	0	0	0	0	0	0	0	0
484	BB2AT2_1937, secretedprotein, 18650 - 19243	?	0	0	0	0	0	0	0	0	0	4	2	0	0	0	0	0	0	0	0	0	0	0	0	0	0	4	6	1	0	0	0	0	0	0	0	0	0	0	0	0	0	0	0	0	0	0	0
485	BB2AT2_1337, 5-carboxymethyl-2-hydroxymuconate delta isomerase, 70368 - 70697	13 kDa	0	0	0	0	0	0	0	0	0	0	0	0	0	0	0	0	0	0	0	0	0	0	0	0	0	0	0	0	0	0	0	0	0	0	0	0	0	0	0	0	0	0	0	0	0	0	0
486	BB2AT2_3292, 4-hydroxy-3-methylbut-2-enyl diphosphate reductase, 17558 - 18487	34 kDa	0	0	0	0	0	0	0	0	0	0	0	0	0	0	0	0	0	0	0	0	0	0	0	0	0	0	0	0	0	0	0	0	0	0	0	0	0	0	0	0	0	0	0	0	0	0	0
487	BB2AT2_0116, metallo-hydrolase/oxidoreductase domain-containing protein, 133335 - 133976	24 kDa	0	0	0	0	0	0	0	0	0	0	0	10	4	0	0	0	0	0	0	0	0	0	0	0	0	0	0	2	0	0	0	0	0	0	0	0	0	0	0	0	0	0	0	0	0	0	0
488	BB2AT2_1405, ribosomal protein L21, 137520 - 137831	11 kDa	0	0	0	0	0	0	0	0	0	0	0	0	0	0	0	0	0	0	0	0	0	0	0	0	0	0	0	0	0	0	0	0	0	0	0	0	0	0	0	0	0	0	0	0	1	0	1
489	BB2AT2_2255, TonB-dependent receptor, 16807 - 19551	100 kDa	0	0	0	0	0	0	0	0	0	0	0	0	0	0	0	1	0	0	0	0	0	0	0	0	0	0	0	0	0	0	0	0	0	0	0	0	0	0	0	0	0	0	0	0	0	0	0
490	BB2AT2_3876, general secretion pathway protein D, 6295 - 8283	72 kDa	0	0	2	1	0	0	0	0	0	0	0	0	0	0	0	0	0	0	0	1	0	0	0	0	0	0	0	0	0	0	0	0	0	0	1	0	0	0	0	0	0	0	0	0	0	0	0
491	BB2AT2_3293, fkbp-type 16 kda peptidyl-prolyl cis-trans isomerase, 18487 - 18927	16 kDa	0	0	0	0	0	0	0	0	0	0	0	0	0	0	0	0	0	0	1	0	0	0	0	0	0	0	0	0	0	0	0	0	0	0	0	0	0	0	0	0	0	0	0	0	0	0	0
492	BB2AT2_1841, mannitoldehydrogenase, 38260 - 39309	?	0	0	0	0	0	1	0	0	0	0	0	0	0	0	0	0	0	0	0	0	0	0	0	0	0	0	0	0	0	0	0	0	0	0	0	0	0	0	0	0	0	0	0	0	0	0	0
493	BB2AT2_1356, ribosomal protein S21, 90942 - 91157	9 kDa	0	0	0	3	3	0	0	0	0	0	0	0	0	0	0	0	0	0	0	1	2	1	0	0	0	0	0	0	0	0	0	0	0	0	0	0	0	0	0	0	0	0	0	0	0	0	0
494	BB2AT2_1780, UTP--glucose-1-phosphate uridylyltransferase, 92098 - 92400	11 kDa	0	0	0	0	0	0	0	0	0	0	0	0	0	0	0	0	0	0	0	0	0	1	0	0	0	0	0	0	0	0	0	0	0	0	0	0	0	0	0	0	0	0	0	0	0	0	0
495	BB2AT2_3608, YjqA, 21829 - 22203	14 kDa	0	0	0	0	0	0	0	0	0	0	0	0	0	0	0	0	0	0	0	0	0	0	0	0	0	0	0	0	0	0	0	0	0	0	0	0	0	0	0	1	0	0	0	0	0	0	0
496	BB2AT2_0475, lipoprotein NlpI, 95877 - 96755	33 kDa	0	0	0	1	0	0	0	0	0	0	0	0	0	0	0	0	0	0	0	0	0	0	0	0	0	0	0	0	0	0	0	0	0	0	0	0	0	0	0	0	0	0	0	0	0	0	0
497	BB2AT2_1795, EpsU, 105547 - 106764	45 kDa	0	0	1	2	1	0	0	0	0	0	0	0	0	0	0	0	0	0	1	2	0	0	0	0	0	0	0	0	0	0	0	0	0	0	0	0	0	0	0	0	0	0	0	0	0	0	0
498	BB2AT2_4123, UDP-glucose 4-epimerase, 1724 - 2740	37 kDa	0	0	0	0	0	0	0	0	0	0	0	0	0	0	0	0	0	0	0	0	0	0	0	0	0	0	0	0	0	0	0	0	0	0	0	0	0	0	0	0	0	0	0	0	0	0	0
499	BB2AT2_3368, glucans biosynthesis protein D, 34307 - 35926	61 kDa	0	0	0	0	0	0	0	0	0	0	0	0	0	0	0	0	0	0	0	0	0	0	0	0	0	0	0	0	0	0	0	0	0	0	0	0	0	0	0	0	0	0	0	0	0	0	0
500	BB2AT2_3010, pyridoxal phosphate enzyme, YggS family, 2221 - 2934	26 kDa	0	0	0	0	0	0	0	0	0	0	0	0	0	0	0	0	0	0	0	0	0	0	0	0	0	0	0	0	0	0	0	0	0	0	0	4	1	1	0	0	0	0	0	0	2	2	0
501	BB2AT2_2362, 6-phosphogluconolactonase, 53155 - 53865	25 kDa	0	0	0	0	0	0	0	0	0	0	0	0	0	0	0	0	0	0	0	0	0	0	0	0	0	0	0	0	0	0	0	0	0	0	0	0	0	0	0	0	1	3	0	0	0	0	0
502	BB2AT2_0441, protein-(glutamine-N5) methyltransferase, ribosomal protein L3-specific, 63695 - 64630	34 kDa	0	0	0	0	0	0	0	0	0	0	0	0	0	0	0	0	0	0	0	0	0	0	0	0	0	0	0	0	0	0	0	0	0	0	0	0	0	0	0	0	0	0	0	0	0	0	0
503	BB2AT2_0812, conserved hypothetical protein, 68107 - 68421	12 kDa	0	0	0	0	0	0	0	0	0	0	0	0	0	0	0	0	0	0	0	0	0	0	0	0	0	0	6	1	0	0	0	0	0	0	0	0	0	0	0	0	0	2	0	0	0	0	0
504	BB2AT2_1424, conserved hypothetical protein, 156965 - 157324	13 kDa	0	0	0	0	0	0	0	0	0	0	0	0	0	0	0	0	0	0	0	0	0	0	0	0	0	0	0	0	0	0	0	0	0	0	0	0	0	0	0	0	0	0	0	0	0	0	0
505	BB2AT2_0581, isoquinoline 1-oxidoreductase subunit alpha, 18089 - 18577	17 kDa	0	0	0	0	0	0	0	0	0	0	0	0	0	0	0	0	0	0	0	0	0	0	0	0	2	0	0	0	0	0	0	0	0	0	0	0	0	0	0	7	5	0	0	0	0	0	0
506	BB2AT2_4070, guanylate kinase, 3391 - 4011	23 kDa	0	0	0	0	0	0	0	0	0	0	0	0	0	0	0	0	0	0	0	0	0	0	0	0	0	0	0	0	0	0	0	0	0	0	0	0	0	0	0	0	9	4	3	0	0	0	0
507	BB2AT2_1911, SpoOM family protein, 103781 - 104524	28 kDa	0	0	0	0	0	0	0	0	0	0	0	0	0	0	0	0	0	0	0	0	0	0	0	0	0	0	0	0	0	0	0	0	0	0	0	0	0	0	0	0	0	0	0	1	0	0	0
508	REVERSED - BB2AT2_1610, metal dependent phosphohydrolase domain-containing protein, 43566 - 44765	44 kDa	0	0	0	0	0	0	0	0	0	0	0	0	0	1	2	0	0	0	0	0	0	0	0	0	0	0	0	0	0	0	0	0	0	0	0	0	0	0	0	0	0	0	0	0	0	0	0
509	BB2AT2_3065, UDP-glucose 6-dehydrogenase, 59725 - 60891	43 kDa	0	0	0	0	0	0	0	0	0	0	0	0	0	0	0	0	0	0	0	0	0	0	0	0	0	0	0	0	0	0	0	0	0	0	0	0	0	0	0	0	1	0	0	1	0	0	0
510	BB2AT2_1978, IscR-regulated protein YhgI, 52423 - 52998	21 kDa	0	0	0	0	0	0	0	0	0	0	0	0	0	0	0	0	0	0	0	0	0	0	0	0	0	0	0	0	0	0	0	0	0	0	0	0	0	0	0	0	0	0	0	0	0	0	0
511	BB2AT2_1928, soluble pyridine nucleotide transhydrogenase, 7266 - 8603	49 kDa	0	0	0	0	0	0	0	0	0	0	0	0	0	0	0	0	0	0	0	0	0	0	0	0	0	0	0	0	0	0	0	0	0	0	0	2	1	0	0	0	0	0	0	0	0	0	0
512	BB2AT2_2132, ferredoxin, 2Fe-2S type, ISC system, 99433 - 99771	12 kDa	0	0	0	0	0	0	0	0	0	0	0	0	0	0	0	0	0	0	0	0	0	0	0	0	0	0	0	0	0	0	0	0	0	0	0	0	0	0	0	0	0	0	0	0	0	0	0
513	BB2AT2_1139, regulator of ribonuclease activity A, 46505 - 46987	17 kDa	0	0	0	0	0	0	0	0	0	0	0	0	0	0	0	0	0	0	0	0	0	0	0	0	0	0	0	0	0	0	0	0	0	0	1	0	0	0	0	0	0	0	0	0	0	0	0
514	BB2AT2_1927, uroporphyrinogen decarboxylase, 6132 - 7196	39 kDa	0	0	0	0	0	0	0	0	0	0	0	0	0	0	0	0	0	0	0	0	0	0	0	0	0	0	0	0	0	0	0	0	0	0	0	0	0	0	0	0	0	0	0	0	0	0	0
515	BB2AT2_1348, O-methyltransferase, 81230 - 82051	30 kDa	0	0	0	0	0	0	0	0	0	0	0	5	2	0	0	0	0	0	0	0	0	0	0	0	0	0	0	0	1	0	0	0	0	0	0	0	0	0	0	0	0	0	0	0	1	0	0
516	BB2AT2_1876, conserved hypothetical protein, 73294 - 73593	11 kDa	0	0	0	0	0	0	0	0	0	0	0	0	0	0	0	0	0	0	0	0	0	0	0	0	0	0	0	0	0	0	0	0	0	0	0	0	0	0	0	0	0	0	0	0	0	0	0
517	BB2AT2_0057, alpha/beta hydrolase superfamily protein, 57808 - 60237	84 kDa	0	0	0	0	0	0	0	0	0	0	0	0	0	0	0	0	0	0	0	0	0	0	0	0	0	0	0	0	0	0	0	0	0	0	0	0	0	0	0	0	0	0	0	0	0	0	0
518	BB2AT2_3992, conserved hypothetical protein, 5470 - 6390	34 kDa	0	0	0	0	0	0	0	0	0	0	0	0	0	0	0	0	0	0	0	0	0	0	0	0	0	0	0	0	0	0	0	0	0	0	0	0	0	0	0	0	0	0	0	0	0	0	0
519	BB2AT2_0830, RNA polymerase sigma factor RpoS, 80372 - 81346	37 kDa	0	0	0	0	0	0	0	0	0	0	0	0	0	0	0	0	0	0	0	0	0	0	0	0	0	0	0	0	0	0	0	0	0	0	0	0	0	0	0	0	0	0	0	0	0	0	0
520	BB2AT2_2472, fumaratehydratase class II 1, 76333 - 76836	?	0	0	0	0	0	0	0	0	0	0	0	0	0	0	0	0	0	0	0	0	0	0	0	0	0	0	0	0	0	0	0	0	0	0	0	0	0	0	0	0	0	0	0	0	0	0	0
521	BB2AT2_3973, divalent-cation tolerance protein CutA, 5952 - 6272	12 kDa	0	0	0	0	0	0	0	0	0	0	0	0	0	0	0	0	0	0	0	0	0	0	0	0	0	0	0	0	0	0	0	0	0	0	0	0	0	0	0	0	0	0	0	0	0	0	0
522	BB2AT2_0549, peptidase, metallopeptidases, 169081 - 169362	11 kDa	0	0	0	0	0	0	0	0	0	0	0	0	0	0	0	0	0	0	0	0	0	0	0	0	0	0	0	0	0	0	0	0	0	0	0	0	0	0	0	0	0	8	3	0	0	0	0
523	BB2AT2_1764, 3-oxoacyl-(acyl-carrier-protein) reductase, 77041 - 77787	26 kDa	0	0	0	0	0	0	0	0	0	0	0	0	0	0	0	0	0	0	0	0	1	0	0	0	0	0	0	0	0	0	0	0	0	0	0	1	0	0	0	0	0	0	0	0	0	0	0
524	BB2AT2_0182, methylmalonate-semialdehyde dehydrogenase, 205903 - 207393	54 kDa	0	0	0	0	0	0	0	0	0	0	0	0	0	0	0	0	0	0	0	0	0	0	0	0	0	0	0	0	0	0	0	0	0	0	0	0	0	0	0	0	0	0	0	0	0	0	0
525	BB2AT2_1254, conserved hypothetical protein, 164039 - 165766	66 kDa	0	0	0	0	1	0	0	0	0	0	0	0	0	0	0	0	0	0	0	0	0	0	0	0	0	0	0	0	0	0	0	0	0	0	0	0	0	0	0	0	0	0	0	0	0	0	0
526	BB2AT2_1626, thiaminebiosynthesis/tRNA modification protein ThiI, 61046 - 62503	?	0	0	0	0	0	0	0	0	0	0	0	0	0	0	0	0	0	0	0	0	0	0	0	0	0	0	0	0	0	0	0	0	0	0	0	0	0	0	0	0	0	0	0	0	0	0	0
527	BB2AT2_2729, anthranilate synthase component I, 12617 - 14185	57 kDa	0	0	0	0	0	0	0	0	0	0	0	0	0	0	0	0	0	0	0	0	0	0	0	0	0	0	0	0	0	0	0	0	0	0	0	0	0	0	0	0	0	0	0	0	0	0	0
528	BB2AT2_2658, 3-deoxy-D-manno-octulosonate cytidylyltransferase, 17908 - 18669	28 kDa	0	0	0	0	0	0	0	0	0	0	0	0	0	0	0	0	0	0	0	0	0	0	0	0	0	0	0	0	0	0	0	0	0	0	0	0	0	0	0	0	0	0	0	0	0	0	0
529	BB2AT2_0002, 2-methylcitrate synthase, 1056 - 2183	41 kDa	0	0	0	0	0	0	0	0	0	0	1	0	0	0	0	0	0	0	0	0	0	0	0	0	0	0	0	0	0	0	0	0	0	0	0	0	0	0	0	0	0	0	0	0	0	0	0
530	BB2AT2_0997, catalase, 83176 - 84609	54 kDa	0	0	0	0	0	0	0	0	0	0	0	0	0	0	0	0	0	0	0	0	0	0	0	0	0	0	0	0	0	0	0	0	0	0	0	0	0	0	0	0	0	0	0	0	0	0	0
531	BB2AT2_1681, phosphoheptose isomerase, 106044 - 106634	21 kDa	0	0	0	0	0	0	0	0	0	0	0	0	0	0	0	0	0	0	0	0	0	0	0	0	0	0	0	0	0	0	0	0	0	0	0	0	0	0	0	0	0	0	0	0	0	0	0
532	BB2AT2_0515, conserved hypothetical protein, 130186 - 130644	18 kDa	0	0	0	0	0	0	0	0	0	0	0	0	0	0	0	0	0	0	0	0	0	0	0	0	0	0	0	0	0	0	0	0	0	0	0	0	0	0	0	0	0	0	0	0	0	0	0
533	BB2AT2_2964, formiminoglutamate hydrolase, 11629 - 12744	41 kDa	0	0	0	0	0	0	0	0	0	0	0	0	0	0	0	0	0	0	0	0	0	0	0	0	0	0	0	0	0	0	0	0	0	0	0	0	0	0	2	8	0	0	0	0	0	0	0
534	BB2AT2_3578, phenylalanyl-tRNA synthetase, alpha subunit, 40638 - 41618	37 kDa	0	0	0	0	0	0	0	0	0	0	0	0	0	0	0	0	0	0	0	0	0	0	0	0	0	0	0	0	0	0	0	0	0	0	0	0	0	0	0	0	0	0	0	0	0	0	0
535	BB2AT2_3114, acyl-CoAthioesterase II, 36122 - 36979	?	0	0	0	0	0	0	0	0	0	0	0	0	0	0	0	0	0	0	0	0	0	0	0	0	0	0	0	0	0	0	0	0	0	0	0	0	0	0	0	0	0	0	0	0	0	0	0
536	BB2AT2_2088, conserved hypothetical protein, 49233 - 50213	37 kDa	0	0	0	0	0	0	0	0	0	0	0	0	0	0	0	0	0	0	0	0	0	0	0	0	0	0	0	6	0	0	0	0	0	0	0	0	0	0	0	0	0	0	0	0	0	0	0
537	BB2AT2_3581, conserved hypothetical protein, 46 - 774	28 kDa	0	0	0	0	0	0	0	0	0	0	0	0	0	0	0	0	0	0	0	0	0	0	0	0	0	0	0	0	0	0	0	0	0	0	0	0	0	0	0	0	0	0	0	0	0	0	0
538	BB2AT2_3830, conserved hypothetical protein, 14958 - 15623	25 kDa	0	0	0	0	0	0	0	0	0	0	0	0	0	0	0	0	0	0	0	0	0	0	0	0	0	0	0	0	0	0	0	0	0	0	0	0	0	0	0	0	0	0	0	0	0	0	0
539	BB2AT2_3604, peroxisomal NADH pyrophosphatase nudt12, 17821 - 18744	35 kDa	0	0	0	0	0	0	0	0	0	0	0	0	0	0	0	0	0	0	0	0	0	0	0	0	0	0	0	0	0	1	0	0	0	0	0	0	0	0	0	0	0	0	0	0	1	0	0
540	BB2AT2_0313, alkalinephosphatase 3, 130115 - 130519	?	0	0	0	0	0	0	0	0	0	0	0	0	0	0	0	0	0	0	0	0	0	0	0	0	1	0	0	0	0	0	0	0	0	0	0	0	0	0	0	9	2	0	0	0	0	0	1
541	BB2AT2_0801, conserved hypothetical protein, 56954 - 57886	34 kDa	0	0	0	0	0	0	0	0	0	0	0	0	0	0	0	0	0	0	0	0	0	0	0	0	0	0	0	0	0	0	0	0	0	0	0	0	0	0	0	0	0	0	0	0	1	0	0
542	BB2AT2_2968, urocanate hydratase, 16756 - 18429	61 kDa	0	0	0	0	0	0	0	0	0	0	0	0	0	0	0	0	0	0	0	0	0	0	0	0	0	0	0	0	0	0	0	0	0	0	0	0	0	0	0	1	0	0	0	0	0	0	0
543	BB2AT2_2226, protein Tas, 77475 - 78527	39 kDa	0	0	0	0	0	0	0	0	0	0	0	0	0	0	0	0	0	0	0	0	0	0	0	0	0	0	0	0	0	0	0	0	0	0	0	0	0	0	0	0	0	0	0	0	0	0	0
544	BB2AT2_3393, dihydroorotase, 4366 - 5700	49 kDa	0	0	0	0	0	0	0	0	0	0	5	1	0	0	0	0	0	0	0	0	0	0	0	0	0	0	0	0	0	0	0	0	0	0	0	0	0	0	0	0	0	0	0	0	0	0	0
545	BB2AT2_2151, putativeesterase, 13180 - 14379	?	0	0	0	0	0	0	0	1	0	0	0	0	0	0	1	0	0	0	0	0	0	0	0	0	0	0	0	0	0	0	0	0	0	0	0	0	0	0	4	2	0	0	0	0	0	0	0
546	BB2AT2_3650, khg/kdpgaldolase, 22652 - 23269	?	0	0	0	0	0	0	0	0	0	0	0	0	0	0	0	0	0	0	0	0	0	0	0	0	0	0	0	0	0	0	0	0	0	0	0	0	0	0	0	0	0	0	0	0	0	0	0
547	BB2AT2_0184, enoyl-CoA hydratase, 208703 - 209488	28 kDa	0	0	0	0	0	0	0	0	0	0	0	0	0	0	0	0	0	0	0	0	0	0	0	0	0	0	0	0	0	0	0	0	0	0	0	0	0	0	0	1	0	0	0	0	0	0	0
548	BB2AT2_0051, exodeoxyribonuclease III, 52933 - 53739	31 kDa	0	0	0	0	0	0	0	0	0	0	0	0	0	0	0	0	0	0	0	0	1	0	0	0	0	0	0	0	0	0	0	0	0	0	0	0	0	0	0	0	0	0	0	0	0	0	0
549	BB2AT2_2341, cys regulon transcriptional activator CysB, 31508 - 32485	36 kDa	0	0	0	0	0	0	0	0	0	0	0	0	0	0	0	0	0	0	0	0	0	0	0	0	0	0	0	0	0	0	0	0	0	0	0	0	0	0	0	0	0	0	1	0	0	0	0
550	BB2AT2_1590, iron-sulfur cluster insertion protein ErpA, 15197 - 15535	12 kDa	0	0	0	0	0	0	0	0	0	0	0	0	0	0	0	0	0	0	0	0	0	0	0	0	0	0	0	0	0	0	0	0	0	0	0	0	0	0	0	0	0	0	0	0	0	0	0
551	BB2AT2_3342, transcriptional regulator, 6762 - 7418	25 kDa	0	0	0	0	0	0	0	0	0	0	0	0	0	0	0	0	0	0	0	1	0	0	0	0	0	0	0	0	0	0	0	0	0	0	0	0	0	0	0	0	0	0	0	0	0	0	0
552	BB2AT2_0176, enoyl-CoA hydratase/isomerase, 200214 - 200984	28 kDa	0	0	0	0	0	0	0	0	0	0	0	0	0	0	0	0	0	0	0	0	0	0	0	0	0	0	0	0	0	0	0	0	0	0	0	0	0	0	0	0	0	0	0	0	0	0	0
553	BB2AT2_2770, fructosamine kinase family protein, 45577 - 46440	34 kDa	0	0	0	0	0	0	0	0	0	0	0	0	0	1	0	0	0	0	0	0	0	0	0	0	0	0	0	0	0	0	0	0	0	0	0	0	0	0	0	0	0	0	0	0	0	0	0
554	BB2AT2_0728, conserved hypothetical protein, 176530 - 177336	30 kDa	0	0	0	0	0	0	0	0	0	0	0	0	0	1	0	8	0	0	0	0	0	0	0	0	0	0	0	0	0	0	0	0	0	0	0	0	0	0	0	0	0	0	0	0	0	0	0
555	BB2AT2_2504, methionine gamma-lyase, 19927 - 21108	42 kDa	0	0	0	0	0	0	0	0	0	0	0	0	0	0	0	0	0	0	0	0	0	0	0	0	0	0	0	0	0	0	0	0	0	0	0	0	0	0	0	0	0	0	0	0	0	0	0
556	BB2AT2_0774, conserved hypothetical protein, 26971 - 27927	36 kDa	0	0	0	0	0	0	0	0	0	0	0	0	0	0	0	0	0	0	0	0	0	0	0	0	0	0	0	0	0	0	0	0	0	0	0	0	0	0	0	0	0	0	0	0	0	0	0
557	BB2AT2_1240, biofilm dispersion protein BdlA, 149256 - 150581	49 kDa	0	0	0	0	0	0	0	0	0	0	0	0	0	0	0	0	0	0	0	0	0	0	0	0	0	0	0	0	0	0	0	0	0	0	0	0	0	0	0	0	0	0	0	0	0	0	0
558	BB2AT2_1754, nucleoid-associated protein NdpA, 66534 - 67550	38 kDa	0	0	0	0	0	0	0	0	0	0	0	0	0	0	0	0	0	0	0	0	0	0	0	0	0	0	0	0	0	0	0	0	0	0	0	0	0	0	0	0	0	0	0	0	0	0	0
559	BB2AT2_2431, hydrolase, 33252 - 34100	31 kDa	0	0	0	0	0	0	0	0	0	0	0	0	0	0	0	0	0	0	0	0	0	0	0	0	0	0	0	0	2	0	0	0	0	0	0	0	0	0	0	0	0	0	0	0	0	0	0
560	BB2AT2_2238, succinylglutamate desuccinylase/aspartoacylase, 1277 - 2398	41 kDa	1	0	0	0	0	0	0	0	0	0	0	0	0	0	0	0	0	0	0	0	0	0	0	0	0	0	0	0	0	0	0	0	0	0	0	0	0	0	0	0	0	1	0	0	0	0	0
561	BB2AT2_0442, chorismate synthase, 64689 - 65786	40 kDa	0	0	0	0	1	0	0	0	0	0	0	0	0	0	0	0	0	0	0	0	0	0	0	0	0	0	0	0	0	0	0	0	0	0	0	0	0	0	0	0	0	0	0	0	0	0	0
562	BB2AT2_3436, protein YjbQ, 636 - 1064	16 kDa	0	0	0	0	0	0	0	0	0	0	0	0	0	0	0	0	0	0	0	0	0	0	0	0	0	0	0	0	0	0	0	0	0	0	0	0	0	0	0	0	0	0	0	0	0	0	0
563	BB2AT2_1208, organic hydroperoxide resistance protein, 115897 - 116325	15 kDa	0	0	0	0	0	0	0	0	0	0	0	0	0	0	0	0	0	0	0	0	0	0	0	0	0	0	0	0	0	0	0	0	0	0	0	0	0	0	0	0	3	0	0	0	0	0	0
564	BB2AT2_2055, ribulose-phosphate 3-epimerase, 16691 - 17374	25 kDa	0	0	0	0	0	0	0	0	0	0	0	0	0	0	0	0	0	0	0	0	0	0	0	0	0	0	0	0	0	0	0	0	0	0	0	0	0	0	0	0	0	0	0	0	0	0	0
565	BB2AT2_3217, coproporphyrinogen III oxidase, aerobic, 2850 - 3800	36 kDa	0	0	0	0	0	0	0	0	0	0	0	0	0	0	0	0	0	0	0	0	0	0	0	0	0	0	0	0	0	0	0	0	0	0	0	0	0	0	0	0	0	0	0	0	0	0	0
566	BB2AT2_1422, fructokinase-1, 155450 - 156007	21 kDa	0	0	0	0	0	0	0	0	0	0	0	0	0	0	1	0	0	0	0	0	0	0	0	0	0	0	0	0	0	0	0	0	0	0	0	0	0	0	0	0	0	0	0	0	0	0	0
567	BB2AT2_3706, secreted TonB-dependent receptor, 5489 - 7801	84 kDa	0	0	0	0	0	0	0	0	0	0	0	0	0	0	0	0	0	0	0	0	0	0	0	0	0	0	0	0	0	0	0	0	0	0	0	0	0	0	0	0	0	0	0	0	0	0	0
568	BB2AT2_3069, adenylylsulfate kinase, 63434 - 64045	22 kDa	0	0	0	0	0	0	0	0	0	0	0	0	0	0	0	0	0	0	0	1	0	0	0	0	0	0	0	0	0	0	0	0	0	0	0	0	0	0	0	3	2	0	0	0	0	0	0
569	BB2AT2_3136, dUTPase,54767 - 55390	?	0	0	0	0	0	0	0	0	0	0	0	0	0	0	0	0	0	0	0	0	0	0	0	0	0	0	0	0	0	0	0	0	0	0	0	0	0	0	0	0	0	0	0	0	0	0	0
570	BB2AT2_1202, alkylhydroperoxidase, 109480 - 110022	20 kDa	0	0	0	0	0	0	0	0	0	0	0	0	0	0	0	0	0	0	0	0	0	0	0	0	0	0	0	0	0	0	0	0	0	0	0	0	0	0	0	0	0	0	0	0	0	0	0
571	BB2AT2_0268, conserved hypothetical protein, 82144 - 82725	22 kDa	0	0	0	0	0	0	0	0	0	0	0	0	0	0	0	0	0	0	0	0	0	0	0	0	0	0	0	0	0	0	0	0	0	0	0	0	0	0	0	0	0	0	0	0	0	0	0
572	BB2AT2_1400, Dyp-typeperoxidase family protein, 133518 - 134417	?	0	0	0	0	0	0	0	0	0	0	0	0	0	0	0	0	0	0	0	0	0	0	0	0	0	0	0	0	0	0	0	0	0	0	0	0	0	0	0	0	0	0	0	0	0	0	0
573	BB2AT2_0884, 23S rRNA(uracil-5-)-methyltransferase, 139301 - 140626	?	0	0	0	0	0	0	0	0	0	0	0	0	0	0	0	0	0	0	0	0	0	0	0	0	0	0	0	0	0	0	0	0	0	0	0	3	0	0	0	0	0	0	0	0	0	0	0
574	BB2AT2_3777, riboflavin synthase, alpha subunit, 19665 - 20222	20 kDa	0	0	0	0	0	0	0	0	0	0	0	0	0	0	0	0	0	0	0	0	0	0	0	0	0	0	0	0	0	0	0	0	0	0	0	0	0	0	0	0	0	0	0	0	0	0	0
575	BB2AT2_2789, outer membrane lipoprotein carrier protein LolA, 66442 - 67068	23 kDa	0	0	0	0	0	0	0	0	0	0	0	0	0	0	0	0	0	0	0	0	0	0	0	0	0	0	0	0	0	0	0	0	0	0	0	0	0	0	0	0	0	0	0	0	0	0	0
576	BB2AT2_1640, ornithine carbamoyltransferase, 71965 - 72897	34 kDa	0	0	0	0	0	0	0	0	0	0	0	0	0	0	0	0	0	0	0	0	0	0	0	0	0	0	0	0	0	0	0	0	0	0	0	0	0	0	0	0	0	0	0	0	0	0	0
577	BB2AT2_2982, conserved hypothetical protein, 34737 - 35333	23 kDa	0	0	0	0	0	0	0	0	0	0	0	0	0	0	0	0	0	0	0	0	0	0	0	0	0	0	0	0	0	0	0	0	0	0	0	0	0	0	0	0	0	0	0	0	0	0	0
578	BB2AT2_2420, conserved hypothetical protein, 24697 - 25998	49 kDa	0	0	0	0	0	0	0	0	0	0	0	0	0	0	0	0	0	0	0	0	0	0	0	0	0	0	0	0	0	0	0	0	0	0	0	0	0	0	0	0	0	0	0	0	0	0	0
579	BB2AT2_2471, fumaratehydratase class II 1, 75461 - 76336	?	0	0	0	0	0	0	0	0	0	0	0	0	0	0	0	0	0	0	0	0	0	0	0	0	0	0	0	0	0	0	0	0	0	0	0	0	0	0	0	0	0	0	0	0	0	0	0
580	BB2AT2_1867, hydrolase, 63743 - 64477	27 kDa	0	0	0	0	0	0	0	0	0	0	0	0	0	0	0	0	0	0	0	0	0	0	0	0	0	1	0	0	0	0	0	0	0	0	0	0	0	0	0	0	0	0	0	0	0	0	0
581	BB2AT2_1228, levanase, 133572 - 135014	55 kDa	0	0	0	0	0	0	0	0	0	0	0	0	0	0	1	0	0	0	0	0	0	0	0	0	0	0	0	0	0	0	0	0	0	0	0	0	0	0	0	0	4	0	0	0	0	0	0
582	BB2AT2_1939, conserved hypothetical protein, 19718 - 20161	17 kDa	0	0	0	0	0	0	0	0	0	0	0	0	0	0	0	0	0	0	0	0	0	0	0	0	0	0	0	0	0	0	0	0	0	0	0	0	0	0	0	0	0	0	4	0	0	0	0
583	BB2AT2_1194, conserved hypothetical protein, 104474 - 104986	19 kDa	0	0	0	0	0	0	0	0	0	0	0	0	0	0	0	0	0	0	0	0	0	0	0	0	0	0	0	0	0	0	0	0	0	0	0	0	0	0	0	2	2	0	0	0	0	0	0
584	BB2AT2_1006, glutathione S-transferase, 91734 - 92411	26 kDa	0	0	0	0	0	0	0	0	0	0	0	0	0	0	0	0	0	0	0	0	0	0	0	0	0	0	0	0	0	0	0	0	0	0	0	0	0	0	0	0	3	0	0	0	0	0	0
585	BB2AT2_3961, conserved hypothetical protein, 17263 - 18174	35 kDa	0	0	0	0	0	0	0	0	0	0	0	0	0	0	0	0	0	0	0	0	3	0	0	0	0	0	0	0	0	0	0	0	0	0	0	0	0	0	0	0	0	0	0	0	0	0	0
586	BB2AT2_1294, PhnA protein, 26451 - 27017	21 kDa	0	0	0	0	0	0	0	0	0	0	0	0	0	0	0	0	0	0	0	0	0	0	0	0	0	0	0	0	0	0	0	0	0	0	0	0	0	0	0	0	0	0	0	0	0	0	0
[truncated: 112 more columns]
